# Supplementary material for: Novel histone deacetylase 6 inhibitors using benzimidazole as caps for cancer treatment
Source: Royal Society of Chemistry journal article supplement (doi:10.1039/d2nj05731j), 2023-01-01
Supplement: d2nj05731j1.pdf [file d2nj05731j1.pdf]

## SUPPORTING INFORMATION

### Novel Histone Deacetylase 6 Inhibitors Using Benzimidazole as Caps for Cancer Treatment

Phuong Hong Nguyen<sup>1,2,+</sup>, Bui Thi Buu Hue<sup>3,+\*</sup>, Minh Quan Pham<sup>4,5,+</sup>, Tran Phuong Hoa<sup>1,2</sup>, Tran Quang De<sup>3</sup>, Jung Hosun<sup>1,2</sup>, Le Trong Hieu<sup>3</sup>, Nguyen Cuong Quoc<sup>3</sup>, Hong Vinh Quang<sup>3</sup>, Nguyen Phu Quy<sup>3</sup>, Hye Jin Yoo<sup>1</sup>, Yang Su-Geun<sup>1,2,\*</sup>

<sup>1</sup>Department of Biomedical Science, BK21 FOUR Program in Biomedical Science and Engineering, Inha University College of Medicine, Incheon 22212, Korea

<sup>2</sup>Inha Institute of Aerospace Medicine, Inha University College of Medicine, Incheon 22332, Korea

<sup>3</sup>College of Natural Sciences, Can Tho University, Viet Nam

<sup>4</sup>Institute of Natural Products Chemistry, Vietnam Academy of Science and Technology, Ha Noi, Vietnam

<sup>5</sup>Graduate University of Science and Technology, Vietnam Academy of Science and Technology, Ha Noi, Vietnam

\*Corresponding author:

Yang Su-Geun <[sugeun.yang@inha.ac.kr](mailto:sugeun.yang@inha.ac.kr)>

Bui Thi Buu Hue <[btbhue@ctu.edu.vn](mailto:btbhue@ctu.edu.vn)>

<sup>+</sup>Equal contribution

**Running title:** Novel Histone Deacetylase 6 Inhibitors Using Benzimidazole as Caps for Cancer Treatment

**Key words:** Anticancer, benzimidazole, histone deacetylase, hydroxamate, molecular docking.

## List of supplement material

|                                                   |  |  |  |  |  |  |  |  |             |
|---------------------------------------------------|--|--|--|--|--|--|--|--|-------------|
| S1.                                               |  |  |  |  |  |  |  |  |             |
| Chemistry.....                                    |  |  |  |  |  |  |  |  | <b>Erro</b> |
| <b>r! Bookmark not defined.</b>                   |  |  |  |  |  |  |  |  |             |
| S2. Detailed description for docking studies..... |  |  |  |  |  |  |  |  | 13          |
| S3. Scanned spectra of compounds (1-              |  |  |  |  |  |  |  |  |             |
| 19).....                                          |  |  |  |  |  |  |  |  | 145         |

## **S1. Chemistry**

### **S1.1 General information**

Reactions were monitored by thin-layer chromatography (TLC) on 0.2 mm pre-coated silica-gel 60 F254 plates (Merck). <sup>1</sup>H NMR and <sup>13</sup>C NMR spectra were measured with Bruker Avance 300 MHz, Bruker Avance 500 MHz and Bruker Avance 600 MHz spectrometers. Mass spectrometry (MS) data were recorded on an 1100 series LC-MSD-Trap-LS Agilent spectrometer and HRESI-MS observation was performed on a Bruker MicrOTOF-Q mass spectrometer. FT-IR was conducted using KBr pellet method on Thermo Nicolet 6700. Chemical shifts are given in parts per million (ppm) relative to tetramethylsilane (Me<sub>4</sub>Si, δ = 0); J values are given in Hertz.

## S1.2 Preparation of benzimidazole based hydroxamates (1-11)

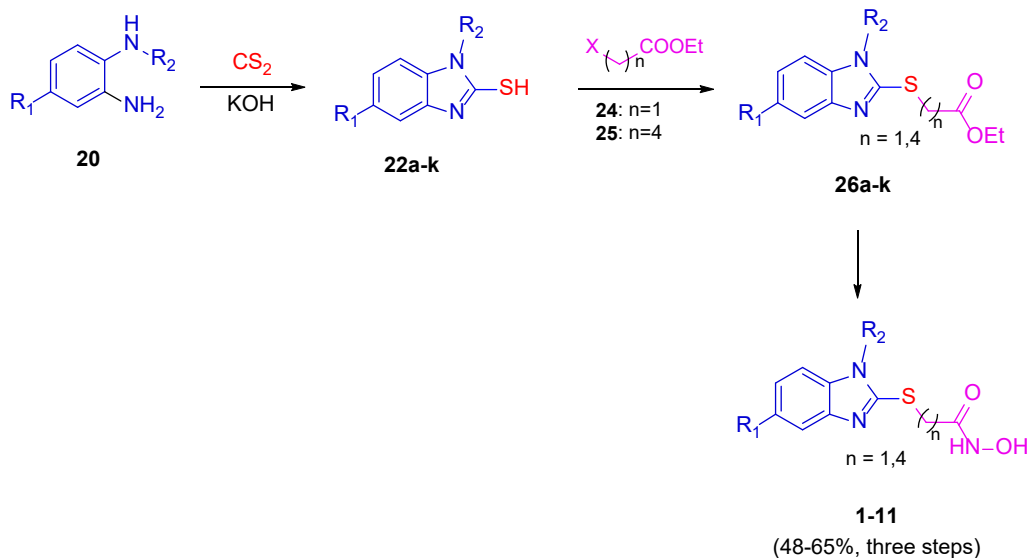

|          | R <sub>1</sub>   | R <sub>2</sub>  | n | Yield (%) |    |      |           |
|----------|------------------|-----------------|---|-----------|----|------|-----------|
|          |                  |                 |   | 22        | 26 | 1-11 |           |
| <b>a</b> | H                | H               | 4 | 85        | 75 | 79   | <b>1</b>  |
| <b>b</b> | Cl               | H               | 4 | 91        | 83 | 81   | <b>2</b>  |
| <b>c</b> | OCH <sub>3</sub> | H               | 4 | 87        | 85 | 65   | <b>3</b>  |
| <b>d</b> | H                | Bn              | 4 | 90        | 86 | 78   | <b>4</b>  |
| <b>e</b> | CF <sub>3</sub>  | Bn              | 4 | 95        | 81 | 86   | <b>5</b>  |
| <b>f</b> | CF <sub>3</sub>  | <i>o</i> -Cl-Bn | 4 | 92        | 83 | 76   | <b>6</b>  |
| <b>g</b> | H                | <i>o</i> -Cl-Bn | 4 | 89        | 89 | 72   | <b>7</b>  |
| <b>h</b> | H                | Bn              | 1 | 90        | 89 | 73   | <b>8</b>  |
| <b>i</b> | CF <sub>3</sub>  | Bn              | 1 | 95        | 84 | 82   | <b>9</b>  |
| <b>j</b> | CF <sub>3</sub>  | <i>o</i> -Cl-Bn | 1 | 92        | 87 | 74   | <b>10</b> |
| <b>k</b> | H                | <i>o</i> -Cl-Bn | 1 | 89        | 91 | 70   | <b>11</b> |

**Scheme S1.** Synthesis of benzimidazole based hydroxamates

### S1.2.1 General procedure for the synthesis of 2-mercaptobenzimidazoles (22a-k)

A mixture of **20** (5 mmol) and KOH (2 equiv) in ethanol (30 mL) was stirred at room temperature for 30 min, then CS<sub>2</sub> (2 equiv) was added and the resulting mixture was refluxed for 4-5 hrs. After

the reaction was finished (monitored by TLC), the solvent was removed under reduced pressure and 10 mL of water was added. Aqueous saturated solution of  $\text{NH}_4\text{Cl}$  was gradually added to adjust the pH to 7, which led to the formation of solid. The solid was filtered, washed with water and dried to give the corresponding 2-mercaptobenzimidazole derivatives (**22a-k**), which were used for the next step without further purification.

### **S1.2.2 General procedure for the synthesis of ester (26a-k)**

A mixture of (**22a-k**) (2 mmol) and  $\text{K}_2\text{CO}_3$  (3 equiv) in 10 mL acetone was stirred at room temperature for 30 min. Ester **24** or **25** (3 equiv) was added and the reaction mixture was stirred at  $70^\circ\text{C}$  for 2-5 hrs. After completion of the reaction (monitored by TLC), the reaction mixture was poured into water (10 mL), neutralised with aqueous saturated  $\text{NH}_4\text{Cl}$  solution and the organic layer was extracted by ethyl acetate ( $3 \times 30$  mL). The combined organic extracts were washed with a solution of saturated  $\text{NaCl}$  and dried over anhydrous sodium sulfate. After removal of the solvent under reduced pressure, the residue was purified by silica gel column chromatography to give the corresponding intermediate esters (**26a-k**).

### **S1.2.3 General procedure for the synthesis of hydroxamates (1-11)**

A solution of  $\text{NH}_2\text{OH} \cdot \text{HCl}$  (20 mmol) in ethanol (5 mL) was stirred at room temperature for 20 min and then at  $0^\circ\text{C}$  for additional 10 min, then solution of  $\text{KOH}$  (20.5 mmol) in  $\text{EtOH}$  (6 mL) was added followed by solution of the intermediates (**26a-k**) (0.5 mmol) in ethanol (4 mL). The resulting mixture was stirred for 0.5-1 hrs. At the end of the reaction, the mixture was poured into water (50 mL), neutralised with a solution of  $\text{HCl}$  (1M) to pH 5-6 and extracted with ethyl acetate ( $3 \times 30$  mL). The combined organic layers were washed with a solution of saturated  $\text{NaCl}$ , dried over anhydrous  $\text{Na}_2\text{SO}_4$  and filtered. After removal of the solvent under reduced pressure, the residue was recrystallized in (Hex: $\text{EtOAc}$  = 1:2) to give the target compounds (**1-11**).

### S1.3 Preparation of benzoxazole based hydroxamates (12-19)

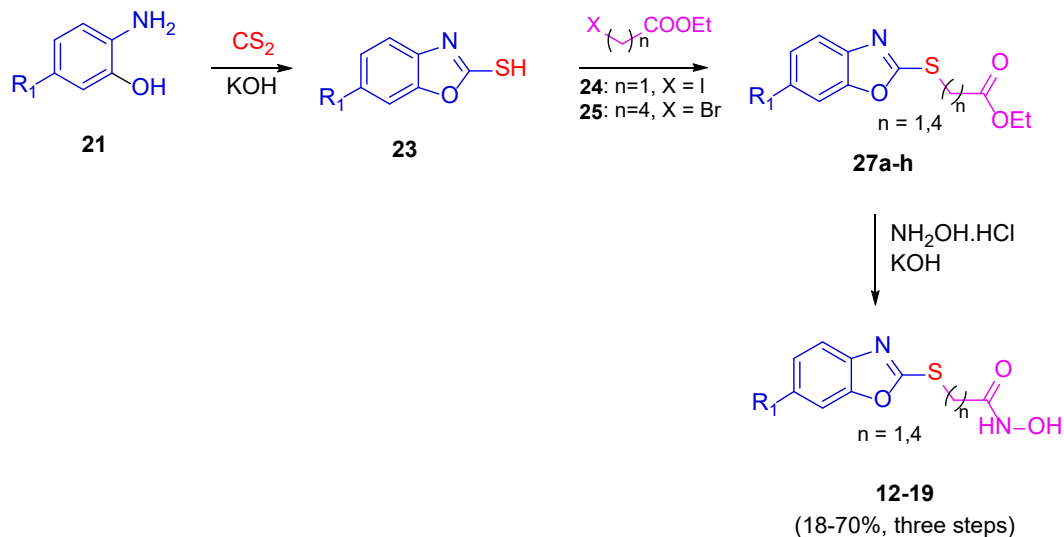

|          |                  | Yield (%) |    |    |       |           |
|----------|------------------|-----------|----|----|-------|-----------|
|          | R <sub>1</sub>   | n         | 23 | 27 | 12-19 |           |
| <b>a</b> | H                | 1         | 84 | 86 | 65    | <b>12</b> |
| <b>b</b> | CH <sub>3</sub>  | 1         | 90 | 92 | 82    | <b>13</b> |
| <b>c</b> | Cl               | 1         | 93 | 90 | 22    | <b>14</b> |
| <b>d</b> | F                | 1         | 85 | 89 | 55    | <b>15</b> |
| <b>e</b> | OCH <sub>3</sub> | 1         | 95 | 87 | 60    | <b>16</b> |
| <b>f</b> | H                | 4         | 93 | 92 | 66    | <b>17</b> |
| <b>g</b> | CH <sub>3</sub>  | 4         | 98 | 94 | 76    | <b>18</b> |
| <b>h</b> | OCH <sub>3</sub> | 4         | 95 | 89 | 68    | <b>19</b> |

**Scheme S2.** Synthesis of benzoxazole based hydroxamates

#### S1.3.1 General procedure for the synthesis of 2-mercaptobenzoxazoles (23a-h)

To a solution of KOH (1.5 mmol) in ethanol (10 mL) was added compound **21** (1.5 mmol) followed by carbon disulfide (3 mmol). The reaction mixture was stirred at 80°C for 2 hrs. After completion of the reaction (based on TLC), excess solvent was removed under reduced pressure and the

residue was dissolved in water (10 mL) and then acidified with dilute hydrochloric acid (10%) to pH 7, which led to the formation of solids. The solids were filtered off, washed with water and dried to give the corresponding 2-mercaptobenzoxazole derivatives (**23a-h**), which was used for the next step without further purification.

### **S1.3.2 General procedure for the synthesis of esters (27a-h)**

The intermediates 2-mercaptobenzoxazole (**23**) (0.8 mmol) was dissolved in 7 mL of acetone, then  $K_2CO_3$  (1.2 mmol) was added and the mixture was stirred at room temperature for 15 min. Then ester (**24**) or (**25**) (0.96 mmol) was added slowly into the reaction mixture and the resulting mixture was stirred at 80°C for 2 hrs. After completion of the reaction (monitored by TLC), the solvent was evaporated under reduced pressure and the resulting mixture was poured into water (10 mL), neutralised with 5% HCl solution and the aqueous phase was extracted with ethyl acetate (3×10 mL). The combined organic layers were washed with a solution of saturated NaCl, dried over anhydrous  $Na_2SO_4$  and filtered. After removal of the solvent under reduced pressure, the residue was purified by silica gel column chromatography to give the corresponding (**27a-h**).

### **S1.3.3 General procedure for the synthesis of benzoxazole based hydroxamates (12-19)**

A solution of  $NH_2OH.HCl$  (6 mmol) in ethanol (5 mL) was stirred at 0°C for 15 min, then KOH (6.9 mmol) was added. The mixture was stirred for further 15 min then the solution of intermediates (**27a-h**) (0.3 mmol) in ethanol (2 mL) was added. The resulting mixture was stirred for 0.5-1 hrs. At the end of this reaction, excess solvent was removed under reduced pressure. The resulting mixture was poured into water (10 mL), neutralised with a 10% solution of HCl to pH~7, extracted with ethyl acetate (3×10 mL). The combined organic layers were washed with a solution of saturated NaCl, dried over anhydrous  $Na_2SO_4$  and filtered. After removal of the solvent under reduced pressure, the residue was purified by silica gel column chromatography to obtain the products (**12-19**).

## S1.4 Spectral data

Spectral data of compounds **1** [1] and **8** [2] were previously described in literature.

**5-((5-Chloro-1H-benzo[d]imidazol-2-yl)thio)-N-hydroxypentanamide (2):** Yield 61% as red solid. Mp 174-176°C. FT-IR (KBr)  $\nu_{\max}$  (cm<sup>-1</sup>): 3636, 3265, 2939, 2864, 2705, 1738, 1652, 1511, 1387, 1061, 808, 756, 434. HR-ESI-MS found  $m/z$  300.0574 [M+H]<sup>+</sup> (calcd. 300.0495, C<sub>12</sub>H<sub>14</sub>ClN<sub>3</sub>O<sub>2</sub>S). <sup>1</sup>H-NMR (500 MHz, DMSO-*d*<sub>6</sub>,  $\delta$  ppm): 12.68 (*d*, *J* = 13.0 Hz, 1H), 10.34 (*s*, 1H), 8.66 (*s*, 1H), 7.55 (*s*, 0.55 H), 7.50 (*d*, *J* = 8.5 Hz, 0.55H), 7.33 (*s*, 0.46H), 7.35 (*d*, *J* = 8.5 Hz, 0.6H), 7.12 (*d*, *J* = 8.0 Hz, 1H), 3.27 (*t*, *J* = 6.5 Hz, 2H), 1.99 (*t*, *J* = 8.0 Hz, 2H), 1.66-1.71 (*m*, 4H). <sup>13</sup>C-NMR (125 MHz, DMSO-*d*<sub>6</sub>,  $\delta$  ppm): 168.8, 152.3, 151.8, 144.6, 142.5, 136.1, 134.2, 125.8, 125.5, 121.4, 121.3, 118.3, 116.7, 111.3, 110.0, 31.7, 30.7, 28.8, 24.2.

**N-Hydroxy-5-((5-methoxy-1H-benzo[d]imidazol-2-yl)thio)pentanamide (3):** Yield 48% as brown yellow solid. Mp 155-157°C. FT-IR (KBr)  $\nu_{\max}$  (cm<sup>-1</sup>): 3477, 3175, 2930, 2844, 2669, 2046, 1751, 1636, 1407, 1203, 756, 438. HR-ESI-MS found  $m/z$  296.1070 [M+H]<sup>+</sup> (calcd. 296.0991, C<sub>13</sub>H<sub>17</sub>N<sub>3</sub>O<sub>3</sub>S). <sup>1</sup>H-NMR (500 MHz, DMSO-*d*<sub>6</sub>,  $\delta$  ppm): 12.32 (*s*, 1H), 10.34 (*s*, 1H), 8.66 (*s*, 1H), 7.38 (*d*, *J* = 8.5 Hz, 0.62H), 7.22 (*d*, *J* = 8.5 Hz, 0.49H), 7.07 (*s*, 0.48H), 6.86 (*d*, *J* = 2.0 Hz, 0.62H), 6.72-6.74 (*m*, 1H), 3.76 (*s*, 3H), 3.23 (*m*, 2H), 1.97 (*t*, *J* = 7.0 Hz, 2H), 1.63-1.65 (*m*, 4H). <sup>13</sup>C-NMR (125 MHz, DMSO-*d*<sub>6</sub>,  $\delta$  ppm): 168.8, 155.3, 155.0, 150.0, 148.2, 144.5, 138.2, 135.9, 129.8, 117.7, 110.5, 110.3, 109.9, 100.6, 94.1, 55.4, 31.7, 31.0, 28.9, 24.2.

**5-((1-Benzyl-1H-benzo[d]imidazol-2-yl)thio)-N-hydroxypentanamide (4):** Yield 60% as white solid. Mp 165-167°C. FT-IR (KBr)  $\nu_{\max}$  (cm<sup>-1</sup>): 3430, 3244, 1643, 1620, 1421, 1384, 739, 728. HR-ESI-MS found  $m/z$  356.1434 [M+H]<sup>+</sup> (calcd. 356.1354, C<sub>19</sub>H<sub>21</sub>N<sub>3</sub>O<sub>2</sub>S). <sup>1</sup>H-NMR (600 MHz, DMSO-*d*<sub>6</sub>,  $\delta$  ppm): 10.35 (*s*, 1H), 8.68 (*s*, 1H), 7.57-7.58 (*m*, 1H), 7.45-7.47 (*m*, 1H), 7.33 (*t*, *J* = 7.2 Hz, 2H), 7.27 (*t*, *J* = 7.2 Hz, 1H), 7.19 (*d*, *J* = 7.2 Hz, 2H), 7.13-7.17 (*m*, 2H), 5.39 (*s*, 2H), 3.33 (*s*, 2H), 1.97-1.99 (*m*, 2H), 1.69-1.72 (*m*, 2H), 1.61-1.65 (*m*, 2H). <sup>13</sup>C-NMR (150 MHz,



DMSO-*d*<sub>6</sub>,  $\delta$  ppm): 168.8, 151.6, 143.0, 136.4, 136.1, 128.7, 127.7, 127.0, 121.7, 121.6, 117.6, 109.7, 46.6, 31.7, 31.5, 28.6, 24.2.

**5-((1-Benzyl-5-(trifluoromethyl)-1*H*-benzo[*d*]imidazol-2-yl)thio)-*N*-hydroxypentanamide**

**(5):** Yield 66% as white solid. Mp 162-164°C. FT-IR (KBr)  $\nu_{\max}$  (cm<sup>-1</sup>): 3253, 3131, 2867, 1653, 1627, 1426, 1105, 729. HR-ESI-MS found  $m/z$  424.1306 [M+H]<sup>+</sup> (calcd. 424.1228, C<sub>20</sub>H<sub>20</sub>F<sub>3</sub>N<sub>3</sub>O<sub>2</sub>S). <sup>1</sup>H-NMR (500 MHz, DMSO-*d*<sub>6</sub>,  $\delta$  ppm): 10.34 (*s*, 1H), 8.66 (*s*, 1H), 7.93 (*s*, 1H), 7.69 (*d*,  $J = 8.0$  Hz, 1H), 7.49 (*d*,  $J = 8.5$  Hz, 1H), 7.34 (*t*,  $J = 7.5$  Hz, 2H), 7.28 (*t*,  $J = 7.5$  Hz, 1H), 7.19 (*d*,  $J = 7.5$  Hz, 2H), 5.46 (*s*, 2H), 3.34-3.39 (*m*, 2H), 1.99 (*t*,  $J = 9.0$  Hz, 2H), 1.71-1.74 (*m*, 2H), 1.61-1.66 (*m*, 2H). <sup>13</sup>C-NMR (125 MHz, DMSO-*d*<sub>6</sub>,  $\delta$  ppm): 168.8, 154.9, 142.5, 138.5, 135.8, 128.8, 127.8, 126.9, 126.0, 123.9, 122.7, 122.5, 118.4, 114.8, 110.6, 46.9, 31.7, 31.5, 28.5, 24.1.

**5-((1-(2-Chlorobenzyl)-5-(trifluoromethyl)-1*H*-benzo[*d*]imidazol-2-yl)thio)-*N*-**

**hydroxypentanamide (6):** Yield 58% as white solid. Mp 166-168°C. FT-IR (KBr)  $\nu_{\max}$  (cm<sup>-1</sup>): 3407, 3242, 3074, 2928, 1629, 1331, 1102, 740. HR-ESI-MS found  $m/z$  458.0916 [M+H]<sup>+</sup> (calcd. 458.0839, C<sub>20</sub>H<sub>19</sub>ClF<sub>3</sub>N<sub>3</sub>O<sub>2</sub>S). <sup>1</sup>H-NMR (600 MHz, DMSO-*d*<sub>6</sub>,  $\delta$  ppm): 10.33 (*s*, 1H), 8.66 (*s*, 1H), 7.97 (*s*, 1H), 7.61 (*d*,  $J = 8.4$  Hz, 1H), 7.54 (*dd*,  $J_1 = 7.8$  Hz,  $J_2 = 1.2$  Hz, 1H), 7.49 (*dd*,  $J_1 = 8.4$  Hz,  $J_2 = 1.2$  Hz, 1H), 7.34 (*td*,  $J_1 = 7.8$  Hz,  $J_2 = 1.2$  Hz, 1H), 7.25 (*td*,  $J_1 = 7.8$  Hz,  $J_2 = 1.2$  Hz, 1H), 6.61 (*d*,  $J = 7.2$  Hz, 1H), 5.54 (*s*, 2H), 3.33 (*s*, 2H), 1.97 (*t*,  $J = 7.2$  Hz, 2H), 1.67-1.71 (*m*, 2H), 1.58-1.62 (*m*, 2H). <sup>13</sup>C-NMR (125 MHz, DMSO-*d*<sub>6</sub>,  $\delta$  ppm): 168.8, 155.2, 142.5, 138.7, 132.9, 131.8, 129.7, 129.6, 127.8, 127.6, 126.0, 123.9, 122.9, 122.7, 118.7, 114.9, 110.5, 44.9, 31.7, 31.5, 28.5, 24.1.

**5-((1-(2-Chlorobenzyl)-1*H*-benzo[*d*]imidazol-2-yl)thio)-*N*-hydroxypentanamide (7):** Yield 57% as white solid. Mp 150-152°C. FT-IR (KBr)  $\nu_{\max}$  (cm<sup>-1</sup>): 3417, 3186, 2930, 1649, 1445, 1052, 745. HR-ESI-MS found  $m/z$  390.1046 [M+H]<sup>+</sup> (calcd. 390.0965, C<sub>19</sub>H<sub>20</sub>ClN<sub>3</sub>O<sub>2</sub>S). <sup>1</sup>H-NMR (500

MHz, DMSO-*d*<sub>6</sub>,  $\delta$  ppm): 10.33 (*s*, 1H), 8.66 (*s*, 1H), 7.61 (*d*,  $J = 7.5$  Hz, 1H), 7.53 (*dd*,  $J_1 = 8.0$  Hz,  $J_2 = 1.0$  Hz, 1H), 7.37 (*d*,  $J = 7.5$  Hz, 1H), 7.32 (*td*,  $J_1 = 7.5$  Hz,  $J_2 = 1.5$  Hz, 1H), 7.23 (*t*,  $J = 7.5$  Hz, 1H), 7.13-7.20 (*m*, 2H), 6.56 (*dd*,  $J_1 = 7.5$  Hz,  $J_2 = 1.0$  Hz, 1H), 5.47 (*s*, 2H), 3.30-3.34 (*m*, 2H), 1.95-1.98 (*m*, 2H), 1.66-1.70 (*m*, 2H), 1.58-1.62 (*m*, 2H). <sup>13</sup>C-NMR (125 MHz, DMSO-*d*<sub>6</sub>,  $\delta$  ppm): 168.8, 151.9, 143.0, 136.3, 133.4, 131.6, 129.6, 129.4, 127.6, 127.4, 121.9, 121.8, 117.8, 109.6, 44.5, 31.7, 31.5, 28.6, 24.1.

**2-((1-Benzyl-1*H*-benzo[*d*]imidazol-2-yl)thio)-*N*-hydroxyacetamide (8):** Yield 58% as white solid. Mp 177-179°C. FT-IR (KBr)  $\nu_{\text{max}}$  (cm<sup>-1</sup>): 3251, 3035, 1663, 1420, 1382, 742, 727. HR-ESI-MS found *m/z* 314.0965 [M+H]<sup>+</sup> (calcd. 314.0885, C<sub>16</sub>H<sub>15</sub>N<sub>3</sub>O<sub>2</sub>S). <sup>1</sup>H-NMR (600 MHz, DMSO-*d*<sub>6</sub>,  $\delta$  ppm): 10.83 (*s*, 1H), 9.03 (*s*, 1H), 7.55-7.56 (*m*, 1H), 7.48-7.50 (*m*, 1H), 7.34 (*t*,  $J = 7.8$  Hz, 2H), 7.28 (*t*,  $J = 7.8$  Hz, 1H), 7.23 (*d*,  $J = 7.2$  Hz, 2H), 7.16-7.18 (*m*, 2H), 5.42 (*s*, 2H), 4.02 (*s*, 2H). <sup>13</sup>C-NMR (150 MHz, DMSO-*d*<sub>6</sub>,  $\delta$  ppm): 163.9, 150.9, 142.8, 136.3, 136.2, 128.7, 127.7, 127.1, 121.9, 121.7, 117.7, 109.9, 46.7, 33.3.

**2-((1-Benzyl-5-(trifluoromethyl)-1*H*-benzo[*d*]imidazol-2-yl)thio)-*N*-hydroxyacetamide (9):** Yield 65% as white solid. Mp 190-192°C. FT-IR (KBr)  $\nu_{\text{max}}$  (cm<sup>-1</sup>): 3261, 3086, 2850, 1667, 1430, 1330, 1100, 723. HR-ESI-MS found *m/z* 382.0841 [M+H]<sup>+</sup> (calcd. 382.0759, C<sub>17</sub>H<sub>14</sub>F<sub>3</sub>N<sub>3</sub>O<sub>2</sub>S). <sup>1</sup>H-NMR (600 MHz, DMSO-*d*<sub>6</sub>,  $\delta$  ppm): 10.83 (*s*, 1H), 9.05 (*s*, 1H), 7.89 (*s*, 1H), 7.72 (*d*,  $J = 8.4$  Hz, 1H), 7.51 (*dd*,  $J_1 = 7.8$  Hz,  $J_2 = 1.2$  Hz, 1H), 7.33-7.36 (*m*, 2H), 7.28-7.30 (*m*, 1H), 7.23 (*d*,  $J = 7.8$  Hz, 2H), 5.49 (*s*, 2H), 4.06 (*s*, 2H). <sup>13</sup>C-NMR (150 MHz, DMSO-*d*<sub>6</sub>,  $\delta$  ppm): 163.7, 154.3, 142.3, 138.6, 135.7, 128.8, 127.9, 127.1, 125.8, 124.0, 122.6, 118.7, 114.8, 110.8, 47.1, 33.4.

**2-((1-(2-Chlorobenzyl)-5-((difluoro- $\lambda^3$ -methyl)- $\lambda^2$ -fluoranyl)-1*H*-benzo[*d*]imidazol-2-yl)thio)-*N*-hydroxyacetamide (10):** Yield 59% as white solid. Mp 198-200°C. FT-IR (KBr)  $\nu_{\text{max}}$  (cm<sup>-1</sup>): 3264, 3065, 2841, 1666, 1447, 1328, 1103, 808, 746. HR-ESI-MS found *m/z* 416.0446 [M+H]<sup>+</sup> (calcd. 416.0369, C<sub>17</sub>H<sub>13</sub>ClF<sub>3</sub>N<sub>3</sub>O<sub>2</sub>S). <sup>1</sup>H-NMR (500 MHz, DMSO-*d*<sub>6</sub>,  $\delta$  ppm): 10.82 (*s*,

1H), 9.04 (s, 1H), 7.93 (s, 1H), 7.64 (d,  $J = 8.5$  Hz, 1H), 7.55 (dd,  $J_1 = 8.0$  Hz,  $J_2 = 0.5$  Hz, 1H), 7.51 (dd,  $J_1 = 8.3$  Hz,  $J_2 = 1.5$  Hz, 1H), 7.36 (td,  $J_1 = 7.8$  Hz,  $J_2 = 1.5$  Hz, 1H), 7.26 (td,  $J_1 = 7.5$  Hz,  $J_2 = 0.5$  Hz, 1H), 6.71 (d,  $J = 7.0$  Hz, 1H), 5.58 (s, 2H), 4.04 (s, 2H).  $^{13}\text{C}$ -NMR (125 MHz, DMSO- $d_6$ ,  $\delta$  ppm): 163.6, 154.6, 142.2, 138.8, 132.8, 131.9, 129.8, 129.7, 127.9, 127.8, 126.0, 123.8, 123.0, 122.8, 118.9, 114.9, 110.7, 45.1, 33.4.

**2-((1-(2-Chlorobenzyl)-1H-benzo[d]imidazol-2-yl)thio)-N-hydroxyacetamide (11):** Yield 57% as white solid. Mp 170-172°C. FT-IR (KBr)  $\nu_{\text{max}}$  ( $\text{cm}^{-1}$ ): 3418, 3236, 2854, 1664, 1380, 1052, 741. HR-ESI-MS found  $m/z$  348.0576  $[\text{M}+\text{H}]^+$  (calcd. 348.0495,  $\text{C}_{16}\text{H}_{14}\text{ClN}_3\text{O}_2\text{S}$ ).  $^1\text{H}$ -NMR (500 MHz, DMSO- $d_6$ ,  $\delta$  ppm): 10.80 (s, 1H), 9.02 (s, 1H), 7.59 (d,  $J = 7.5$  Hz, 1H), 7.54 (dd,  $J_1 = 8.0$  Hz,  $J_2 = 1.0$  Hz, 1H), 7.40 (d,  $J = 7.8$  Hz, 1H), 7.34 (td,  $J_1 = 7.8$  Hz,  $J_2 = 1.5$  Hz, 1H), 7.25 (dd,  $J_1 = 7.5$  Hz,  $J_2 = 1.0$  Hz, 1H), 7.15-7.23 (m, 2H), 6.66 (dd,  $J_1 = 7.0$  Hz,  $J_2 = 1.0$  Hz, 1H), 5.51 (s, 2H), 4.00 (s, 2H).  $^{13}\text{C}$ -NMR (125 MHz, DMSO- $d_6$ ,  $\delta$  ppm): 163.8, 151.2, 142.8, 136.3, 133.3, 131.7, 129.6, 129.5, 127.7, 127.6, 122.1, 121.9, 117.8, 109.7, 44.7, 33.4.

**2-(Benzo[d]oxazol-2-ylthio)-N-hydroxyacetamide (12):** Yield 43% as white solid. Mp 145-150°C. FT-IR (KBr)  $\nu_{\text{max}}$  ( $\text{cm}^{-1}$ ): 3635, 3158, 2853, 1650, 1493, 1242, 1143, 1052, 743, 573. HR-ESI-MS found  $m/z$  225.0332  $[\text{M}+\text{H}]^+$  (calcd. 225.0256,  $\text{C}_9\text{H}_8\text{N}_2\text{O}_3\text{S}$ ).  $^1\text{H}$ -NMR (500 MHz, DMSO- $d_6$ ,  $\delta$  ppm): 10.85 (s, 1H), 9.08 (s, 1H), 7.61-7.65 (m, 2H), 7.30-7.36 (m, 2H), 4.02 (s, 2H).  $^{13}\text{C}$ -NMR (125 MHz, DMSO- $d_6$ ,  $\delta$  ppm): 163.6, 163.2, 151.2, 141.1, 124.6, 124.3, 118.2, 110.2, 32.97.

**2-((5-Methylbenzo[d]oxazol-2-yl)thio)-N-hydroxyacetamide (13):** Yield 69% as white solid. Mp 135-140°C. FT-IR (KBr)  $\nu_{\text{max}}$  ( $\text{cm}^{-1}$ ): 3472, 3174, 2979, 1651, 1482, 1161, 1042, 795, 550. HR-ESI-MS found  $m/z$  239.045  $[\text{M}+\text{H}]^+$  (calcd. 239.0412,  $\text{C}_{10}\text{H}_{10}\text{N}_2\text{O}_3\text{S}$ ).  $^1\text{H}$ -NMR (500 MHz, DMSO- $d_6$ ,  $\delta$  ppm): 10.84 (s, 1H), 9.08 (s, 1H), 7.50 (d,  $J = 8.0$  Hz, 1H), 7.42 (s, 1H), 7.13 (dd,  $J_1$

= 8.0 Hz,  $J_2 = 0.5$  Hz, 1H), 4.04 (s, 2H), 2.40 (s, 3H).  $^{13}\text{C-NMR}$  (125 MHz, DMSO- $d_6$ ,  $\delta$  ppm): 163.4, 163.2, 149.5, 141.3, 134.0, 125.1, 118.1, 109.5, 32.9, 20.8.

**2-((5-Chlorobenzo[d]oxazol-2-yl)thio)-*N*-hydroxyacetamide (14):** Yield 18% as white solid. Mp 135-140°C. FT-IR (KBr)  $\nu_{\text{max}}$  ( $\text{cm}^{-1}$ ): 3382, 3159, 2980, 2854, 1654, 1452, 1222, 1149, 802, 561. HR-ESI-MS found  $m/z$  258.9943  $[\text{M}+\text{H}]^+$  (calcd. 258.9866,  $\text{C}_9\text{H}_7\text{ClN}_2\text{O}_3\text{S}$ ).  $^1\text{H-NMR}$  (500 MHz, DMSO- $d_6$ ,  $\delta$  ppm): 10.86 (s, 1H), 9.09 (s, 1H), 7.73 (d,  $J = 2.0$  Hz, 1H), 7.68 (d,  $J = 8.5$  Hz, 1H), 7.37 (dd,  $J_1 = 8.5$  Hz,  $J_2 = 2.0$  Hz, 1H), 4.04 (s, 2H).  $^{13}\text{C-NMR}$  (125 MHz, DMSO- $d_6$ ,  $\delta$  ppm): 165.6, 163.0, 150.0, 142.4, 128.9, 124.2, 117.9, 111.4, 33.0.

**(2-((5-Fluorobenzo[d]oxazol-2-yl)thio)-*N*-hydroxyacetamide (15):** Yield 42% as white solid. Mp 136-139°C. FT-IR (KBr)  $\nu_{\text{max}}$  ( $\text{cm}^{-1}$ ): 3303, 2945, 2915, 1630, 1500, 1476. HR-ESI-MS found  $m/z$  243.0239  $[\text{M}+\text{H}]^+$  (calcd. 243.0161,  $\text{C}_9\text{H}_7\text{FN}_2\text{O}_3\text{S}$ ).  $^1\text{H-NMR}$  (500 MHz, DMSO- $d_6$ ,  $\delta$  ppm): 10.87 (s, 1H), 9.10 (s, 1H), 7.68 (dd,  $J_1 = 9.0$  Hz,  $J_2 = 4.5$  Hz, 1H), 7.51 (dd,  $J_1 = 8.5$  Hz,  $J_2 = 2.5$  Hz, 1H), 7.18 (td,  $J_1 = 9.5$  Hz,  $J_2 = 2.5$ , 1H), 4.03 (s, 2H).  $^{13}\text{C-NMR}$  (125 MHz, DMSO- $d_6$ ,  $\delta$  ppm): 165.9, 163.1, 160.4, 158.5, 147.8, 142.1, 142.0, 111.6, 111.4, 111.0, 110.9, 105.1, 104.8, 33.0.

***N*-Hydroxy-2-((5-methoxybenzo[d]oxazol-2-yl)thio)acetamide (16):** Yield 50% as white solid. Mp 154-156°C. FT-IR (KBr)  $\nu_{\text{max}}$  ( $\text{cm}^{-1}$ ): 3224, 2992, 2836, 1659, 1478, 1440. HR-ESI-MS found  $m/z$  255.0438  $[\text{M}+\text{H}]^+$  (calcd. 255.0361,  $\text{C}_{10}\text{H}_{10}\text{N}_2\text{O}_4\text{S}$ ).  $^1\text{H-NMR}$  (600 MHz, DMSO- $d_6$ ,  $\delta$  ppm): 10.85 (s, 1H), 9.09 (s, 1H), 7.52 (d,  $J = 9.0$  Hz, 1H), 7.17 (d,  $J = 2.4$  Hz, 1H), 6.89 (dd,  $J_1 = 9.0$  Hz,  $J_2 = 2.4$  Hz, 1H), 3.99 (s, 2H), 3.79 (s, 3H).  $^{13}\text{C-NMR}$  (150 MHz, DMSO- $d_6$ ,  $\delta$  ppm): 164.1, 163.3, 157.0, 145.9, 142.2, 111.8, 110.3, 102.2, 55.8, 33.0.

**5-(Benzo[d]oxazol-2-ylthio)-*N*-hydroxypentanamide (17):** Yield 56% as white solid. Mp 115-116°C. FT-IR (KBr)  $\nu_{\text{max}}$  ( $\text{cm}^{-1}$ ): 3458, 3247, 2905, 1721, 1649, 1494, 1458. HR-ESI-MS found  $m/z$  267.0805  $[\text{M}+\text{H}]^+$  (calcd. 267.0725,  $\text{C}_{12}\text{H}_{14}\text{N}_3\text{O}_2\text{S}$ ).  $^1\text{H-NMR}$  (500 MHz, DMSO- $d_6$ ,  $\delta$  ppm): 10.35 (s, 1H), 8.67 (s, 1H), 7.63-7.65 (m, 2H), 7.29-7.35 (m, 2H), 3.33 (s, 2H), 2.01 (t,  $J = 7.5$  Hz,

2H), 1.76 (quin,  $J = 7.5$  Hz, 2H), 1.65 (quin,  $J = 7.5$  Hz, 2H).  $^{13}\text{C}$ -NMR (125 MHz, DMSO- $d_6$ ,  $\delta$  ppm): 168.7, 164.4, 151.2, 141.3, 124.5, 124.2, 118.2, 110.1, 31.6, 31.4, 28.5, 24.1.

***N*-Hydroxy-5-((5-methylbenzo[d]oxazol-2-yl)thio)pentanamide (18)**: Yield 70% as white solid. Mp 136-138°C; FT-IR (KBr)  $\nu_{\text{max}}$  ( $\text{cm}^{-1}$ ): 3428, 3221, 2920, 1655, 1484. HR-ESI-MS found  $m/z$  281.9902  $[\text{M}+\text{H}]^+$  (calcd. 281.0882,  $\text{C}_{13}\text{H}_{16}\text{N}_3\text{O}_2\text{S}$ ).  $^1\text{H}$ -NMR (500 MHz, DMSO- $d_6$ ,  $\delta$  ppm): 10.35 (s, 1H), 8.67 (d,  $J = 1.0$  Hz, 1H), 7.50 (d,  $J = 8.5$  Hz, 1H), 7.44 (s, 1H), 7.12 (dd,  $J_1 = 8.5$  Hz,  $J_2 = 1.0$  Hz, 1H), 3.30 (2H), 2.40 (s, 3H), 2.01 (t,  $J = 7.5$  Hz, 2H), 1.76 (quin,  $J = 7.5$  Hz, 2H), 1.65 (quin,  $J = 7.5$  Hz, 2H).  $^{13}\text{C}$ -NMR (125 MHz, DMSO- $d_6$ ,  $\delta$  ppm): 168.7, 164.2, 149.4, 141.5, 133.9, 124.9, 118.1, 109.5, 31.6, 31.3, 28.5, 24.0, 20.9.

***N*-Hydroxy-5-((5-methoxybenzo[d]oxazol-2-yl)thio)pentanamide (19)**: Yield 57% as white solid. Mp 115-116°C. FT-IR (KBr)  $\nu_{\text{max}}$  ( $\text{cm}^{-1}$ ): 3458, 3247, 2905, 1721, 1649, 1494, 1458. HR-ESI-MS found  $m/z$  297.0908  $[\text{M}+\text{H}]^+$  (calcd. 297.8331,  $\text{C}_{13}\text{H}_{16}\text{N}_2\text{O}_4\text{S}$ ).  $^1\text{H}$ -NMR (600 MHz, DMSO- $d_6$ ,  $\delta$  ppm): 10.35 (s, 1H), 8.68 (s, 1H), 7.52 (d,  $J = 9.0$  Hz, 1H), 7.22 (d,  $J = 2.4$  Hz, 1H), 6.87 (dd,  $J_1 = 9.0$  Hz,  $J_2 = 2.4$  Hz, 1H), 3.79 (s, 3H), 3.30 (t,  $J = 6.6$  Hz, 2H), 2.00 (t,  $J = 7.2$  Hz, 2H), 1.75 (quin,  $J = 7.8$  Hz, 2H), 1.64 (quin,  $J = 7.8$  Hz, 2H).  $^{13}\text{C}$ -NMR (150 MHz, DMSO- $d_6$ ,  $\delta$  ppm): 168.7, 164.9, 156.9, 145.7, 142.2, 111.6, 110.2, 102.1, 55.8, 31.6, 31.4, 28.5, 24.1.

## **S2. Detailed description for docking studies**

The molecular docking study utilizes AutoDock4Zn with Lamarckian genetic algorithm (LGA) for searching the optimum dock pose together with scoring function to calculate the binding affinity. AutoDock Tools (ADT) was employed to set up and performed docking calculation.

In this study, we performed the docking study assuming that having a rigid protein and consider the conformational space of the ligands to analyze the inductive effect of the hybrid compounds. To turn the protein molecule into a free receptor, the heteroatoms including water molecules were deleted and polar hydrogen atoms and Kollman charges were added. All other bonds were allowed to be rotatable. In the docking analysis, the binding site was enclosed in a box with the number of grid points in  $x \times y \times z$  directions ( $64 \times 64 \times 64$ ) and a grid spacing of 0.375 Å. Initially, AutoGrid was run to generate the grid map of various atoms of the ligands and receptor. After the completion of the grid map, AutoDock was run by using autodock parameters as follows: GA population size, 300; maximum number of energy evaluations, 2 500 000; and the number of generations, 27 000. A maximum of 50 conformers were considered for each molecule, and the root-mean-square (RMS) cluster tolerance was set to 2.0 Å in each run.

The outputs from AutoDock modeling studies were analyzed using PyMOL, Discovery Studio Visualizer. PyMOL was used to calculate the distances of hydrogen bonds as measured between the hydrogen and its assumed binding partner.

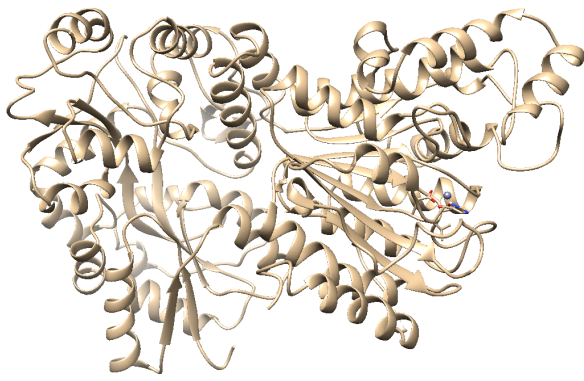

(A)

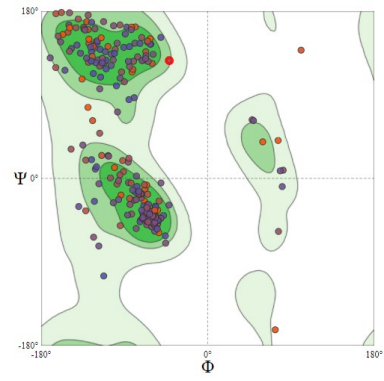

(B)

**Figure S2.1.** (A) Swiss-Model of HDAC11; (B) Ramachandran plot analysis of the structure of HDAC11 model

### S3. Scanned NMR spectra of compounds (1-19)

PerkinElmer Spectrum 10.5.2

December 21, 2020 4:56

#### Report Details

Report Location C:\Users\Administrator\Desktop\TTPT\21122  
 0\NH5a-C12H15N3O2S  
 Report Creator Analyst  
 Report Date December 21, 2020 4:56

#### Sample Details

Filename C:\Users\Administrator\Desktop\TTPT\21122  
 20\NH5a-C12H15N3O2S.sp  
 Creation Date 12/21/2020 2:02:32 PM  
 Analyst Analyst  
 X-Axis Units cm-1  
 X-Axis start value 4000  
 X-Axis end value 400  
 Data interval -1  
 Number of points 3601  
 Y-Axis Units %T  
 Description Sample 751 By Analyst Date Monday,  
 December 21 2020  
 Pathlength (mm) 1

#### Spectrum

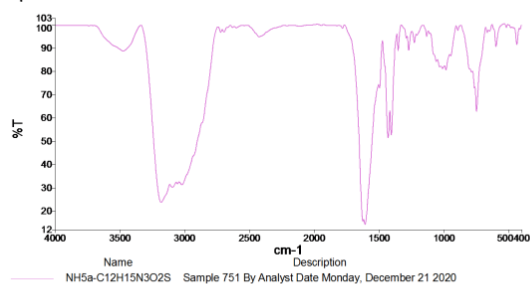

#### Peak Table Results

Result Spectrum

Figure S3.1 IR spectrum of compound 1

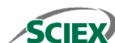

Created with SCIEX OS 1.2

CENTER FOR RESEARCH AND TECHNOLOGY TRANSFER  
 PHARMACEUTICAL CHEMISTRY LABORATORY  
 01, Mac Dinh Chi St., Dist 1, Ho Chi Minh City, Vietnam. Phone: (84) 907 070 939

#### ANALYSIS REPORT

##### Injection details

|                  |                        |                    |              |
|------------------|------------------------|--------------------|--------------|
| Sample name      | NH5a                   | Vial position      | 26           |
| Sample file name | SER_wiff2 - HUE        | Inject volume      | 5.00         |
| Acquisition date | 04/11/2020 10:59:41 AM | Acquisition method | ESI_POS_SCAN |
| Operator         | CB21261708             | Instrument name    | X500s QTOF   |

##### Full mass spectrum

Spectrum from NH5a\_01ESI 2020-11-04-10-59-41 wiff2 (sample 1) - NH5a\_11ESI\_1TOF MS...m 0.157 min, noise filtered (noise multiplier = 1.5), Gaussian smoothed (0.5 points)

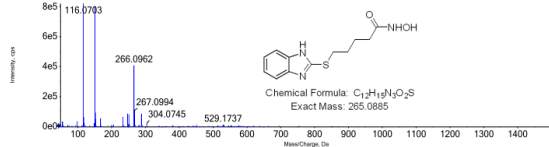

##### Expanded spectrum

Spectrum from NH5a\_01ESI 2020-11-04-10-59-41 wiff2 (sample 1) - NH5a\_11ESI\_1TOF MS...m 0.157 min, noise filtered (noise multiplier = 1.5), Gaussian smoothed (0.5 points)

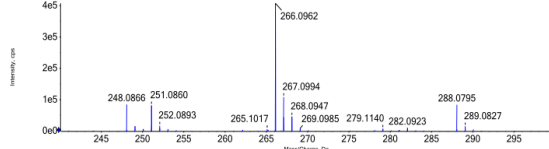

##### Molecular formula prediction

Figure S3.2 MS spectrum of compound 1



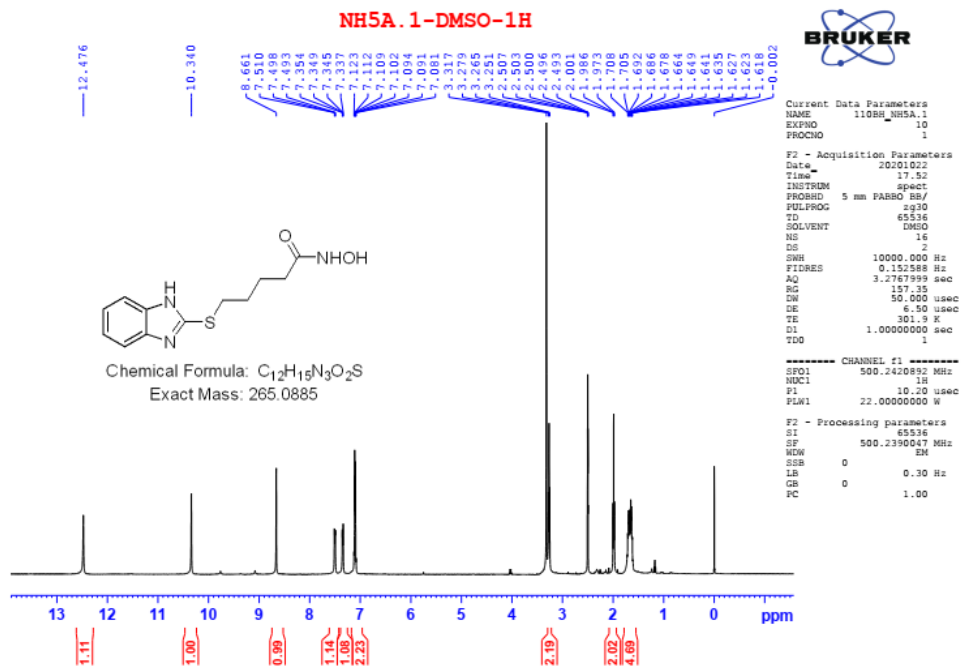

Figure S3.3 <sup>1</sup>H-NMR spectrum of compound 1

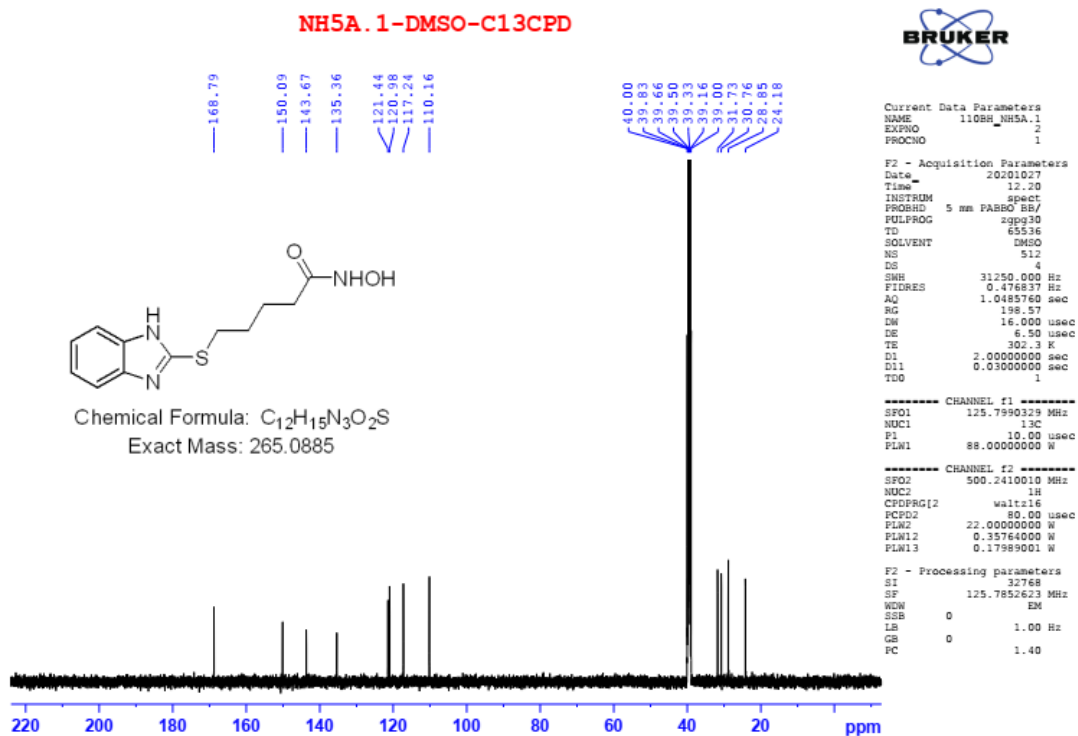

Figure S3.4 <sup>13</sup>C-NMR spectrum of compound 1

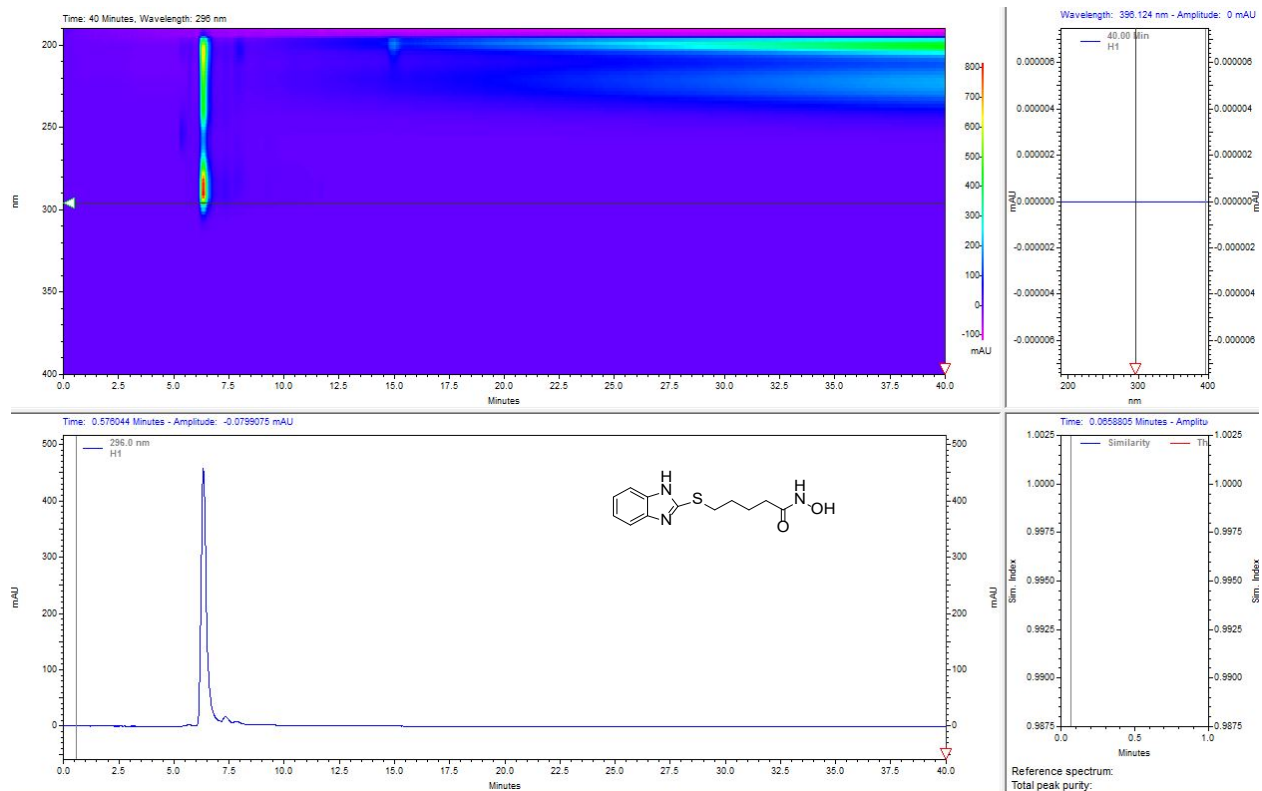

Figure S3.5 HPLC spectrum of compound 1

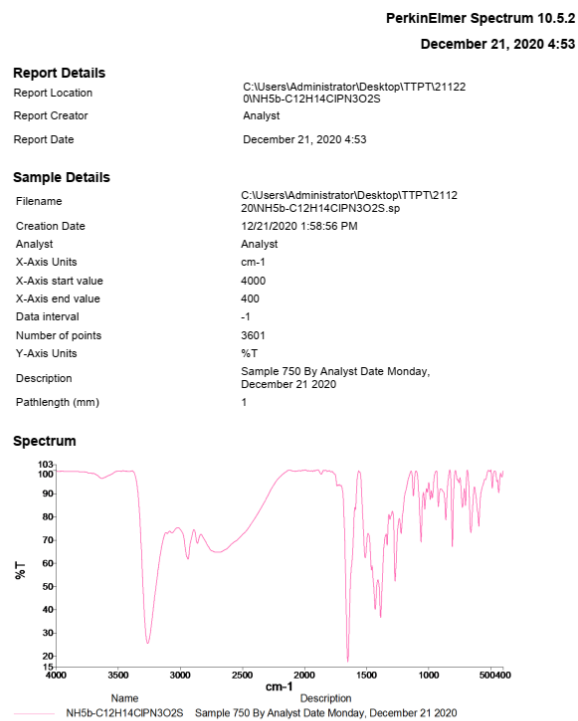

Peak Table Results  
Result Spectrum

Figure S3.6 IR spectrum of compound 2

**ANALYSIS REPORT**

| Injection details |                        |                    |              |
|-------------------|------------------------|--------------------|--------------|
| Sample name       | NH5b                   | Vial position      | 21           |
| Sample file name  | SER_wiif2 - HUE        | Inject volume      | 5.00         |
| Acquisition date  | 04/11/2020 10:45:15 AM | Acquisition method | ESI_POS_SCAN |
| Operator          | CB21261708             | Instrument name    | X500r QTOF   |

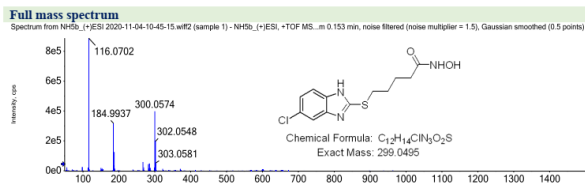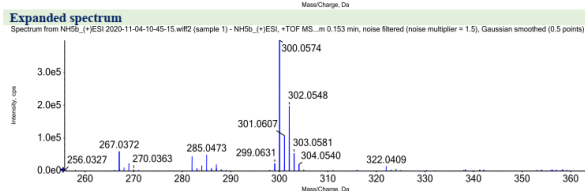

**Molecular formula prediction**

**Figure S3.7 MS spectrum of compound 2**

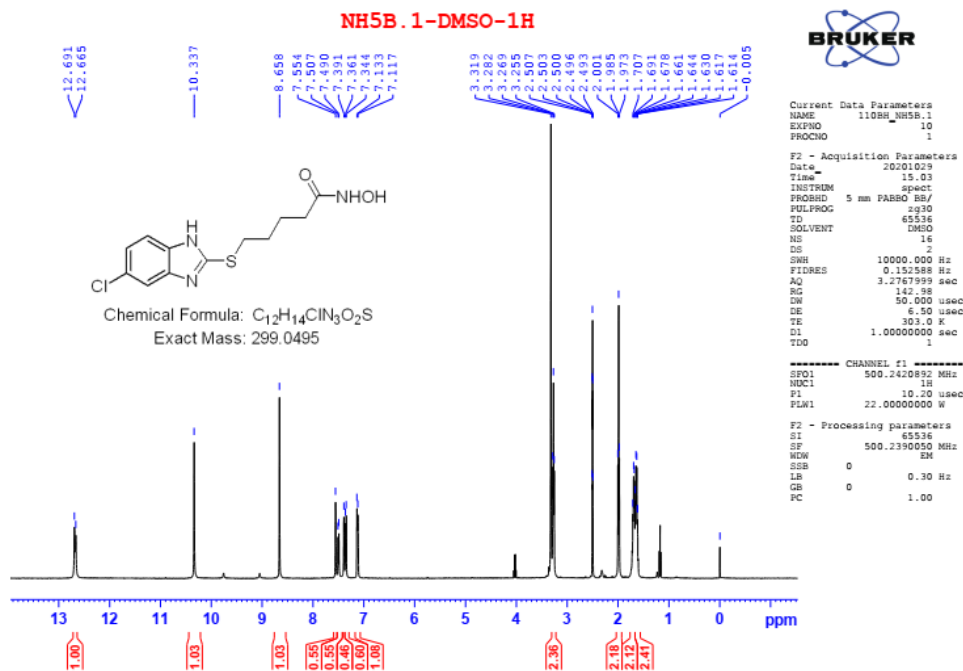

**Figure S3.8 <sup>1</sup>H-NMR spectrum of compound 2**

NH5B.1-DMSO-C13CPD

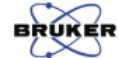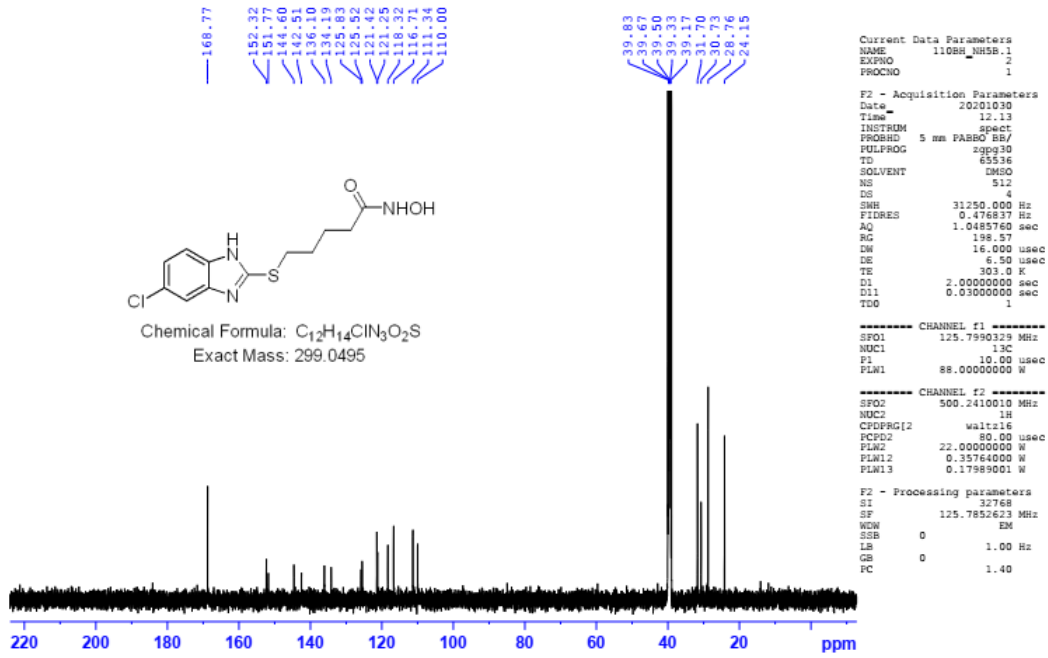

Figure S3.9  $^{13}C$ -NMR spectrum of compound 2

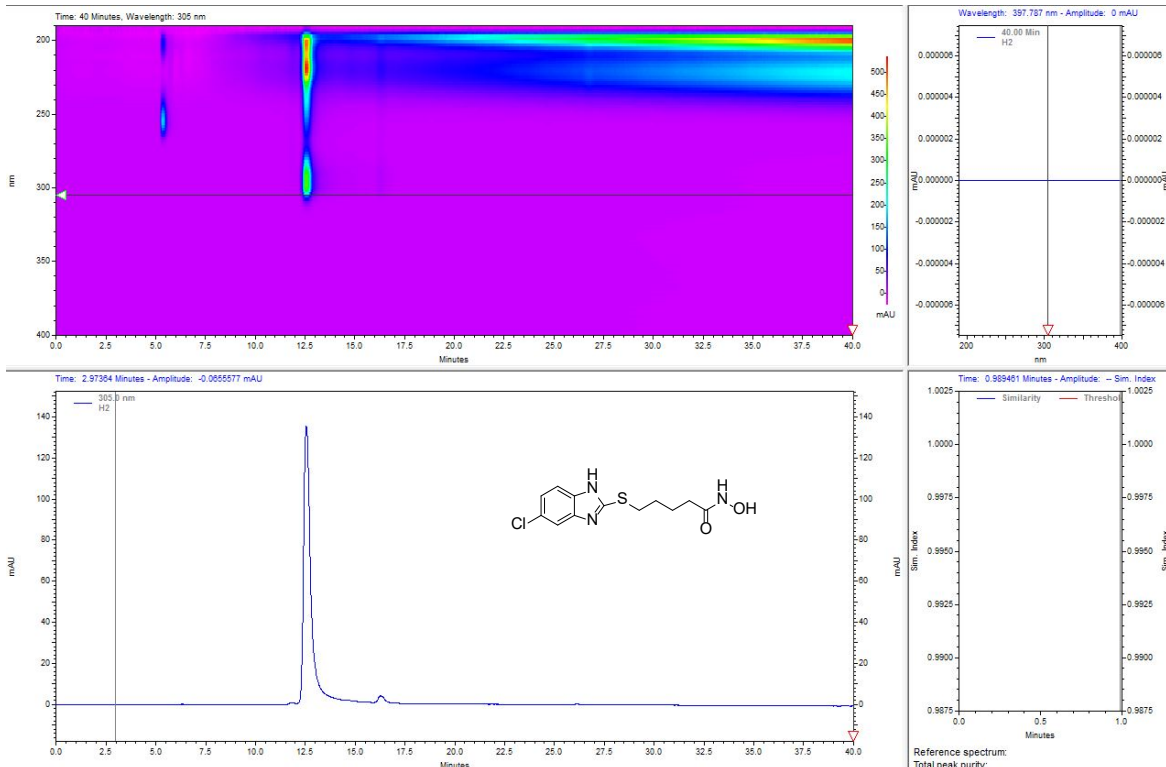

Figure S3.10 HPLC spectrum of compound 2

December 21, 2020 4:52

**Report Details**  
 Report Location C:\Users\Administrator\Desktop\TTP121122  
 Report Creator 0\NH5c-C13H17N3O3S  
 Analyst  
 Report Date December 21, 2020 4:52

**Sample Details**  
 Filename C:\Users\Administrator\Desktop\TTP121122  
 20\NH5c-C13H17N3O3S.sp  
 Creation Date 12/21/2020 1:55:11 PM  
 Analyst Analyst  
 X-Axis Units cm-1  
 X-Axis start value 4000  
 X-Axis end value 400  
 Data interval -1  
 Number of points 3801  
 Y-Axis Units %T  
 Description Sample 749 By Analyst Date Monday,  
 December 21 2020  
 Pathlength (mm) 1

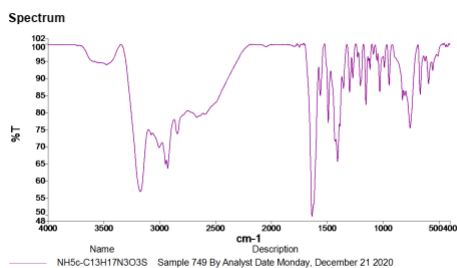

**Peak Table Results**  
 Result Spectrum

**Figure S3.11** IR spectrum of compound 3

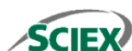

Created with SCIEX OS 1.2

**CENTER FOR RESEARCH AND TECHNOLOGY TRANSFER**  
**PHARMACEUTICAL CHEMISTRY LABORATORY**  
 01, Mac Dinh Chi St., Dist 1, Ho Chi Minh City, Vietnam. Phone: (84) 907 070 939

### ANALYSIS REPORT

| Injection details |                        |                    |              |
|-------------------|------------------------|--------------------|--------------|
| Sample name       | NH5c                   | Vial position      | 22           |
| Sample file name  | SER_wiff2 - HUE        | Inject volume      | 5.00         |
| Acquisition date  | 04/11/2020 10:48:30 AM | Acquisition method | ESI_POS_SCAN |
| Operator          | CB21261708             | Instrument name    | X500R QTOF   |

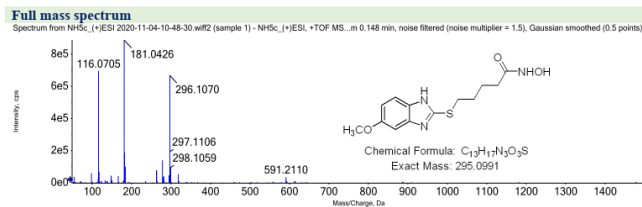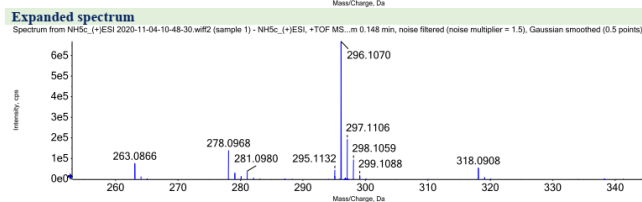

**Molecular formula prediction**

**Figure S3.12** MS spectrum of compound 3

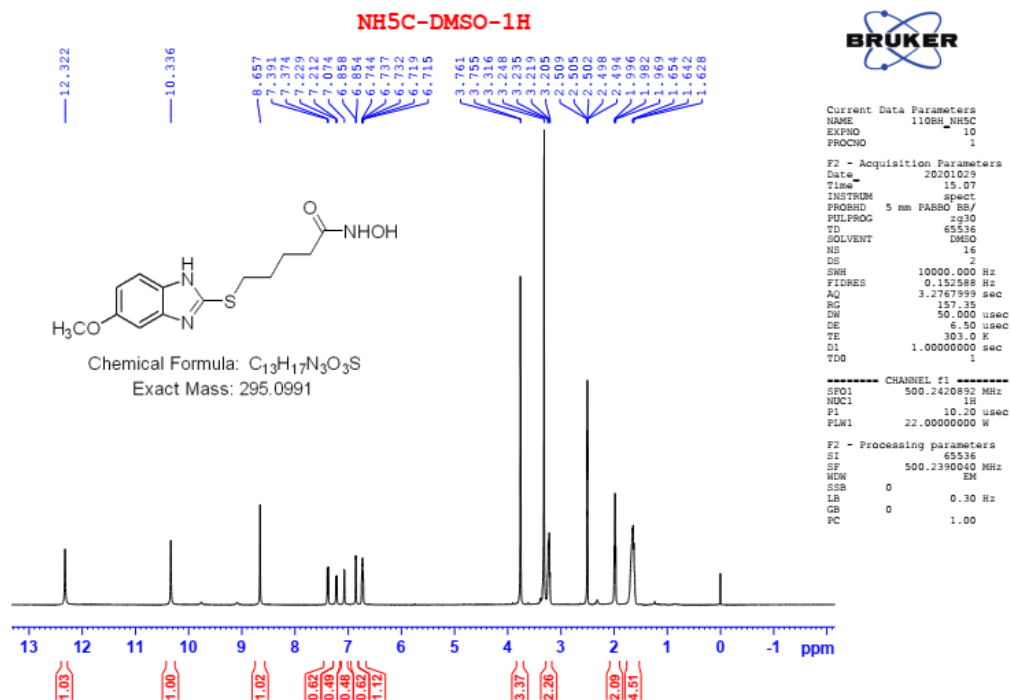

Figure S3.13  $^1\text{H}$ -NMR spectrum of compound 3

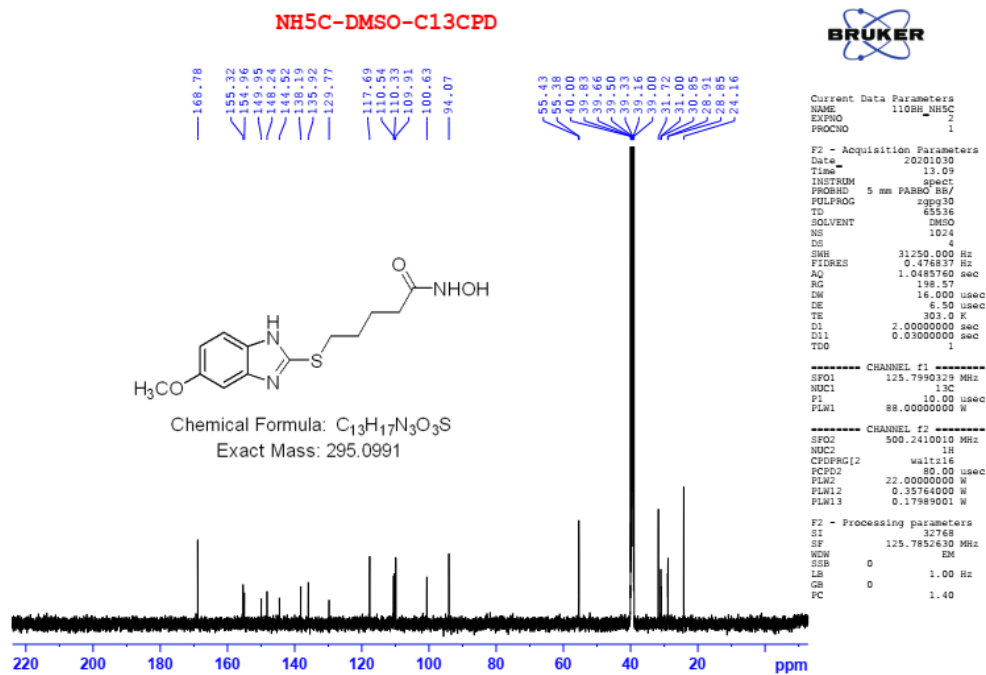

Figure S3.14  $^{13}\text{C}$ -NMR spectrum of compound 3

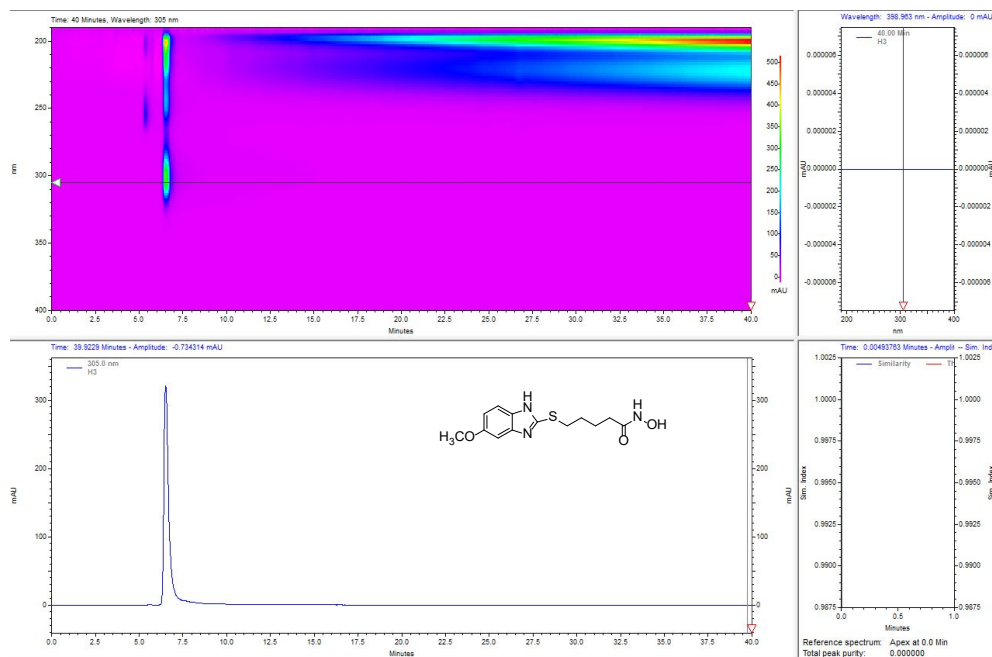

Figure S3.15 HPLC spectrum of compound 3

PerkinElmer Spectrum 10.5.2

May 14, 2021 5:05

Report Details

Report Location C:\Users\Administrator\Desktop\TTPTKQ  
 2021\1140521\H11b C19H21N3O2S  
 Report Creator Administrator  
 Report Date May 14, 2021 5:05

Sample Details

Filename C:\Users\Administrator\Desktop\TTPTKQ  
 2021\1140521\H11b C19H21N3O2S.sp  
 Creation Date 5/14/2021 3:04:12 PM  
 Analyst Administrator  
 X-Axis Units cm-1  
 X-Axis start value 4000  
 X-Axis end value 400  
 Data interval -1  
 Number of points 3601  
 Y-Axis Units %T  
 Description Sample 246 By Administrator Date Friday,  
 May 14 2021

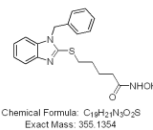

Spectrum

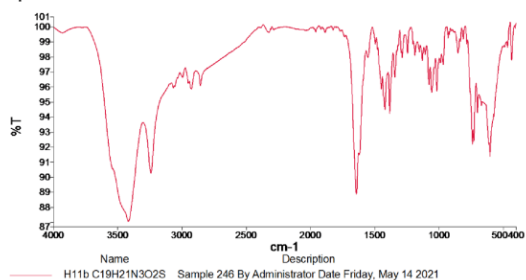

Figure S3.16 IR spectrum of compound 4

### ANALYSIS REPORT

| Injection details |                        |                    |              |
|-------------------|------------------------|--------------------|--------------|
| Sample name       | H11B                   | Vial position      | 41           |
| Sample file name  | SER_wi02 - HUE         | Inject volume      | 5.00         |
| Acquisition date  | 21/05/2021 14:01:58 PM | Acquisition method | ESI_POS_SCAN |
| Operator          | CB21261708             | Instrument name    | X500R QTOF   |

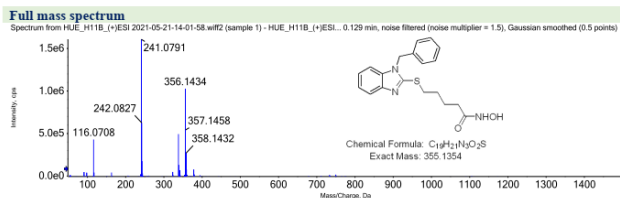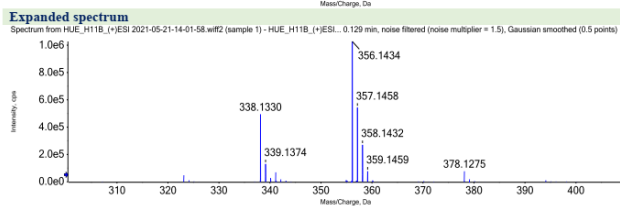

Figure S3.17 MS spectrum of compound 4

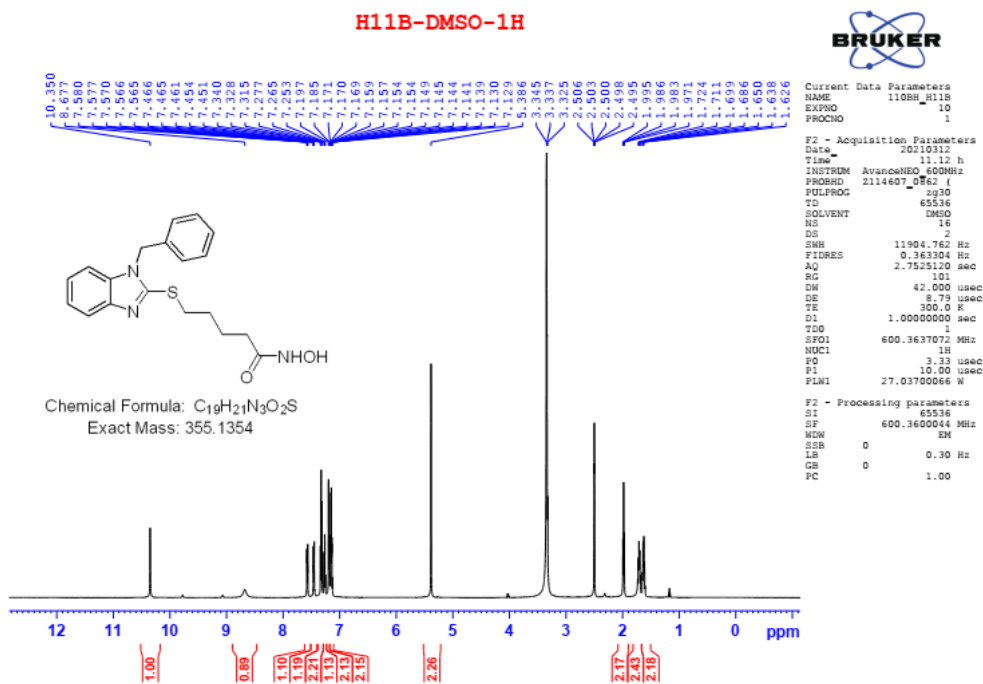

Figure S3.18  $^1H$ -NMR spectrum of compound 4



H11B-DMSO-C13CPD

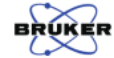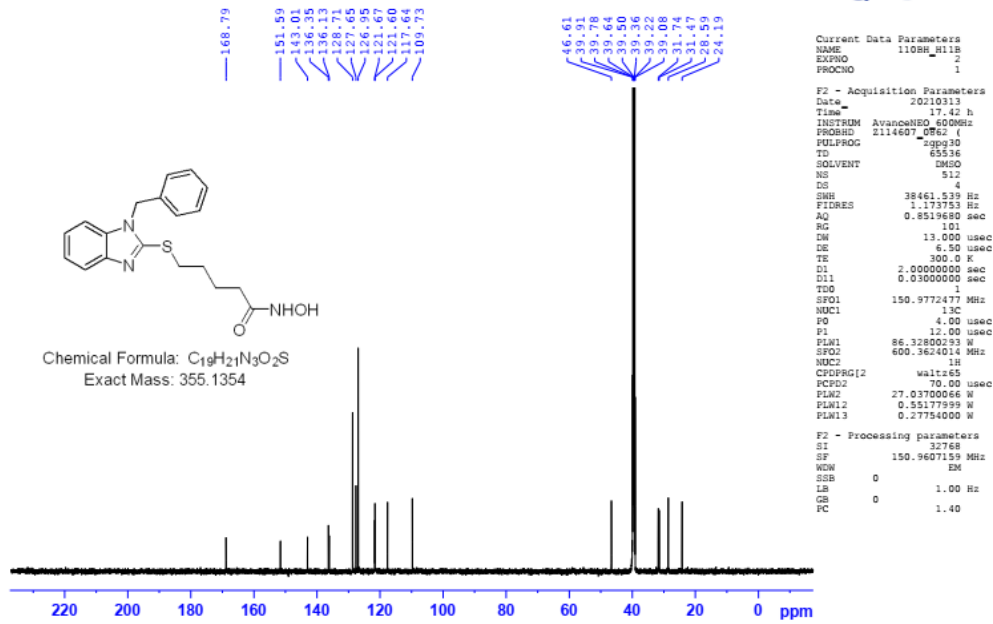

Figure S3.19 <sup>13</sup>C-NMR spectrum of compound 4

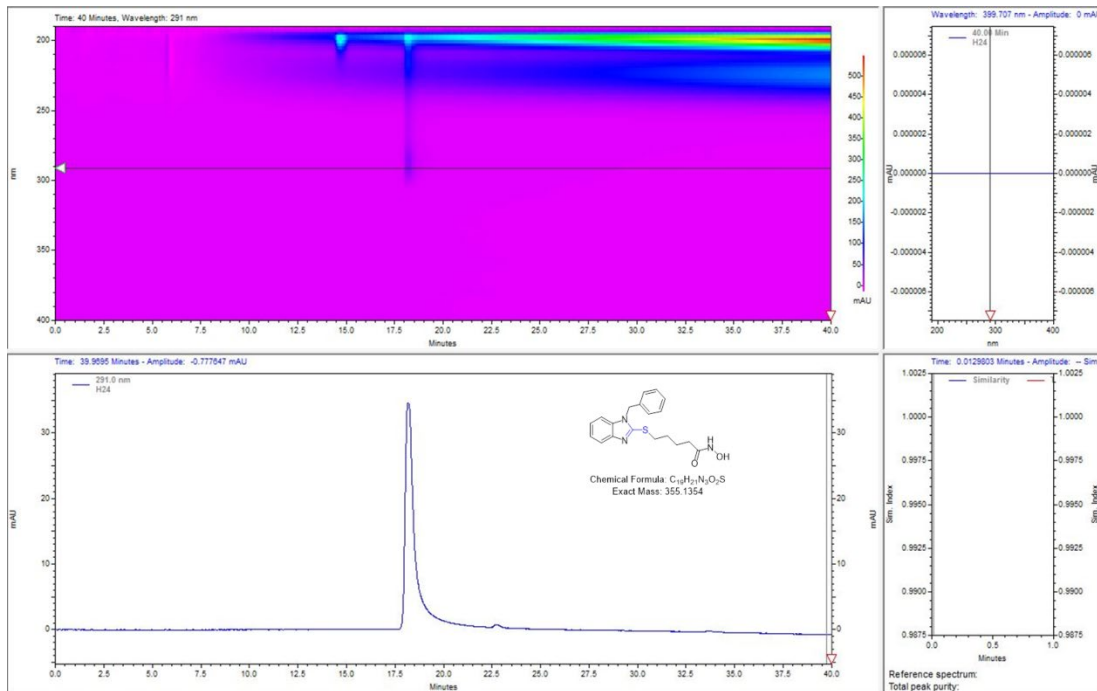

Figure S3.20 HPLC spectrum of compound 4

May 14, 2021 5:09

## Report Details

Report Location C:\Users\Administrator\Desktop\TTPTKQ  
 2021\140521H11d C20H20F3N3O2S  
 Report Creator Administrator  
 Report Date May 14, 2021 5:09

## Sample Details

Filename C:\Users\Administrator\Desktop\TTPTKQ  
 2021\140521H11d C20H20F3N3O2S.sp  
 Creation Date 5/14/2021 12:58:36 PM  
 Analyst Administrator  
 X-Axis Units cm-1  
 X-Axis start value 4000  
 X-Axis end value 400  
 Data interval -1  
 Number of points 3601  
 Y-Axis Units %T  
 Description Sample 238 By Administrator Date Friday,  
 May 14 2021

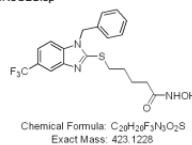

## Spectrum

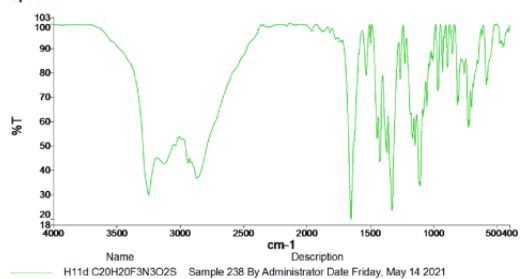

Figure S3.21 IR spectrum of compound 5

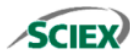

Created with SCIEX OS 1.2

**CENTER FOR RESEARCH AND TECHNOLOGY TRANSFER**  
**PHARMACEUTICAL CHEMISTRY LABORATORY**  
 1B, Thanh Loc 29 St., Dist 12, Ho Chi Minh City, Vietnam. Phone: (84) 907 070 939

## ANALYSIS REPORT

## Injection details

|                  |                        |                    |              |
|------------------|------------------------|--------------------|--------------|
| Sample name      | H11D                   | Vial position      | 43           |
| Sample file name | SER. wiff2 - HUE       | Inject volume      | 5.00         |
| Acquisition date | 21/05/2021 14:05:07 PM | Acquisition method | ESI_POS_SCAN |
| Operator         | CB21261708             | Instrument name    | X500g QTOF   |

## Full mass spectrum

Spectrum from HUE\_H11D\_14(ESI) 2021-05-21-14-05-07 wiff2 (sample 1) - HUE\_H11D\_14(ESI). 0.194 min, noise filtered (noise multiplier = 1.5), Gaussian smoothed (0.5 points)

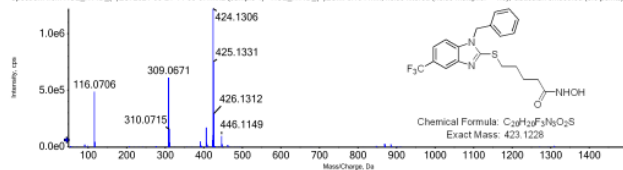

## Expanded spectrum

Spectrum from HUE\_H11D\_14(ESI) 2021-05-21-14-05-07 wiff2 (sample 1) - HUE\_H11D\_14(ESI). 0.194 min, noise filtered (noise multiplier = 1.5), Gaussian smoothed (0.5 points)

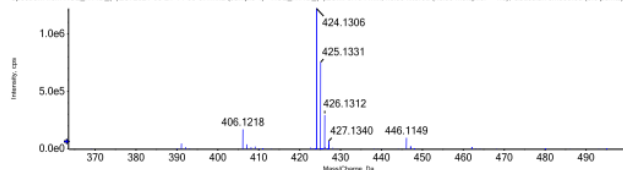

Figure S3.22 MS spectrum of compound 5

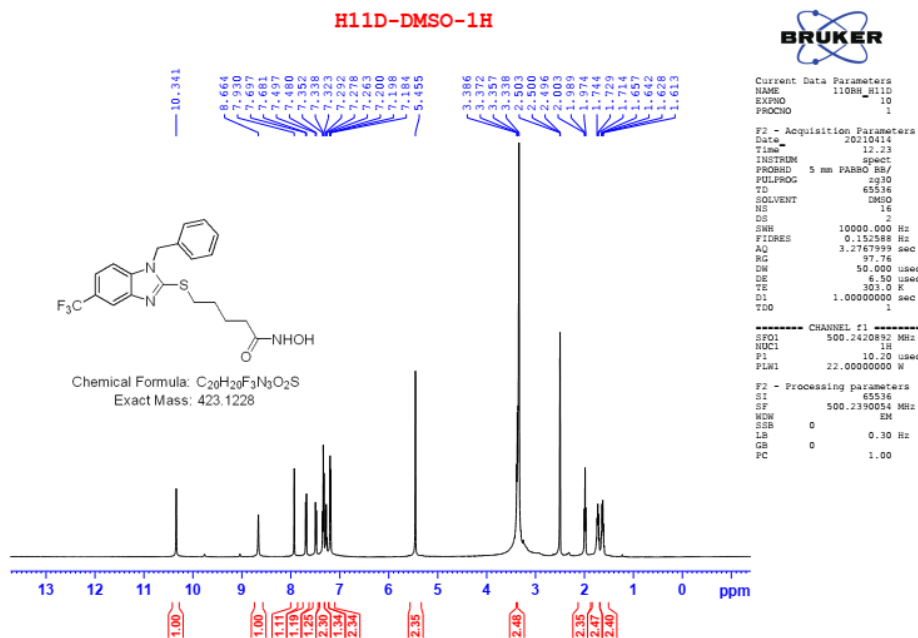

Figure S3.23  $^1\text{H}$ -NMR spectrum of compound 5

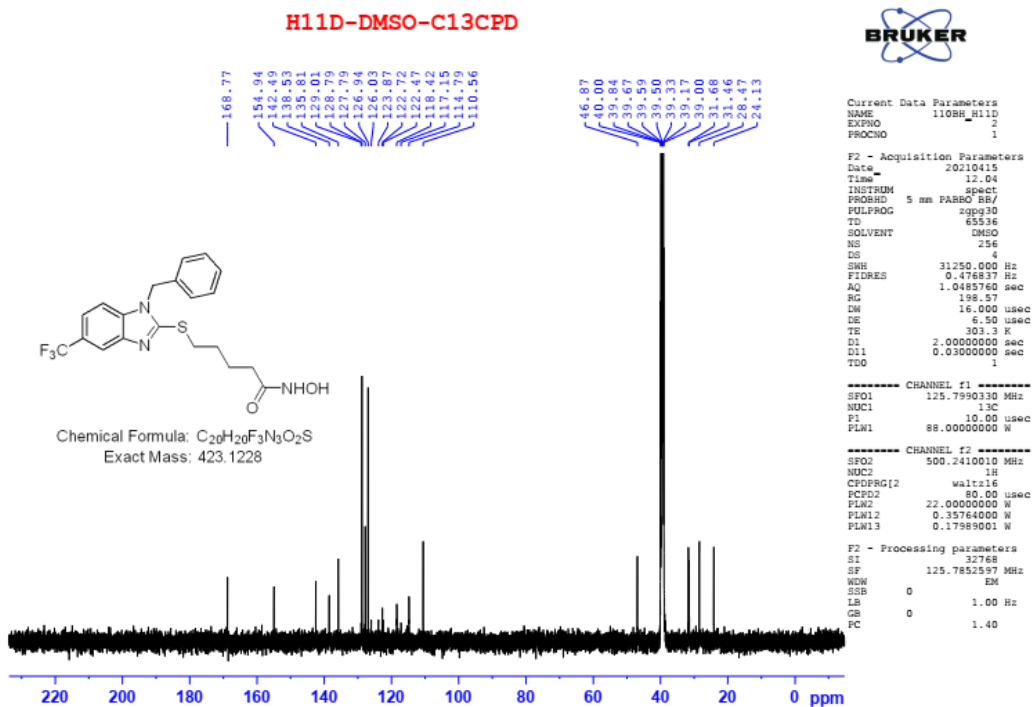

Figure S3.24  $^{13}\text{C}$ -NMR spectrum of compound 5

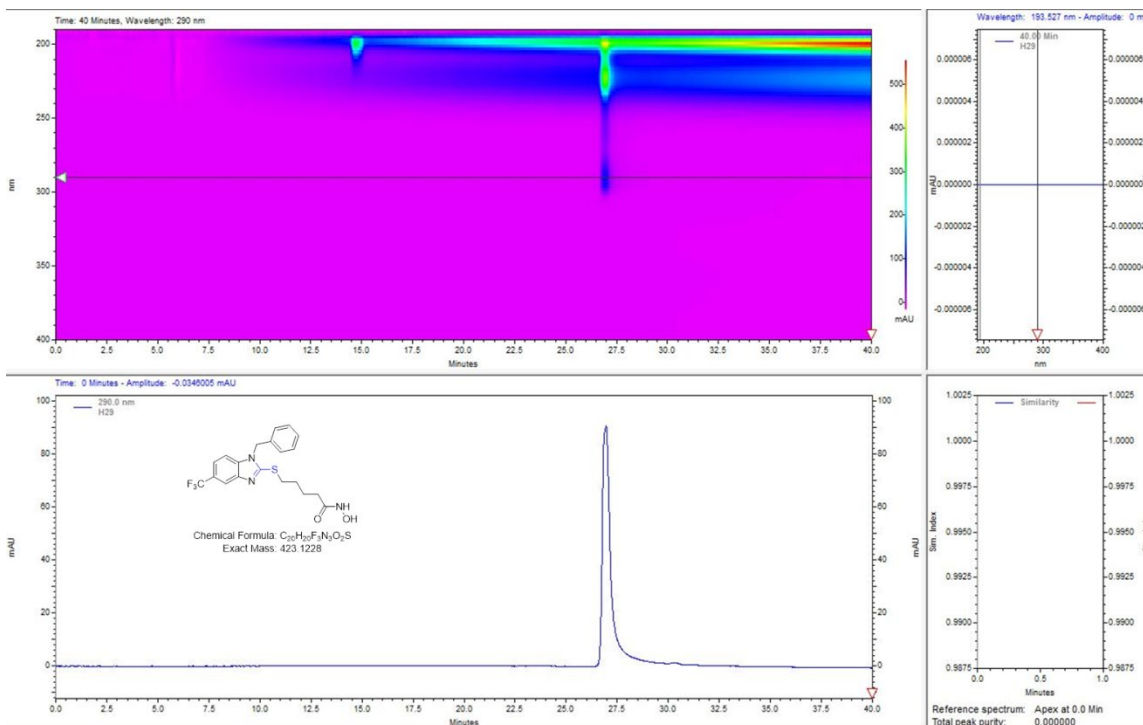

Figure S3.25 HPLC spectrum of compound 5

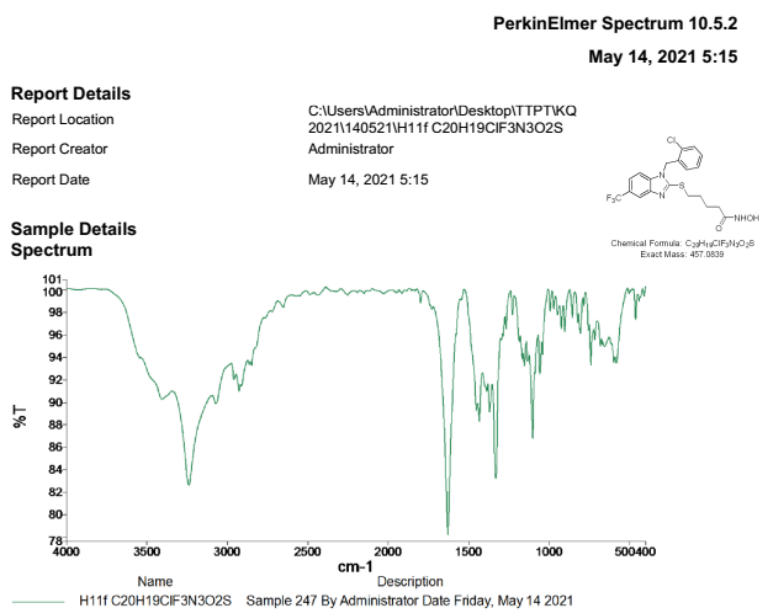

Figure S3.26 IR spectrum of compound 6

### ANALYSIS REPORT

**Injection details**

|                         |                        |                           |              |
|-------------------------|------------------------|---------------------------|--------------|
| <i>Sample name</i>      | H11F                   | <i>Vial position</i>      | 45           |
| <i>Sample file name</i> | SER_wiff2 - HUE        | <i>Inject volume</i>      | 5.00         |
| <i>Acquisition date</i> | 21/05/2021 14:15:45 PM | <i>Acquisition method</i> | ESI_POS_SCAN |
| <i>Operator</i>         | CB21261708             | <i>Instrument name</i>    | X500R QTOF   |

**Full mass spectrum**
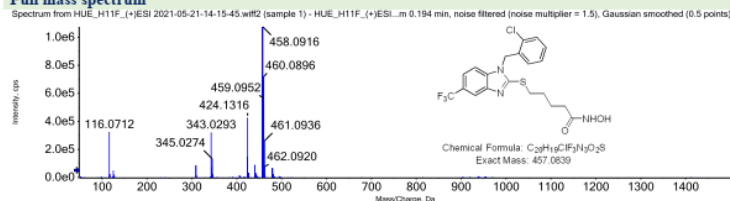
**Expanded spectrum**
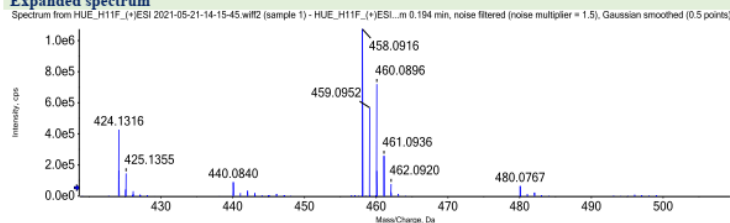

Figure S3.27 MS spectrum of compound 6

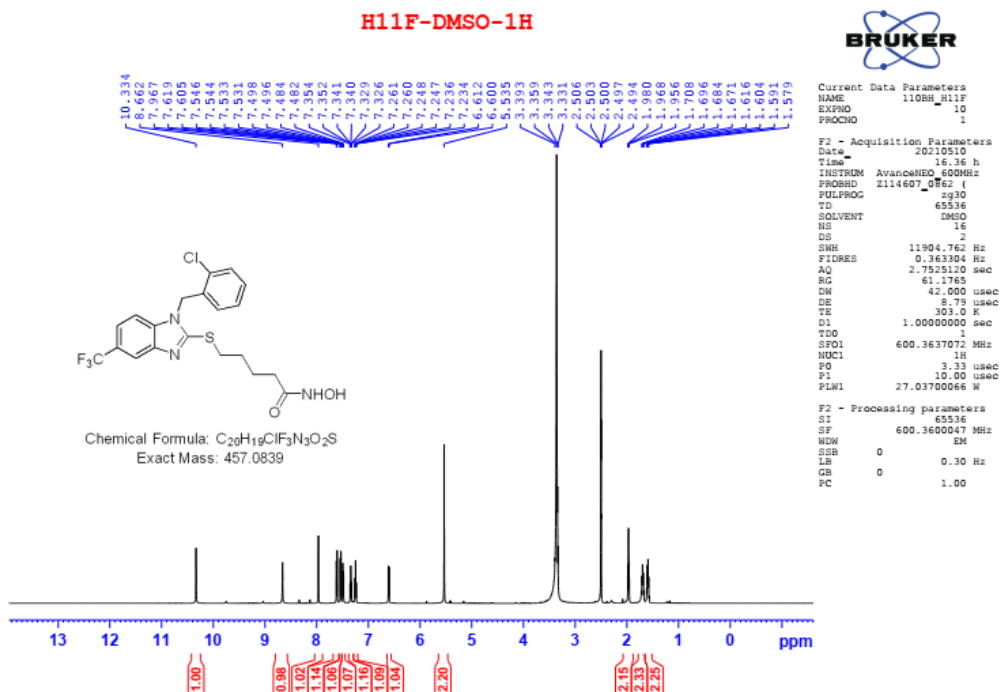

Figure S3.28  $^1\text{H-NMR}$  spectrum of compound 6

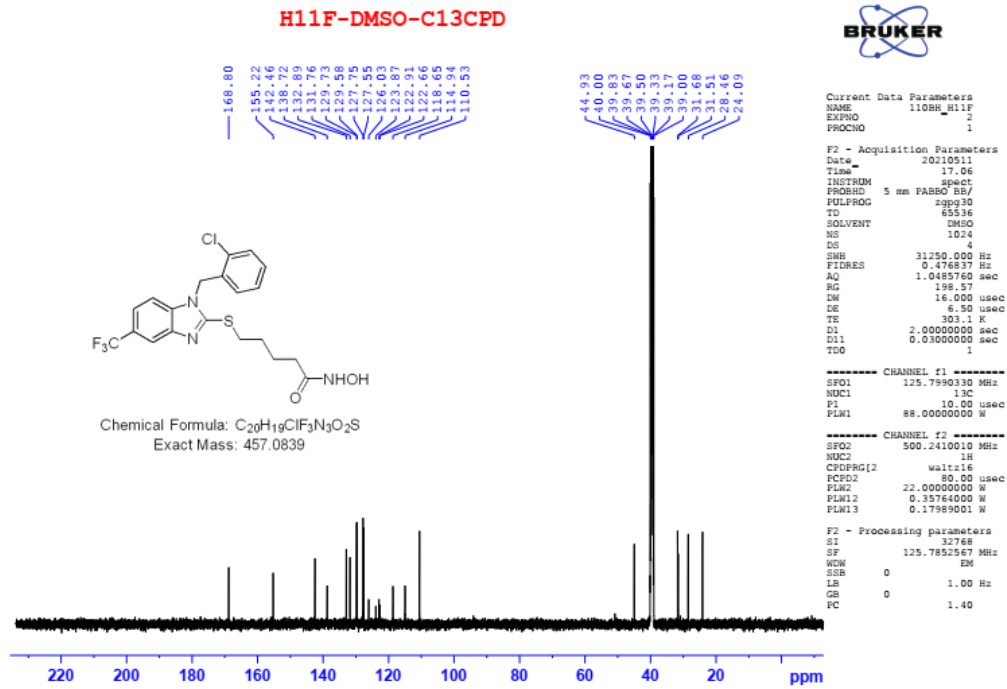

Figure S3.29  $^{13}C$ -NMR spectrum of compound 6

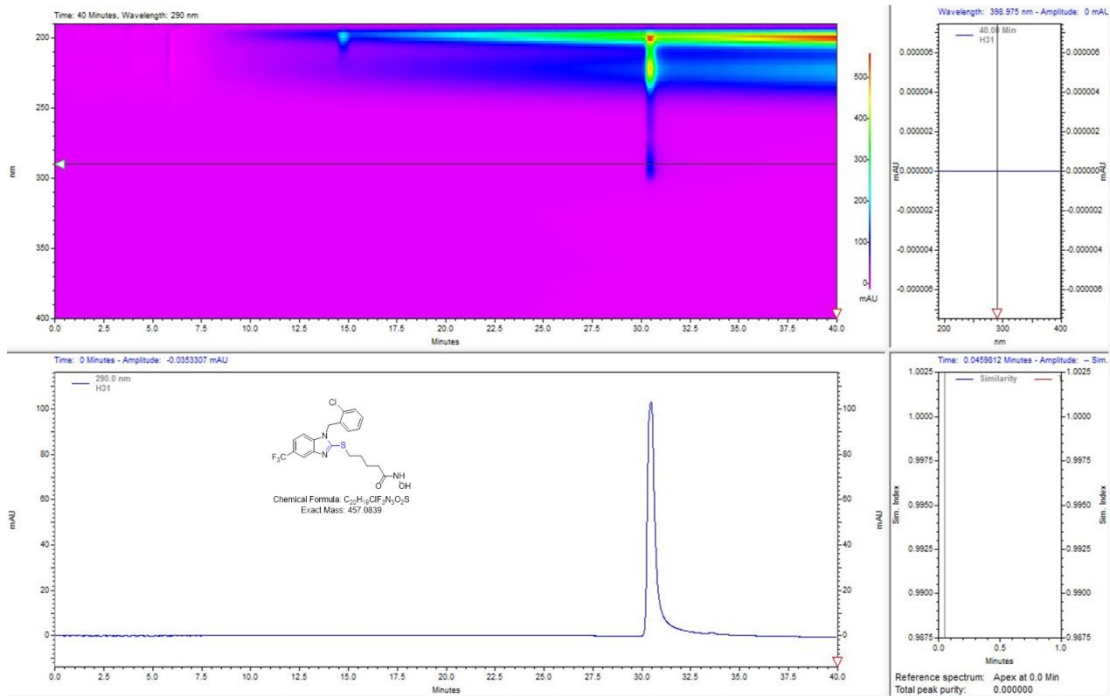

Figure S3.30 HPLC spectrum of compound 6

May 14, 2021 5:19

## Report Details

Report Location C:\Users\Administrator\Desktop\TTPTKQ  
 2021\140521\H11h C19H20ClN3O2S  
 Report Creator Administrator  
 Report Date May 14, 2021 5:19

## Sample Details

Filename C:\Users\Administrator\Desktop\TTPTKQ  
 2021\140521\H11h C19H20ClN3O2S.sp  
 Creation Date 5/14/2021 1:20:16 PM  
 Analyst Administrator  
 X-Axis Units cm-1  
 X-Axis start value 4000  
 X-Axis end value 400  
 Data interval -1  
 Number of points 3601  
 Y-Axis Units %T  
 Description Sample 244 By Administrator Date Friday,  
 May 14 2021

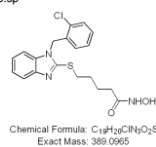

## Spectrum

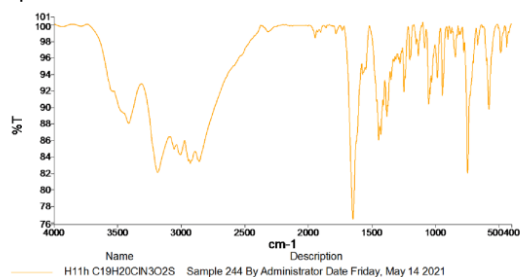

Figure S3.31 IR spectrum of compound 7

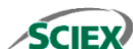

Created with SCIEX OS 1.2

**CENTER FOR RESEARCH AND TECHNOLOGY TRANSFER**  
**PHARMACEUTICAL CHEMISTRY LABORATORY**  
 1B, Thanh Loc 29 St., Dist 12, Ho Chi Minh City, Vietnam. Phone: (84) 907 070 939

## ANALYSIS REPORT

## Injection details

|                  |                        |                    |              |
|------------------|------------------------|--------------------|--------------|
| Sample name      | H11H                   | Vial position      | 47           |
| Sample file name | SER_wiff2 - HUE        | Inject volume      | 5.00         |
| Acquisition date | 21/05/2021 14:19:41 PM | Acquisition method | ESI_POS_SCAN |
| Operator         | CB21261708             | Instrument name    | X500r QTOF   |

## Full mass spectrum

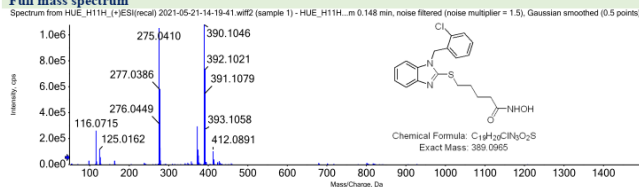

## Expanded spectrum

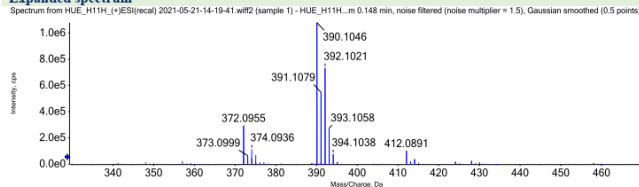

Figure S3.32 MS spectrum of compound 7

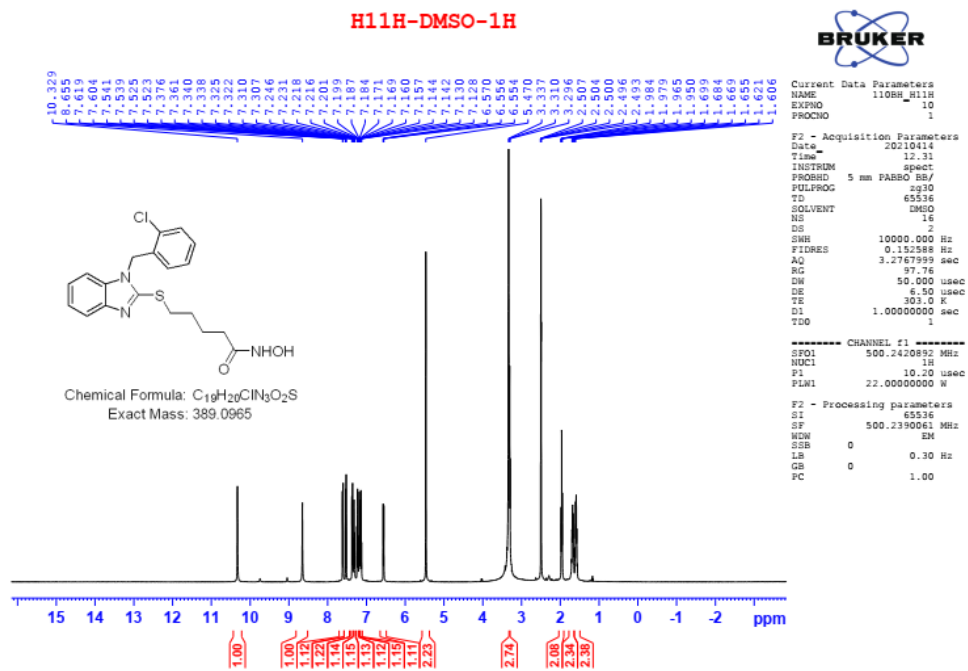

Figure S3.33 <sup>1</sup>H-NMR spectrum of compound 7

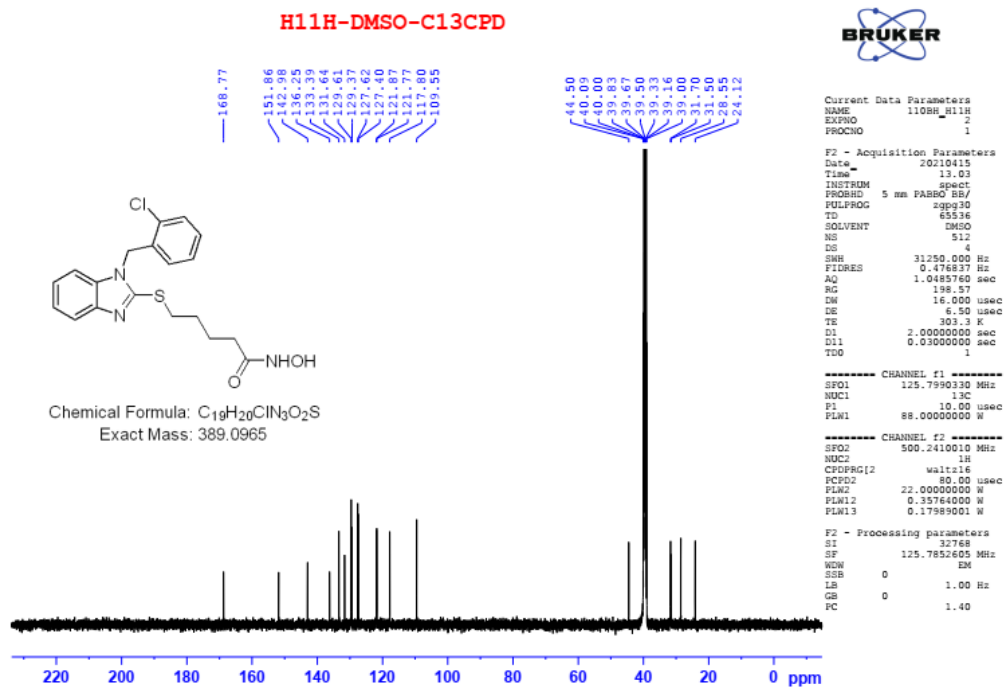

Figure S3.34 <sup>13</sup>C-NMR spectrum of compound 7



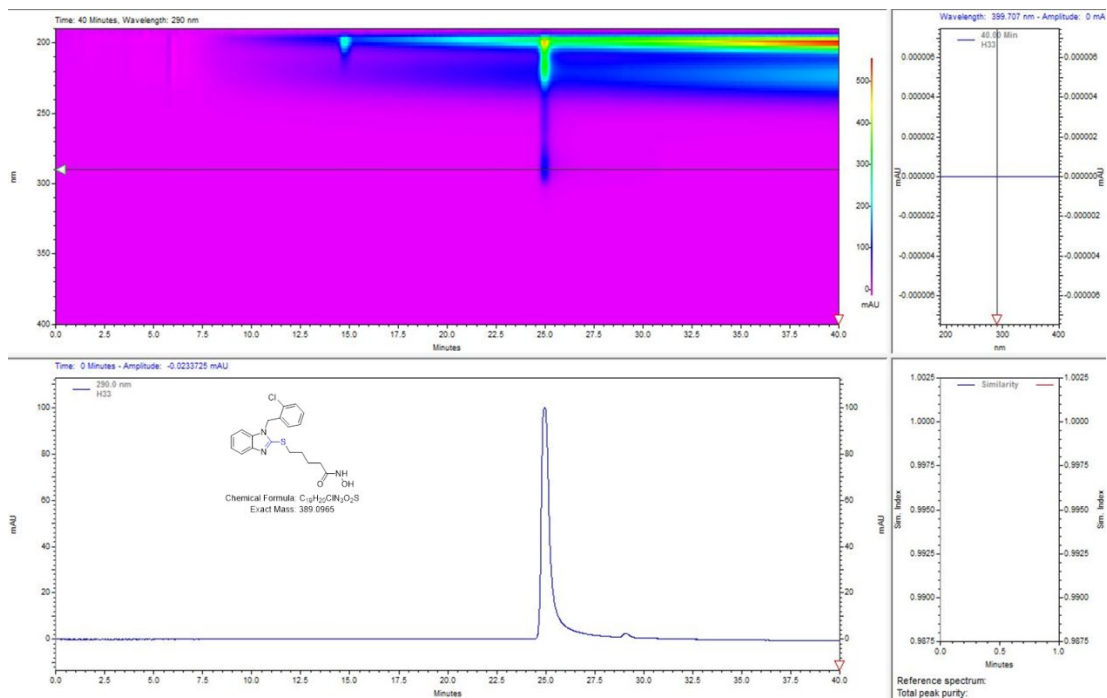

Figure S3.35 HPLC spectrum of compound 7

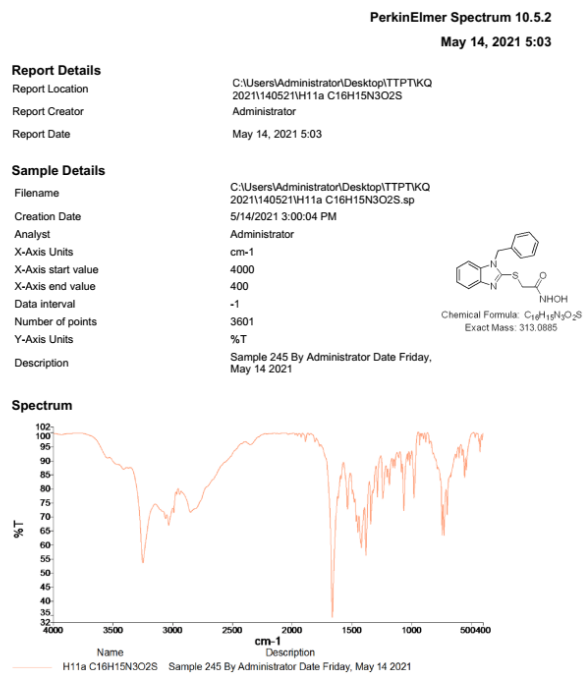

Figure S3.36 IR spectrum of compound 8

### ANALYSIS REPORT

**Injection details**

|                  |                        |                    |              |
|------------------|------------------------|--------------------|--------------|
| Sample name      | H11A                   | Vial position      | 40           |
| Sample file name | SER_wiff2 - HUE        | Inject volume      | 5.00         |
| Acquisition date | 21/05/2021 13:59:20 PM | Acquisition method | ESI_POS_SCAN |
| Operator         | CB21261708             | Instrument name    | X500R QTOF   |

**Full mass spectrum**

Spectrum from HUE\_H11A\_(+)ESI 2021-05-21-13-59-20.wiff2 (sample 2) - HUE\_H11A\_(+)ESI... 0.157 min, noise filtered (noise multiplier = 1.5), Gaussian smoothed (0.5 points)

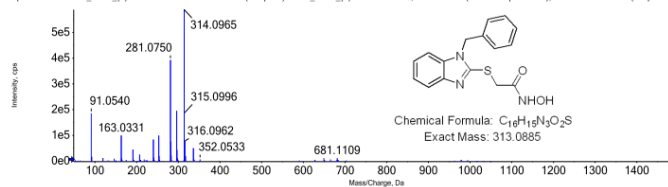
**Expanded spectrum**

Spectrum from HUE\_H11A\_(+)ESI 2021-05-21-13-59-20.wiff2 (sample 2) - HUE\_H11A\_(+)ESI... 0.157 min, noise filtered (noise multiplier = 1.5), Gaussian smoothed (0.5 points)

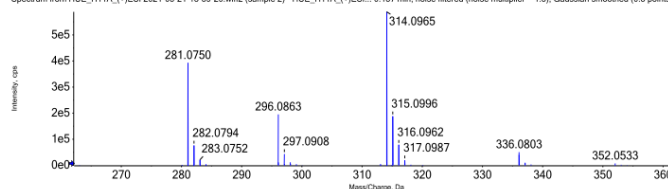

**Figure S3.37 MS spectrum of compound 8**

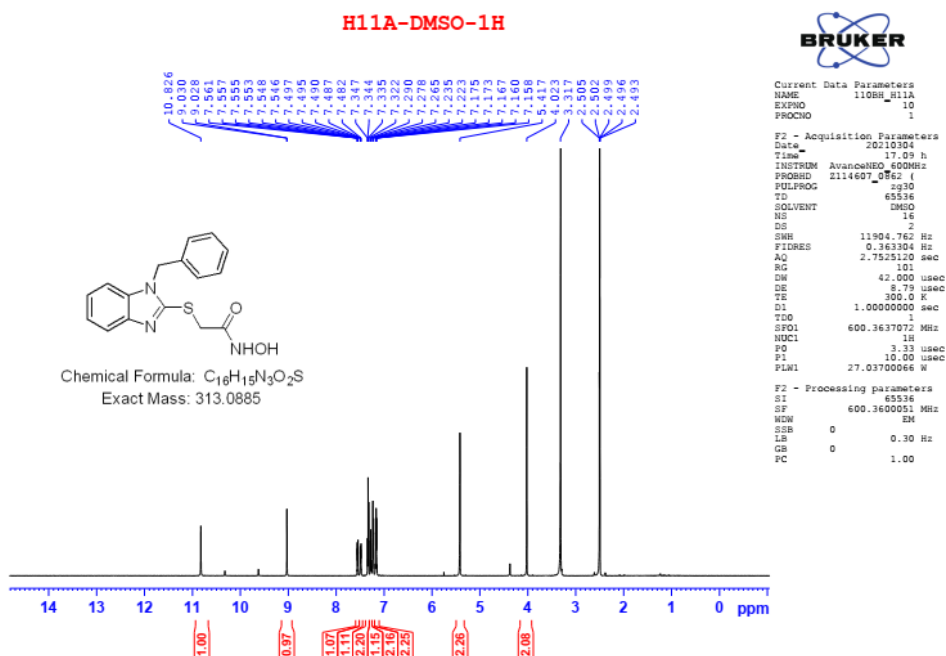

**Figure S3.38 <sup>1</sup>H-NMR spectrum of compound 8**

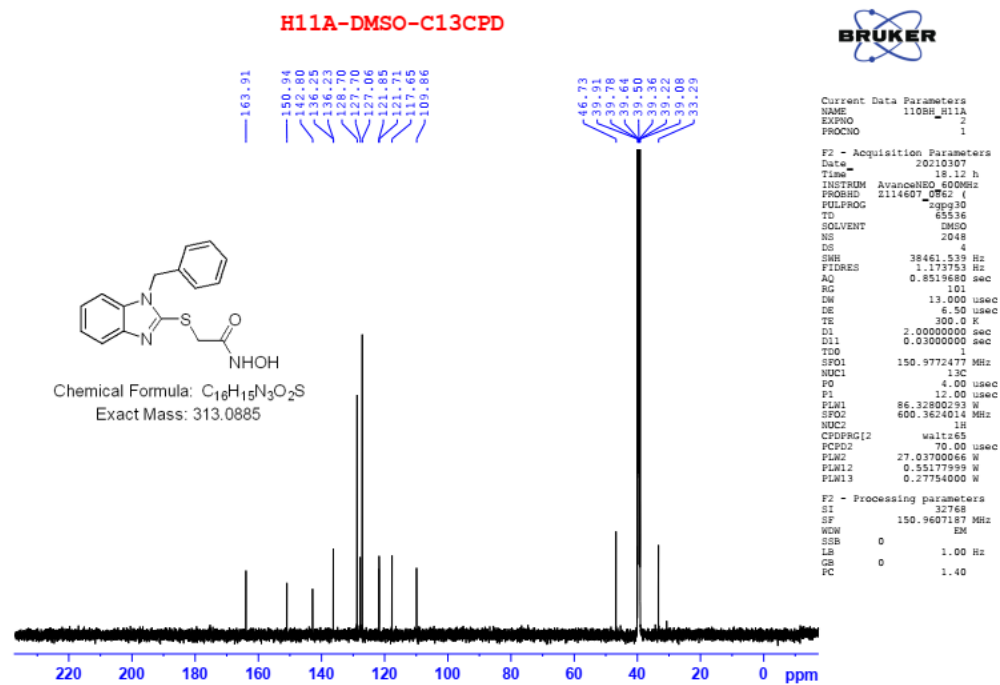

Figure S3.39  $^{13}C$ -NMR spectrum of compound 8

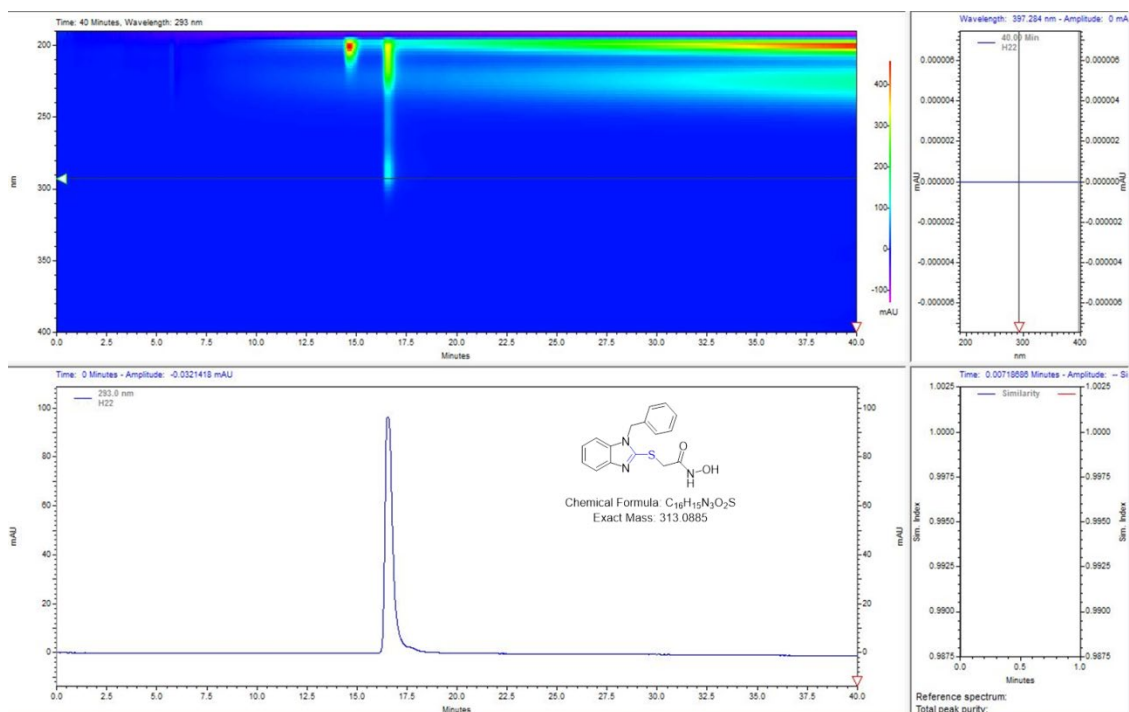

Figure S3.40 HPLC spectrum of compound 8

May 14, 2021 5:07

## Report Details

Report Location C:\Users\Administrator\Desktop\TTPTKQ  
2021\140521\H11c C17H14F3N3O2S  
Report Creator Administrator  
Report Date May 14, 2021 5:07

## Sample Details

Filename C:\Users\Administrator\Desktop\TTPTKQ  
2021\140521\H11c C17H14F3N3O2S.sp  
Creation Date 5/14/2021 1:06:44 PM  
Analyst Administrator  
X-Axis Units cm-1  
X-Axis start value 4000  
X-Axis end value 400  
Data interval -1  
Number of points 3601  
Y-Axis Units %T  
Description Sample 240 By Administrator Date Friday,  
May 14 2021

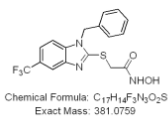

## Spectrum

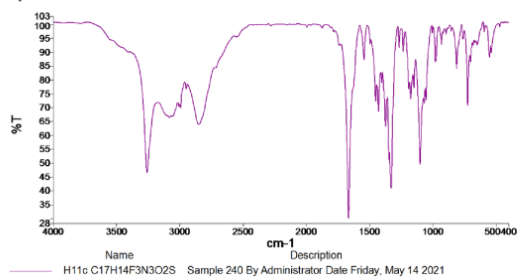

Figure S3.41 IR spectrum of compound 9

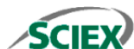

Created with SCIEX OS 1.2

**CENTER FOR RESEARCH AND TECHNOLOGY TRANSFER**  
**PHARMACEUTICAL CHEMISTRY LABORATORY**  
1B, Thanh Loc 29 St., Dist 12, Ho Chi Minh City, Vietnam. Phone: (84) 907 070 939

## ANALYSIS REPORT

## Injection details

|                  |                        |                    |              |
|------------------|------------------------|--------------------|--------------|
| Sample name      | H11C                   | Vial position      | 42           |
| Sample file name | SER_wiff2 - HUE        | Inject volume      | 5.00         |
| Acquisition date | 21/05/2021 14:03:34 PM | Acquisition method | ESI_POS_SCAN |
| Operator         | CB21261708             | Instrument name    | X500R_QTOF   |

## Full mass spectrum

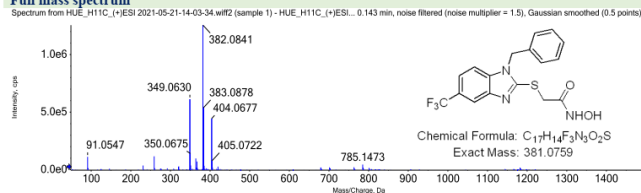

## Expanded spectrum

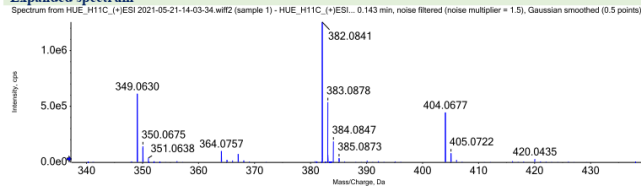

Figure S3.42 MS spectrum of compound 9

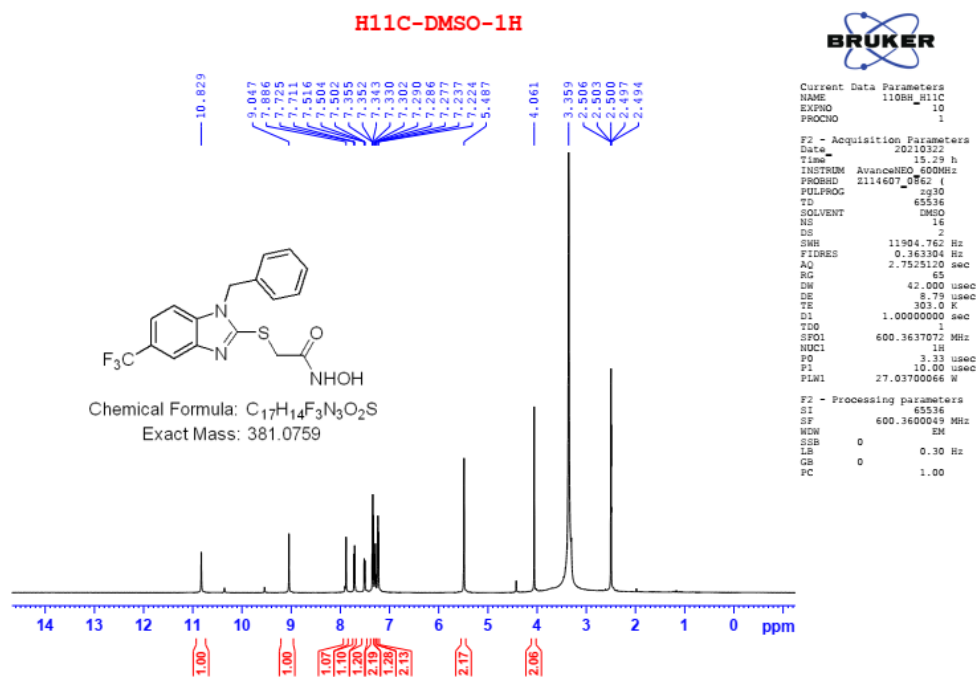

Figure S3.43  $^1\text{H}$ -NMR spectrum of compound 9

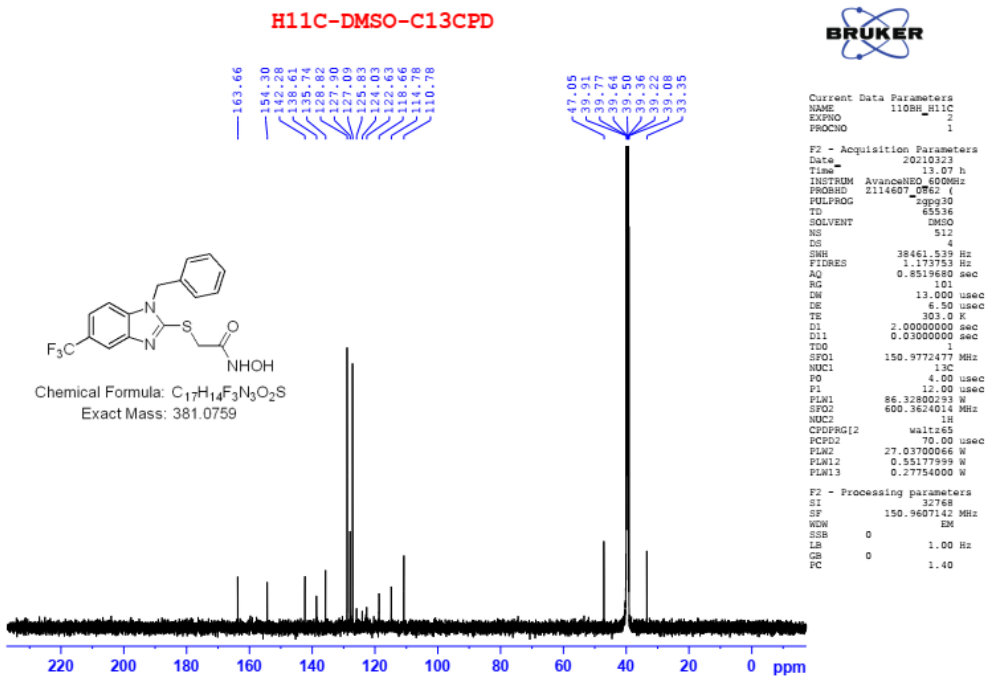

Figure S3.44  $^{13}\text{C}$ -NMR spectrum of compound 9

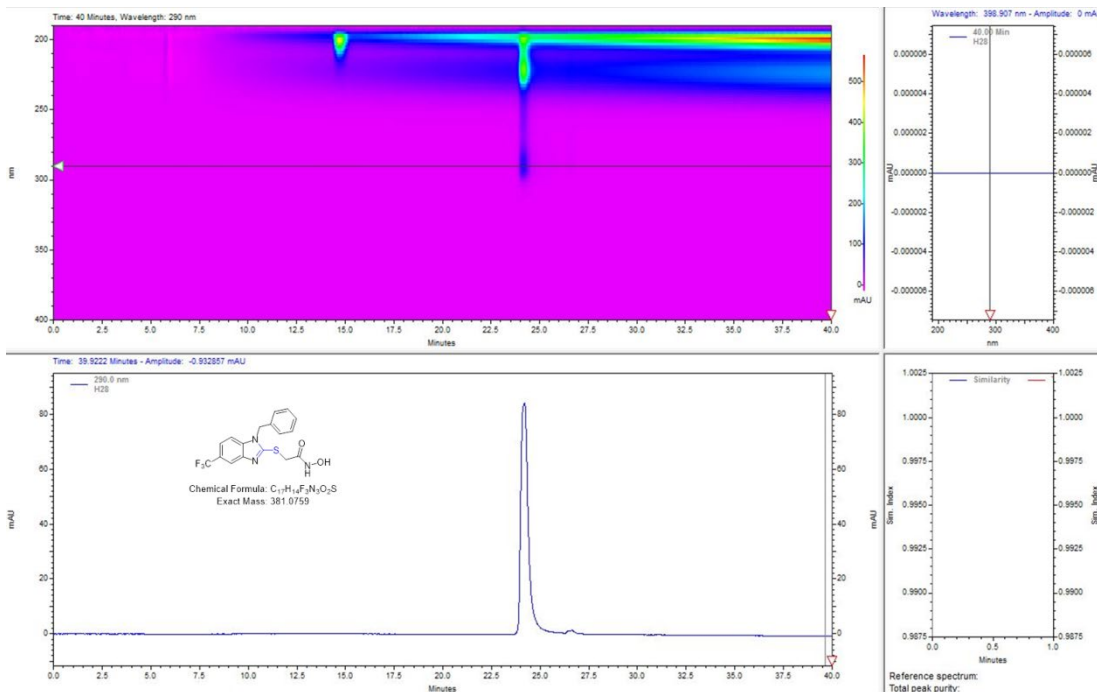

Figure S3.45 HPLC spectrum of compound 9

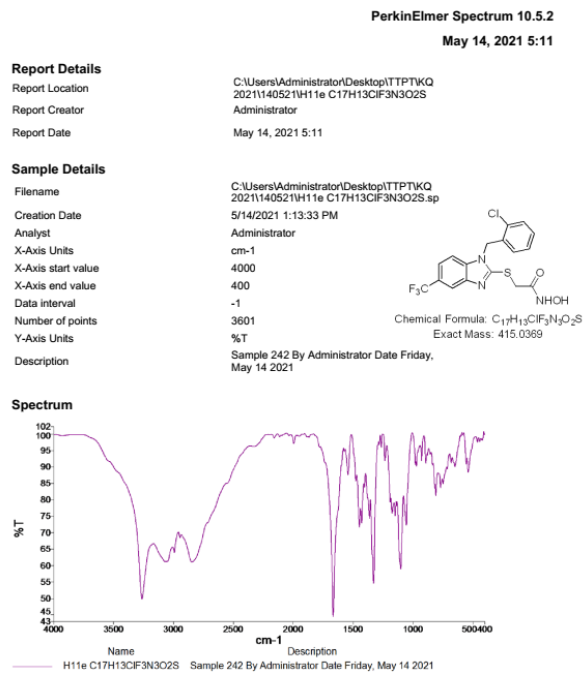

Figure S3.46 IR spectrum of compound 10

### ANALYSIS REPORT

**Injection details**

|                  |                        |                    |              |
|------------------|------------------------|--------------------|--------------|
| Sample name      | H11E                   | Vial position      | 44           |
| Sample file name | SER_wiff2 - HUE        | Inject volume      | 5.00         |
| Acquisition date | 21/05/2021 14:10:14 PM | Acquisition method | ESI_POS_SCAN |
| Operator         | CB21261708             | Instrument name    | X500s QTOF   |

**Full mass spectrum**
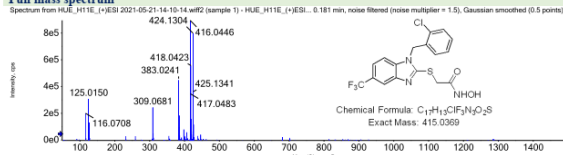
**Expanded spectrum**
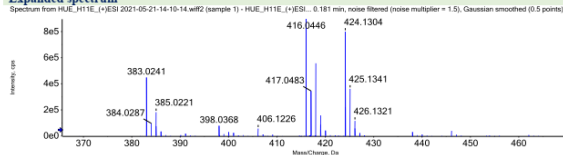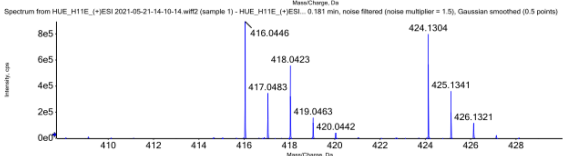

**Figure S3.47 MS spectrum of compound 10**

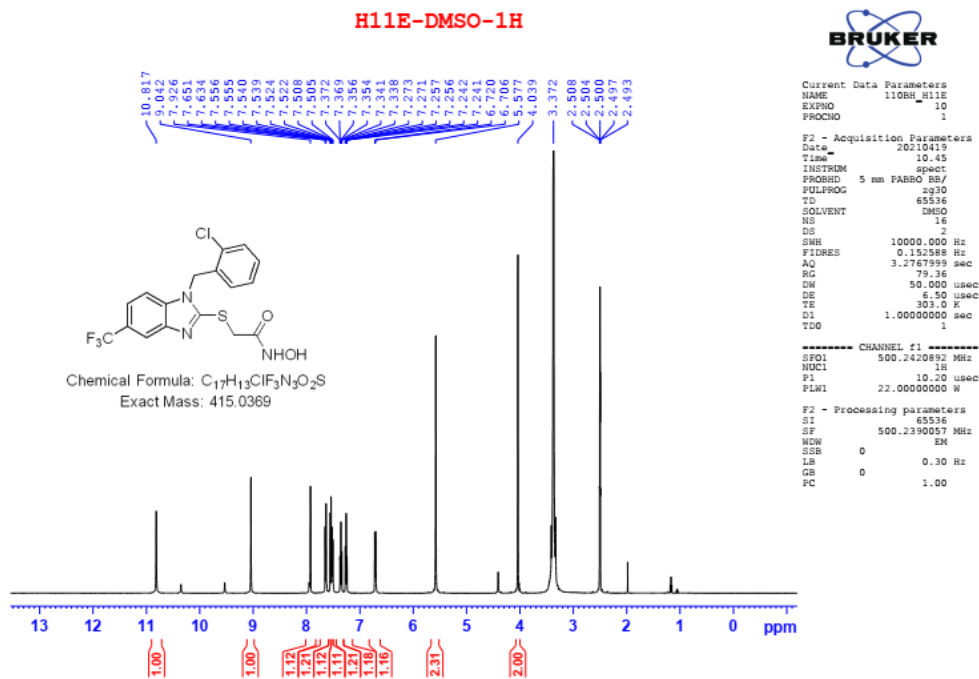

**Figure S3.48 <sup>1</sup>H-NMR spectrum of compound 10**

H11E-DMSO-C13CPD

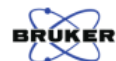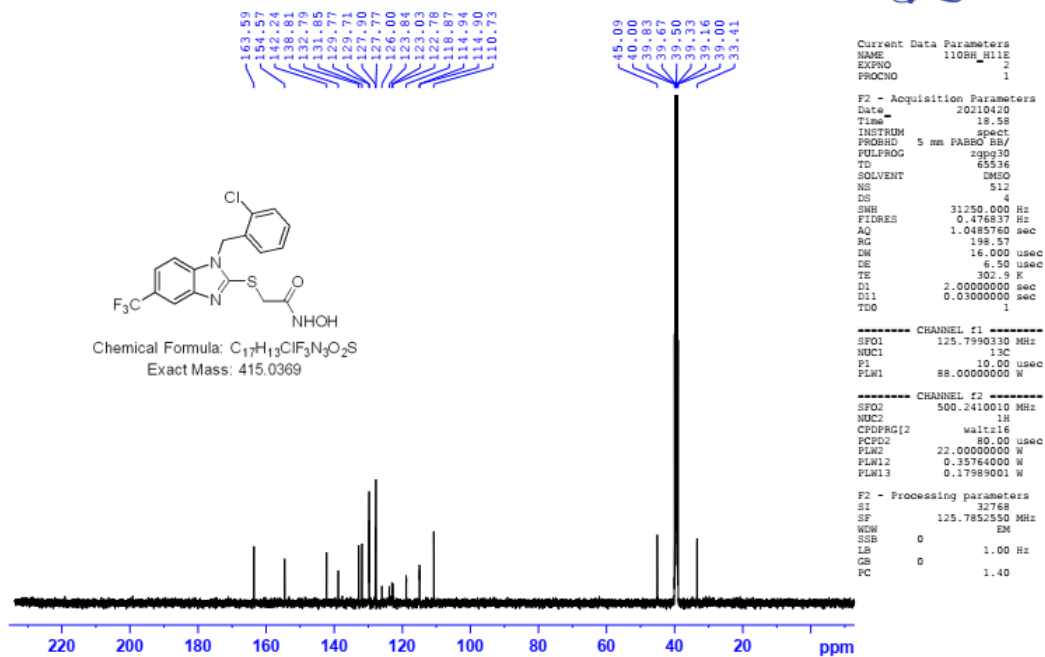

Figure S3.49 <sup>13</sup>C-NMR spectrum of compound 10

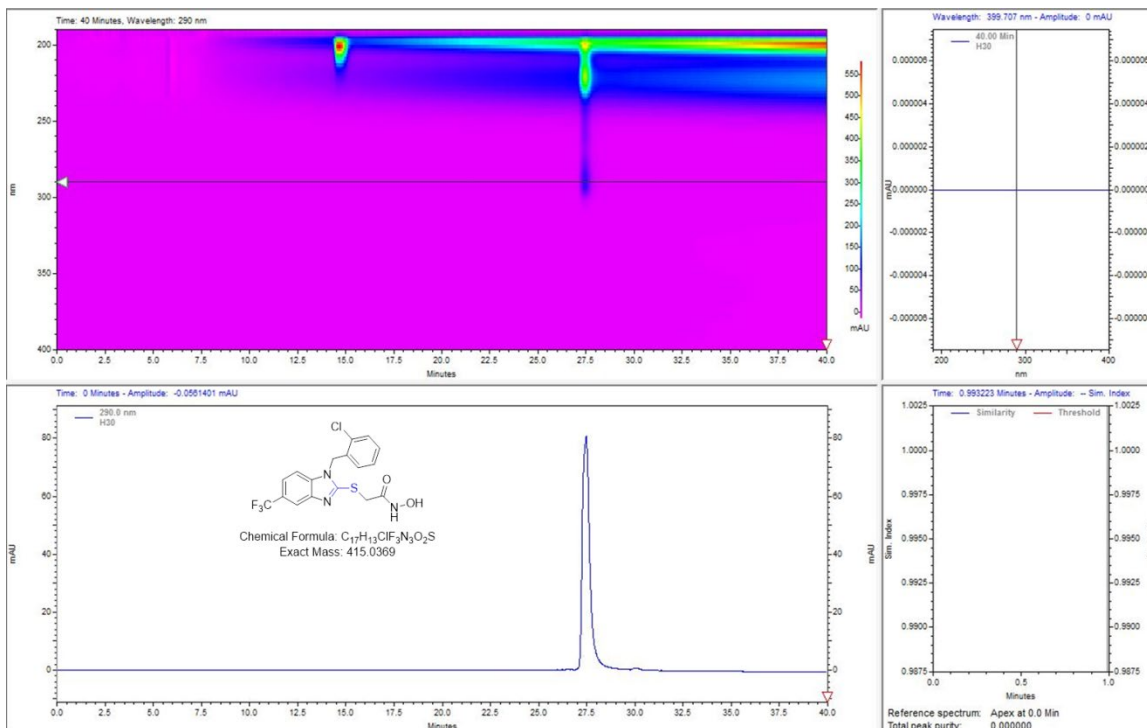

Figure S3.50 HPLC spectrum of compound 10



May 14, 2021 5:17

## Report Details

Report Location C:\Users\Administrator\Desktop\TTPTVKQ  
 2021\140521\H11g C16H14ClN3O2S  
 Report Creator Administrator  
 Report Date May 14, 2021 5:17

## Sample Details

Filename C:\Users\Administrator\Desktop\TTPTVKQ  
 2021\140521\H11g C16H14ClN3O2S.sp  
 Creation Date 5/14/2021 3:15:17 PM  
 Analyst Administrator  
 X-Axis Units cm-1  
 X-Axis start value 4000  
 X-Axis end value 400  
 Data interval -1  
 Number of points 3601  
 Y-Axis Units %T  
 Description Sample 248 By Administrator Date Friday,  
 May 14 2021

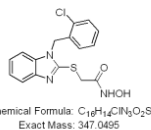

## Spectrum

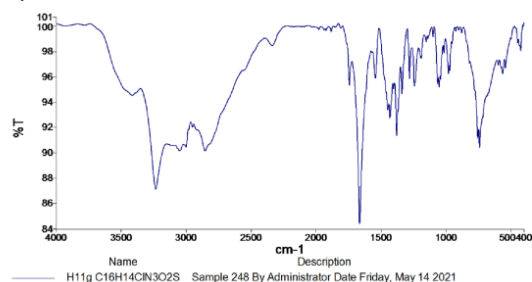

Figure S3.51 IR spectrum of compound 11

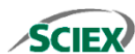

Created with SCIEX OS 1.2

CENTER FOR RESEARCH AND TECHNOLOGY TRANSFER  
 PHARMACEUTICAL CHEMISTRY LABORATORY  
 1B, Thanh Loc 29 St., Dist 12, Ho Chi Minh City, Vietnam. Phone: (84) 907 070 939

## ANALYSIS REPORT

## Injection details

|                  |                        |                    |              |
|------------------|------------------------|--------------------|--------------|
| Sample name      | H11G                   | Vial position      | 46           |
| Sample file name | SER_wiff2 - HUE        | Inject volume      | 5.00         |
| Acquisition date | 21/05/2021 14:18:04 PM | Acquisition method | ESI_POS_SCAN |
| Operator         | CB21261708             | Instrument name    | X500R QTOF   |

## Full mass spectrum

Spectrum from HUE\_H11G\_(+ESI) 2021-05-21-14-18-04 wiff2 (sample 1) - HUE\_H11G\_(+ESI)... 0.129 min, noise filtered (noise multiplier = 1.5), Gaussian smoothed (0.5 points)

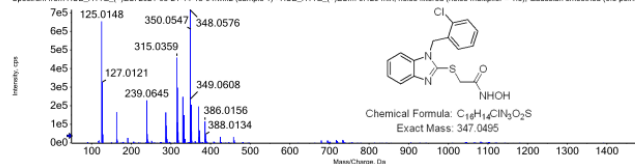

## Expanded spectrum

Spectrum from HUE\_H11G\_(+ESI) 2021-05-21-14-18-04 wiff2 (sample 1) - HUE\_H11G\_(+ESI)... 0.129 min, noise filtered (noise multiplier = 1.5), Gaussian smoothed (0.5 points)

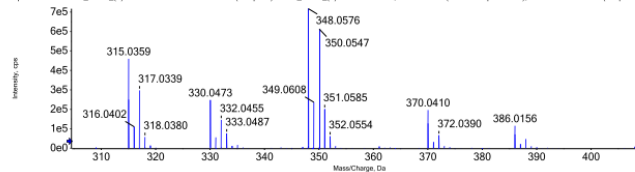

Figure S3.52 MS spectrum of compound 11

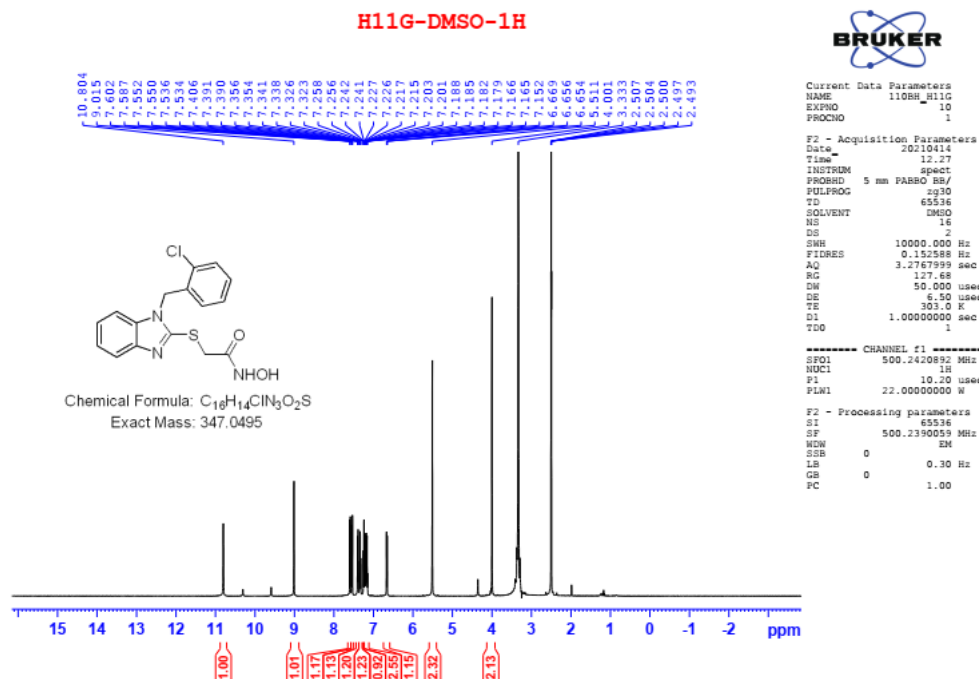

Figure S3.53 <sup>1</sup>H-NMR spectrum of compound 11

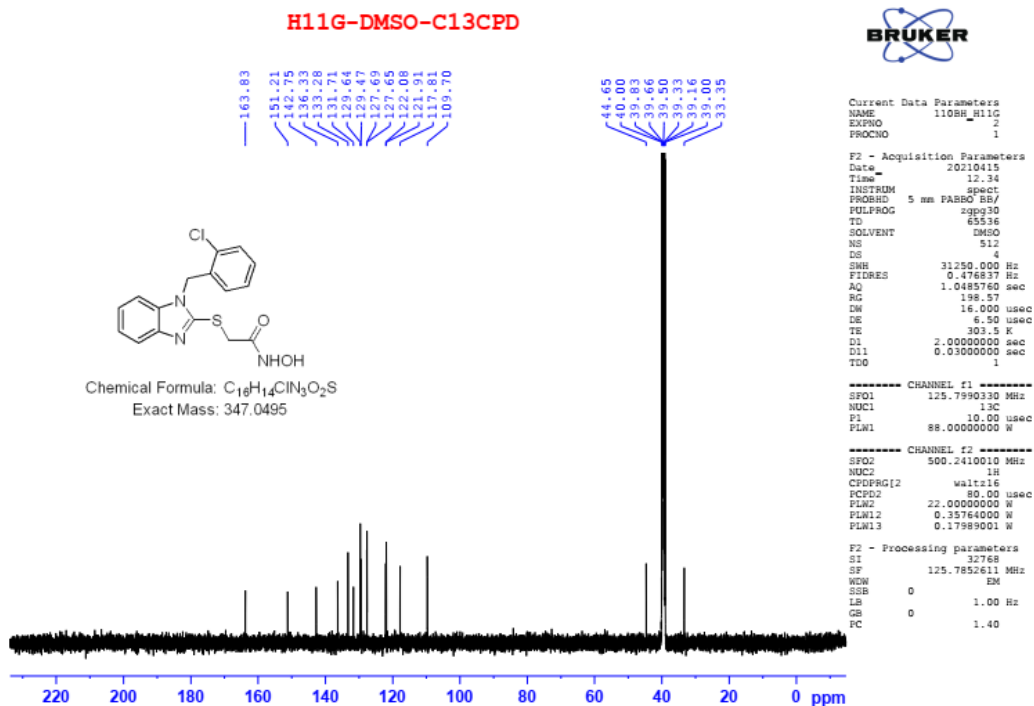

Figure S3.54 <sup>13</sup>C-NMR spectrum of compound 11

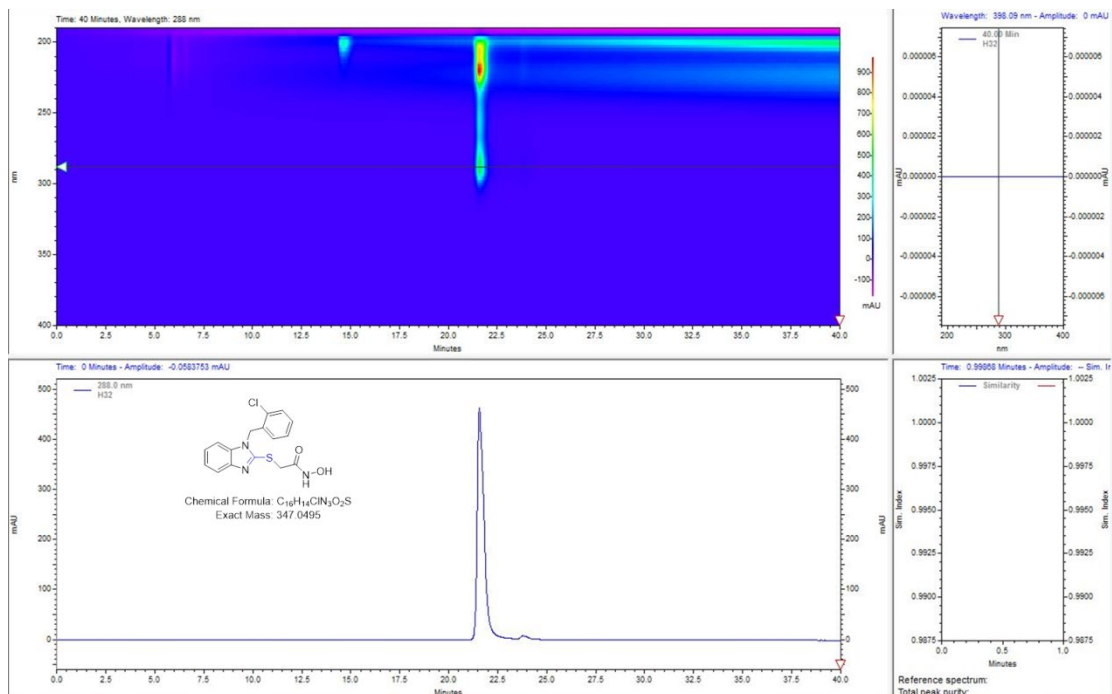

Figure S3.55 HPLC spectrum of compound 11

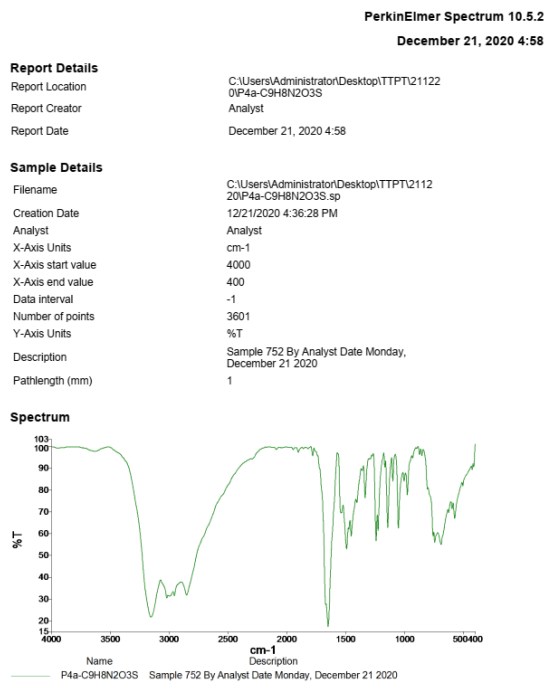

Figure S3.56 IR spectrum of compound 12

### ANALYSIS REPORT

| Injection details |                        |                    |              |
|-------------------|------------------------|--------------------|--------------|
| Sample name       | P4a                    | Vial position      | 33           |
| Sample file name  | SER_wif2 - HUE         | Inject volume      | 5.00         |
| Acquisition date  | 13/11/2020 03:40:19 PM | Acquisition method | ESI_POS_SCAN |
| Operator          | CB21261708             | Instrument name    | X500r_QTOF   |

#### Full mass spectrum

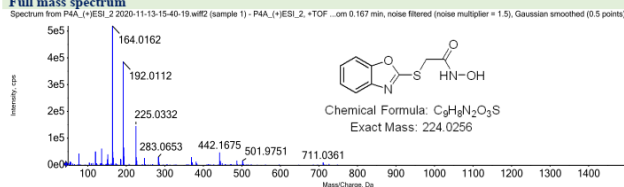

#### Expanded spectrum

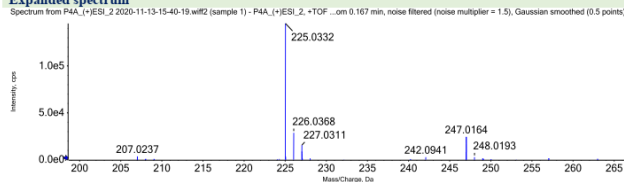

#### Molecular formula prediction

**Figure S3.57 MS spectrum of compound 12**

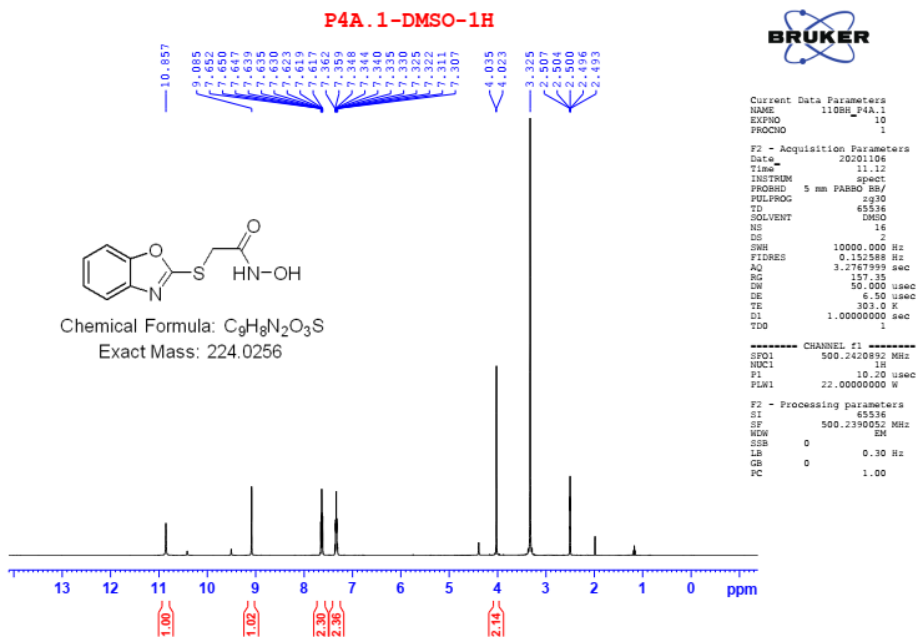

**Figure S3.58 <sup>1</sup>H-NMR spectrum of compound 12**

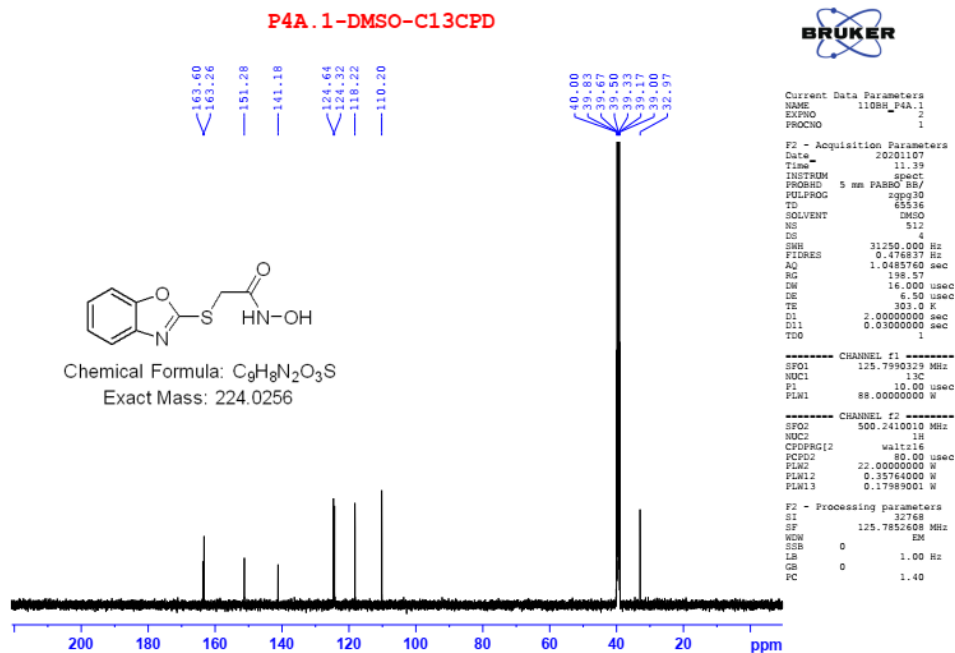

Figure S3.59 <sup>13</sup>C-NMR spectrum of compound 12

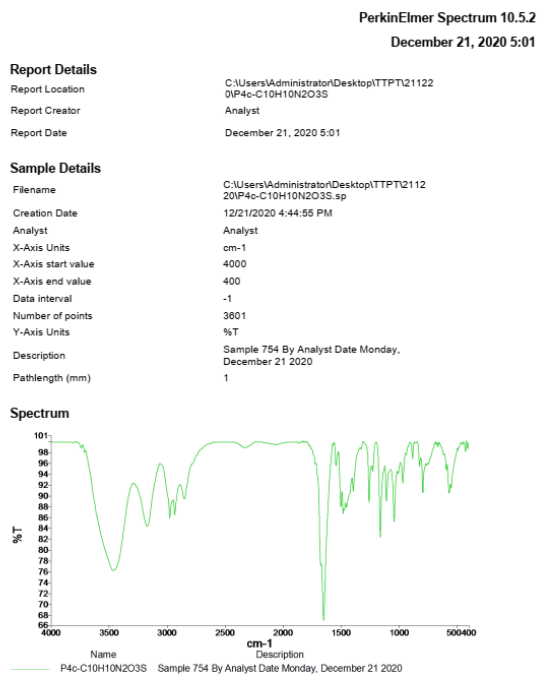

Figure S3.60 IR spectrum of compound 13

### ANALYSIS REPORT

**Injection details**

|                  |                        |                    |              |
|------------------|------------------------|--------------------|--------------|
| Sample name      | P4C                    | Vial position      | 33           |
| Sample file name | SER_wiE2 - HUE         | Inject volume      | 5.00         |
| Acquisition date | 29/12/2020 03:43:29 PM | Acquisition method | ESI_POS_SCAN |
| Operator         | CB21261708             | Instrument name    | X500r QTOF   |

**Full mass spectrum**
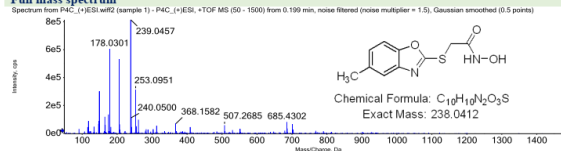
**Expanded spectrum**
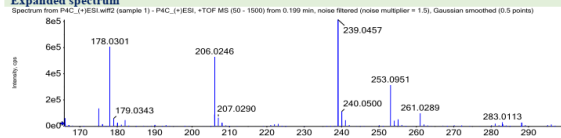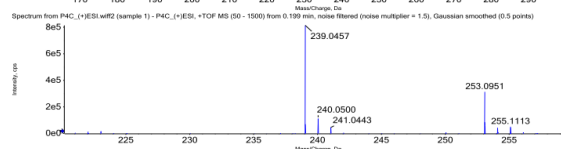
**Molecular formula prediction**

**Figure S3.61 MS spectrum of compound 13**

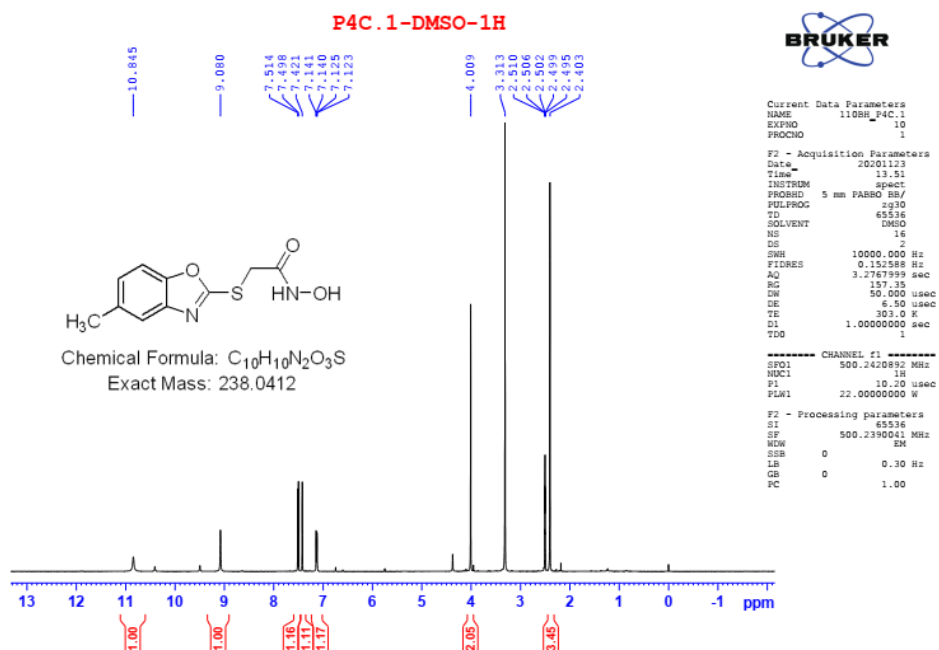

**Figure S3.62 <sup>1</sup>H-NMR spectrum of compound 13**

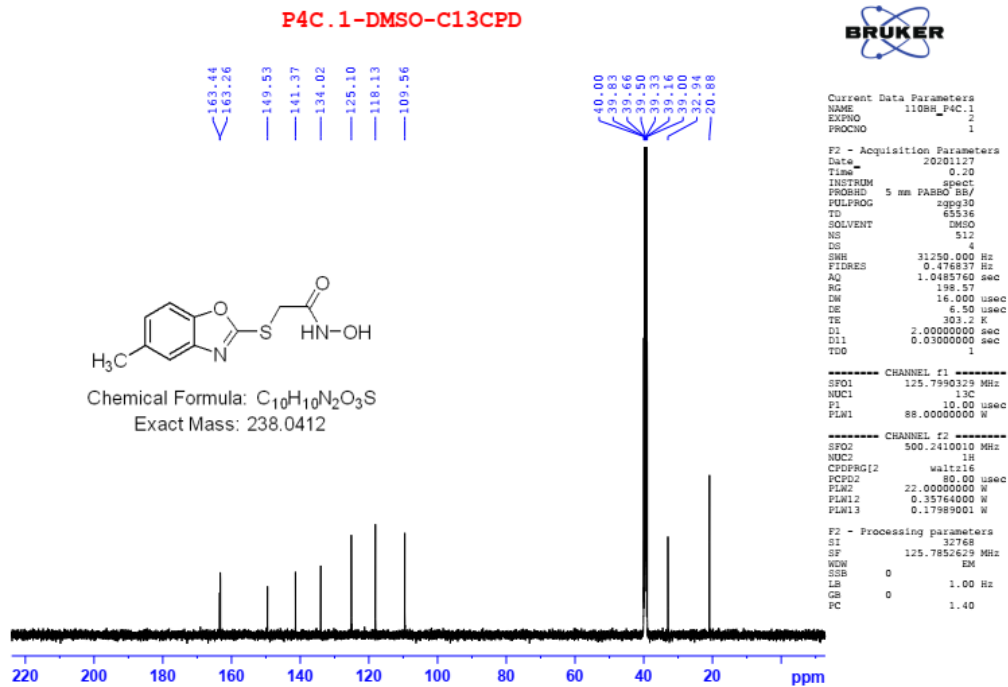

**Figure S3.63** <sup>13</sup>C-NMR spectrum of compound 13

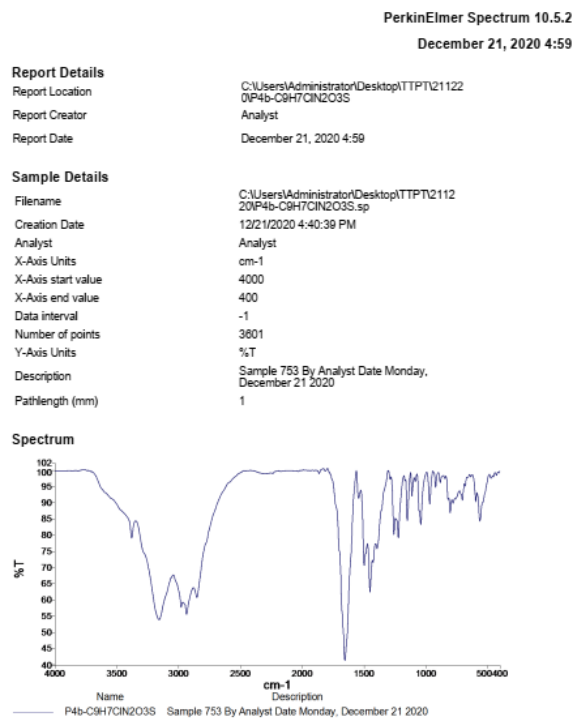

**Figure S3.64** IR spectrum of compound 14

### ANALYSIS REPORT

| Injection details |                        |                    |              |
|-------------------|------------------------|--------------------|--------------|
| Sample name       | P4b                    | Vial position      | 33           |
| Sample file name  | SER_wiff2 - HUE        | Inject volume      | 5.00         |
| Acquisition date  | 13/11/2020 03:37:10 PM | Acquisition method | ESI_POS_SCAN |
| Operator          | CB21261708             | Instrument name    | X500r QTOF   |

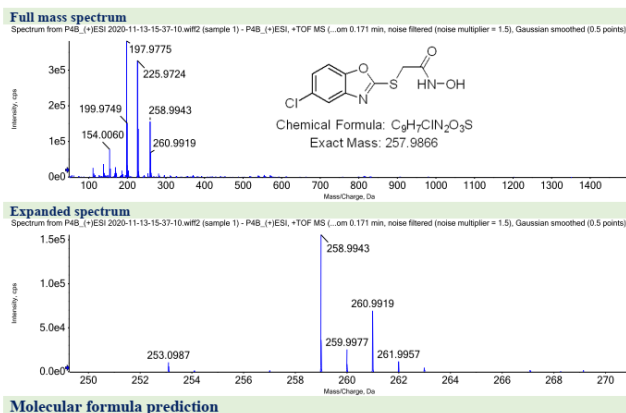

**Figure S3.65 MS spectrum of compound 14**

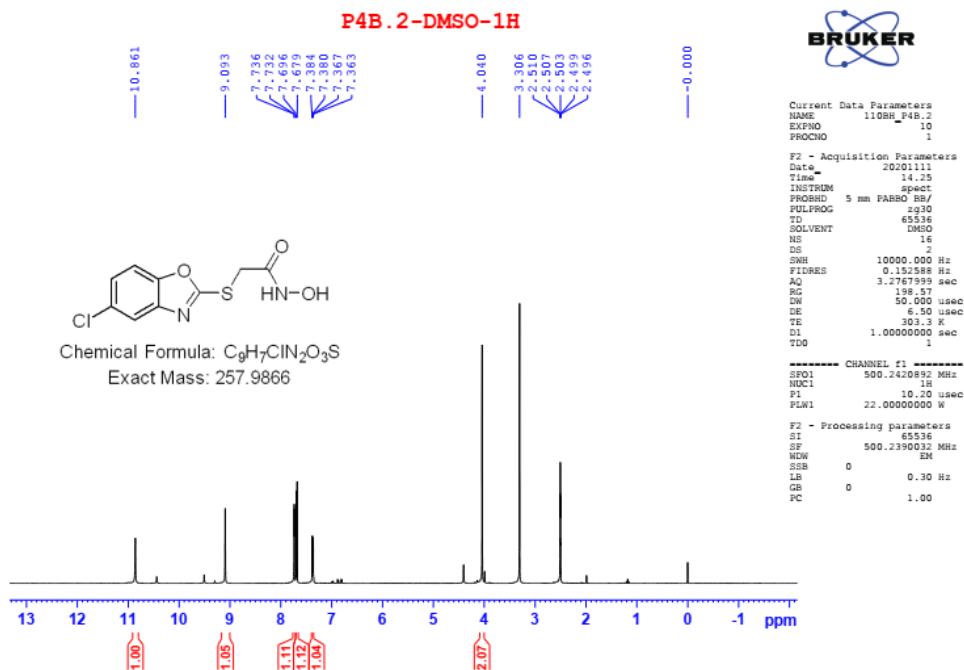

**Figure S3.66 <sup>1</sup>H-NMR spectrum of compound 14**



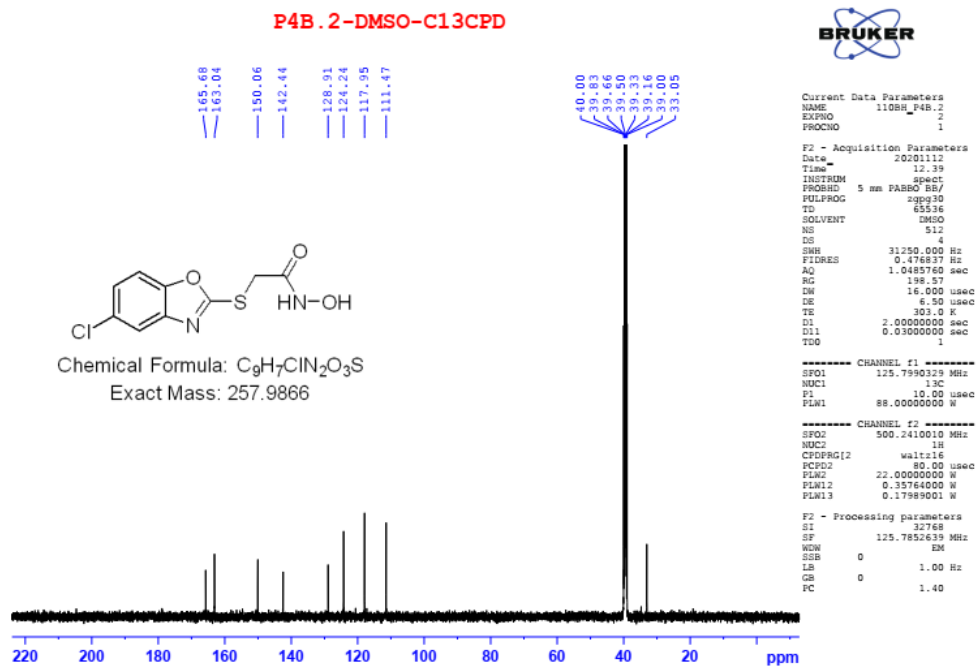

**Figure S3.67** <sup>13</sup>C-NMR spectrum of compound 14

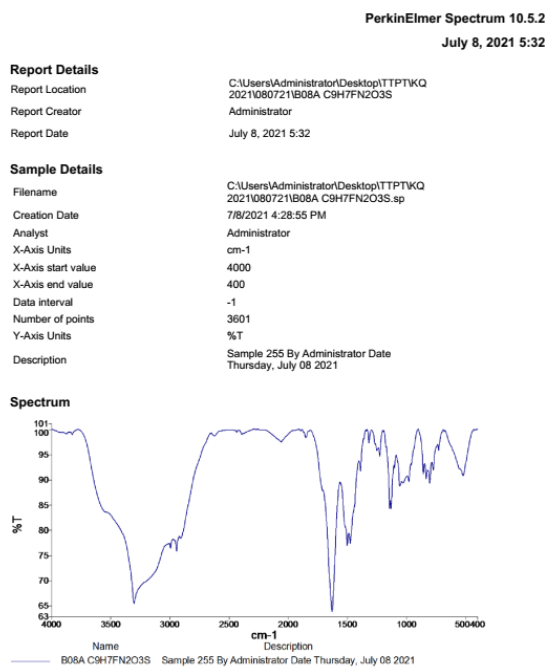

**Figure S3.68** IR spectrum of compound 15

### ANALYSIS REPORT

| Injection details |                        |                    |              |
|-------------------|------------------------|--------------------|--------------|
| Sample name       | BO8A                   | Vial position      | 25           |
| Sample file name  | SER_wiff2 - HUE        | Inject volume      | 5.00         |
| Acquisition date  | 01/02/2021 05:18:17 PM | Acquisition method | ESI_POS_SCAN |
| Operator          | CB21261708             | Instrument name    | X500r_QTOF   |

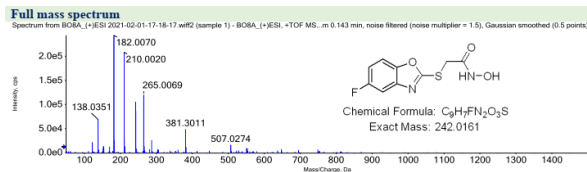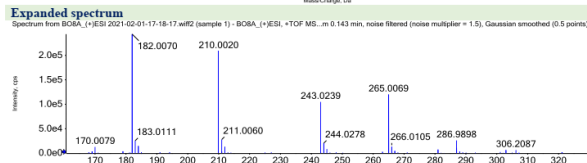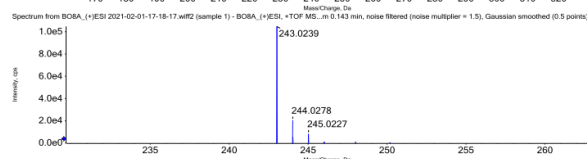

**Figure S3.69 MS spectrum of compound 15**

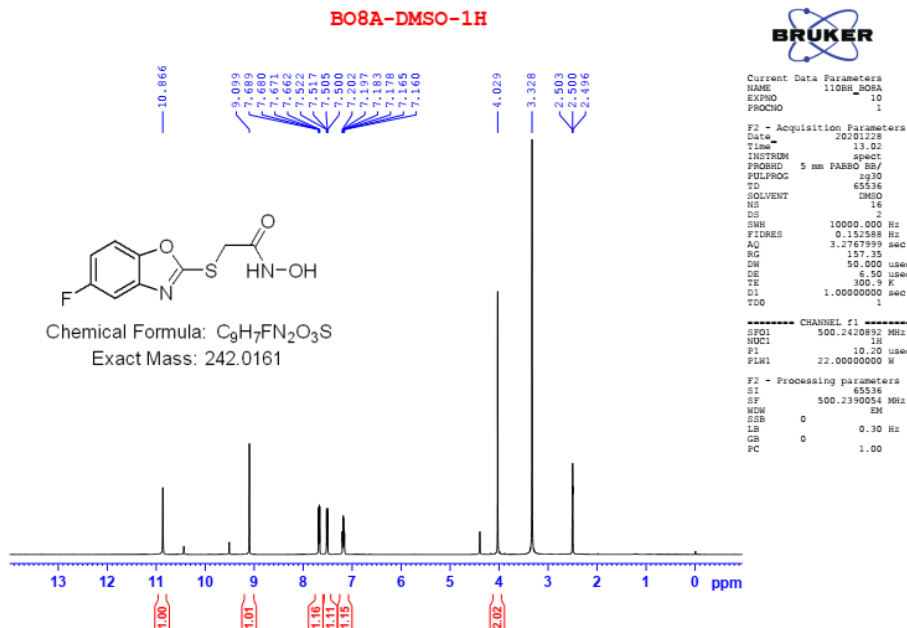

**Figure S3.70 <sup>1</sup>H-NMR spectrum of compound 15**

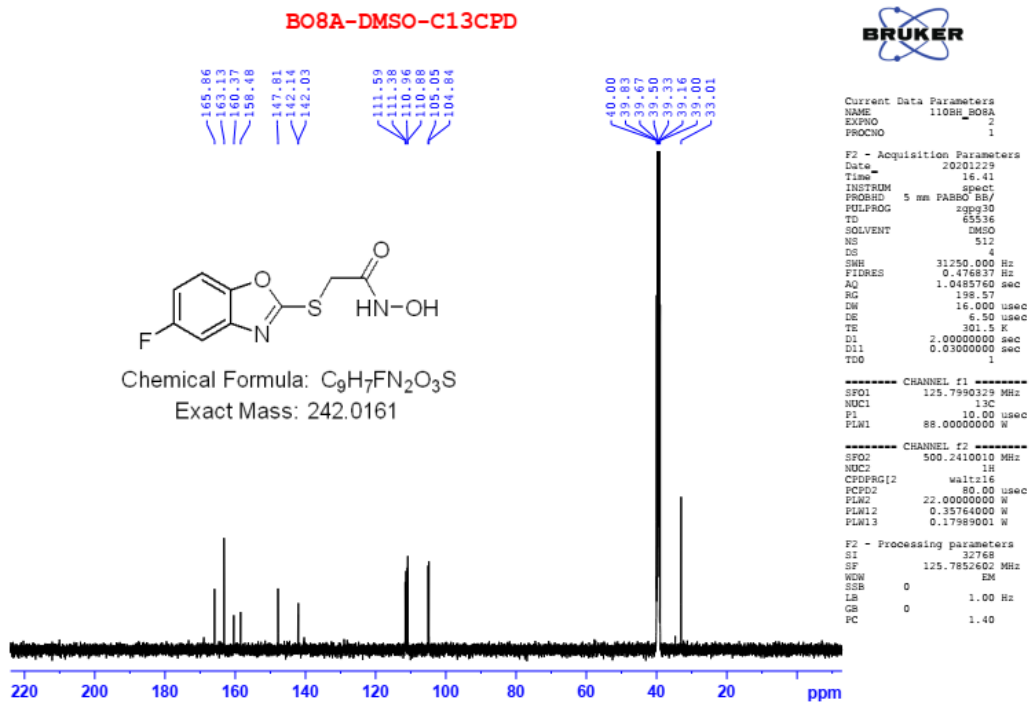

Figure S3.71  $^{13}C$ -NMR spectrum of compound 15

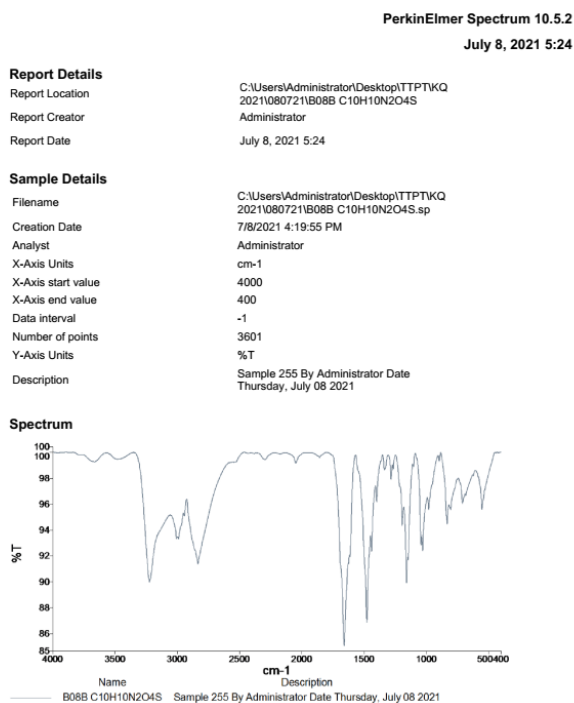

Figure S3.72 IR spectrum of compound 16

### ANALYSIS REPORT

| Injection details |                        |                    |              |
|-------------------|------------------------|--------------------|--------------|
| Sample name       | BO8B                   | Vial position      | 33           |
| Sample file name  | SER_wiff2 - HUE        | Inject volume      | 5.00         |
| Acquisition date  | 09/06/2021 17:30:42 PM | Acquisition method | ESI_POS_SCAN |
| Operator          | CB21261708             | Instrument name    | X500R QTOF   |

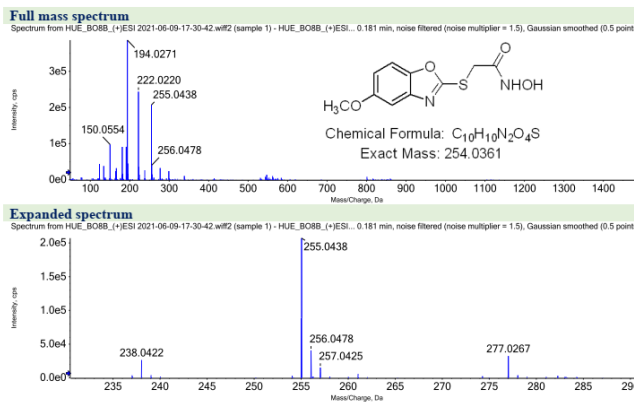

**Figure S3.73 MS spectrum of compound 16**

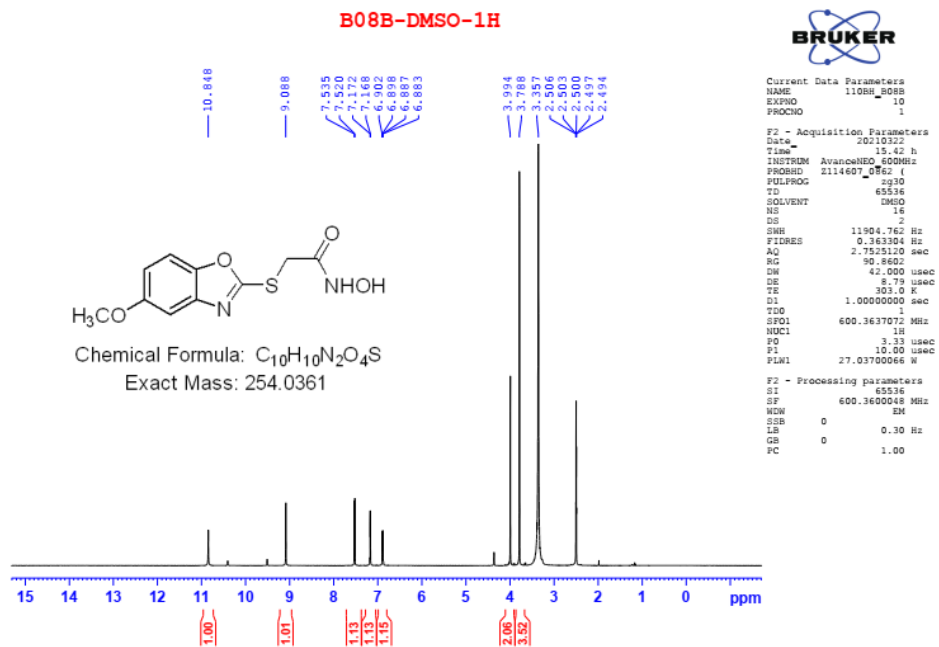

**Figure S3.74 <sup>1</sup>H-NMR spectrum of compound 16**

B08B-DMSO-C13CPD

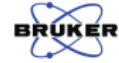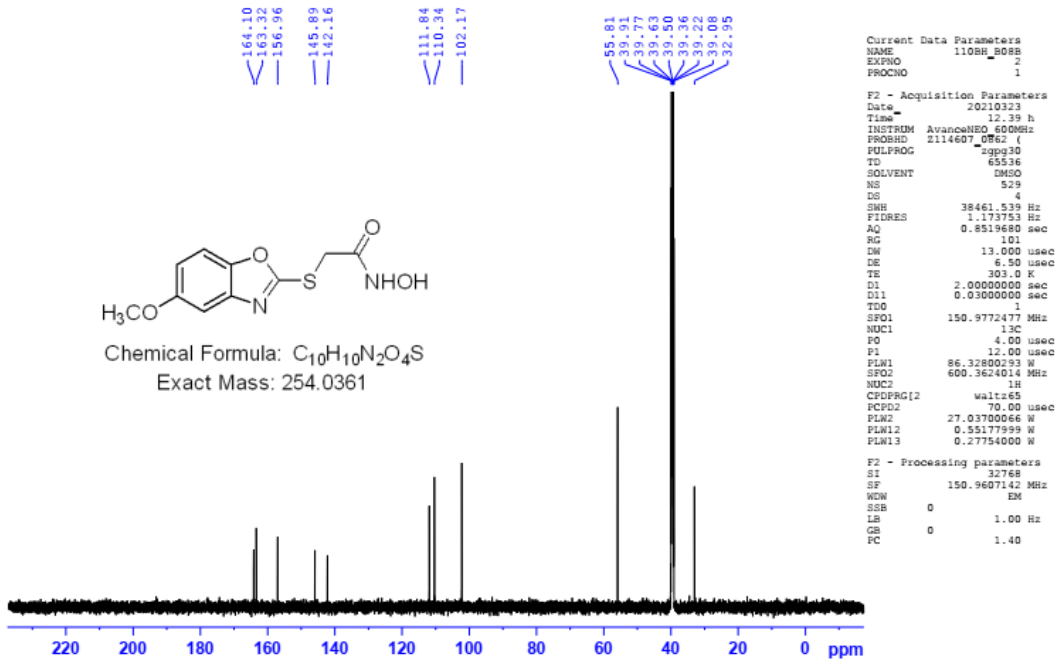

Figure S3.75 <sup>13</sup>C-NMR spectrum of compound 16

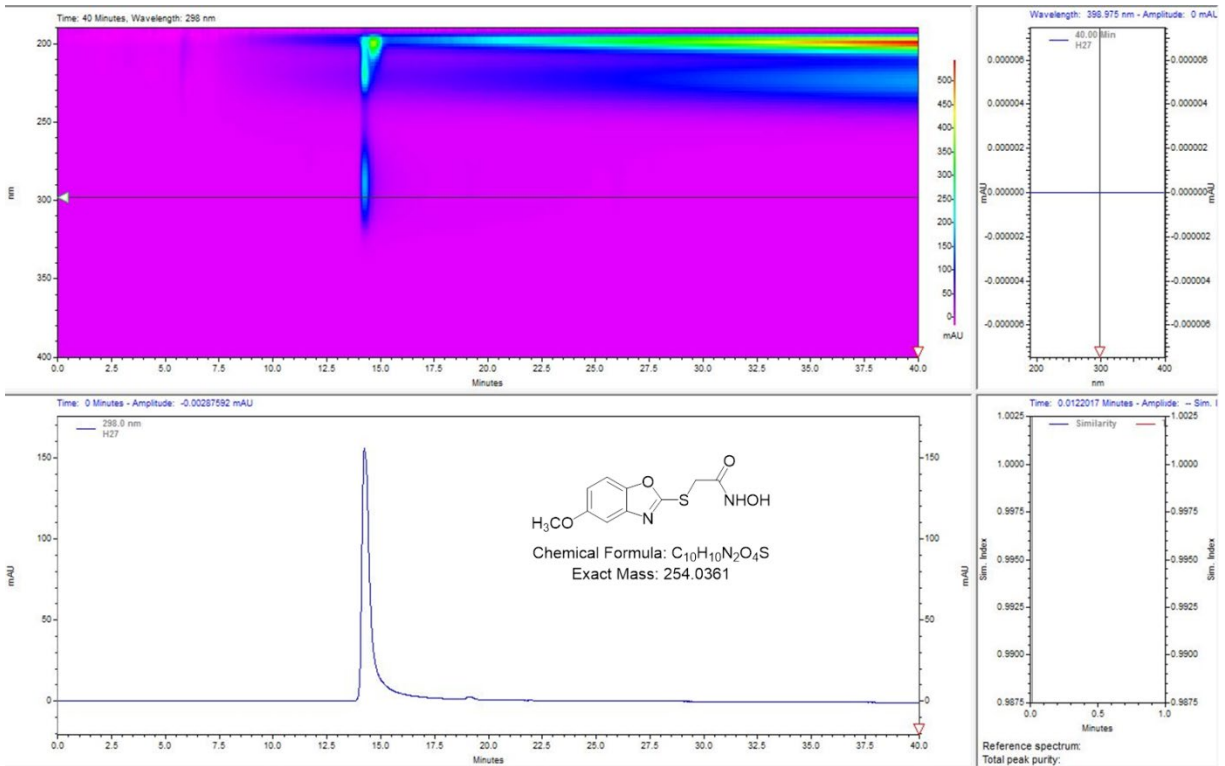

Figure S3.76 HPLC spectrum of compound 16

July 8, 2021 5:14

## Report Details

Report Location C:\Users\Administrator\Desktop\TTPTWKQ  
 2021\080721\B07A C12H14N2O3S  
 Report Creator Administrator  
 Report Date July 8, 2021 5:14

## Sample Details

Filename C:\Users\Administrator\Desktop\TTPTWKQ  
 2021\080721\B07A C12H14N2O3S.sp  
 Creation Date 7/8/2021 4:11:39 PM  
 Analyst Administrator  
 X-Axis Units cm-1  
 X-Axis start value 4000  
 X-Axis end value 400  
 Data interval -1  
 Number of points 3601  
 Y-Axis Units %T  
 Description Sample 261 By Administrator Date  
 Thursday, July 08 2021

## Spectrum

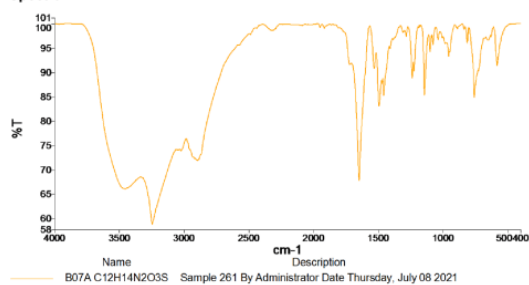

Figure S3.77 IR spectrum of compound 17

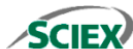

Created with SCIEX OS 1.2

CENTER FOR RESEARCH AND TECHNOLOGY TRANSFER  
 PHARMACEUTICAL CHEMISTRY LABORATORY  
 01, Mac Dinh Chi St., Dist 1, Ho Chi Minh City, Vietnam. Phone: (84) 907 070 939

## ANALYSIS REPORT

## Injection details

|                  |                        |                    |              |
|------------------|------------------------|--------------------|--------------|
| Sample name      | B07a                   | Vial position      | 32           |
| Sample file name | SER_wiff2 - HUE        | Inject volume      | 5.00         |
| Acquisition date | 13/11/2020 03:34:27 PM | Acquisition method | ESI_POS_SCAN |
| Operator         | CB21261708             | Instrument name    | X500R QTOF   |

## Full mass spectrum

Spectrum from B07a\_ (+)ESI 2020-11-13-15-34-27.wiff2 (sample 1) - B07a\_ (+)ESI\_+TOF MS...m 0.171 min, noise filtered (noise multiplier = 1.5), Gaussian smoothed (0.5 points)

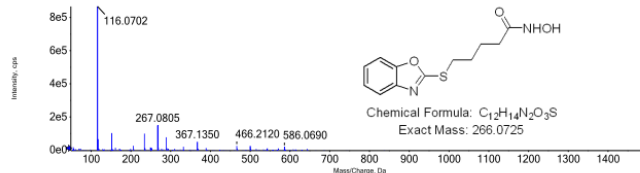

## Expanded spectrum

Spectrum from B07a\_ (+)ESI 2020-11-13-15-34-27.wiff2 (sample 1) - B07a\_ (+)ESI\_+TOF MS...m 0.171 min, noise filtered (noise multiplier = 1.5), Gaussian smoothed (0.5 points)

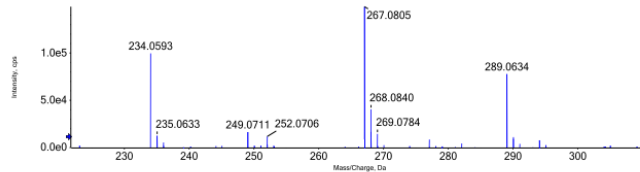

## Molecular formula prediction

Figure S3.78 MS spectrum of compound 17

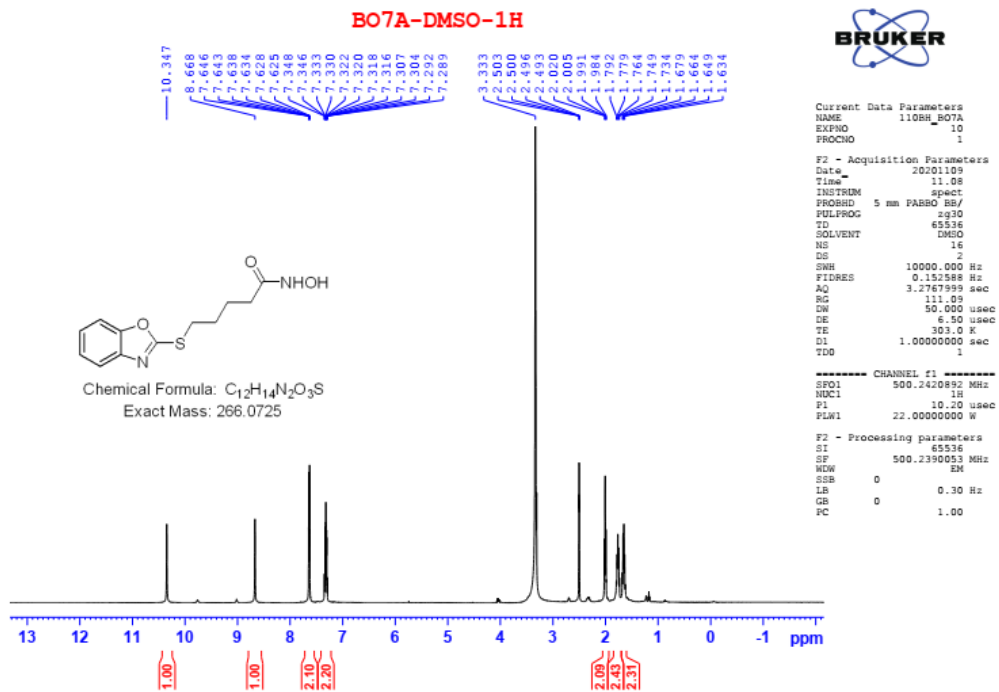

Figure S3.79  $^1\text{H}$ -NMR spectrum of compound 17

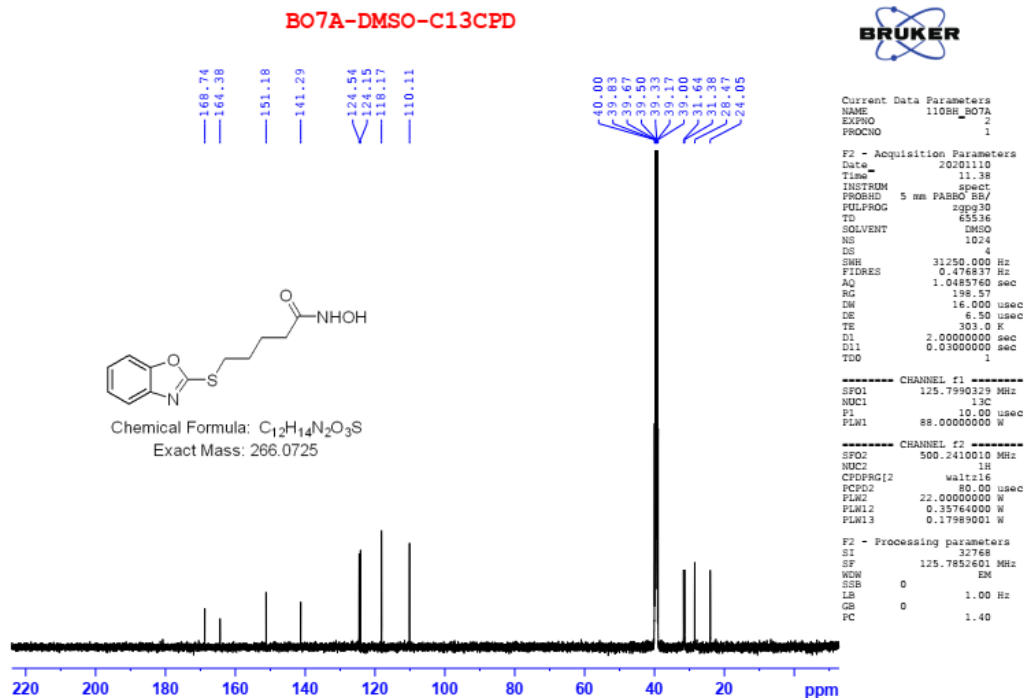

Figure S3.80  $^{13}\text{C}$ -NMR spectrum of compound 17

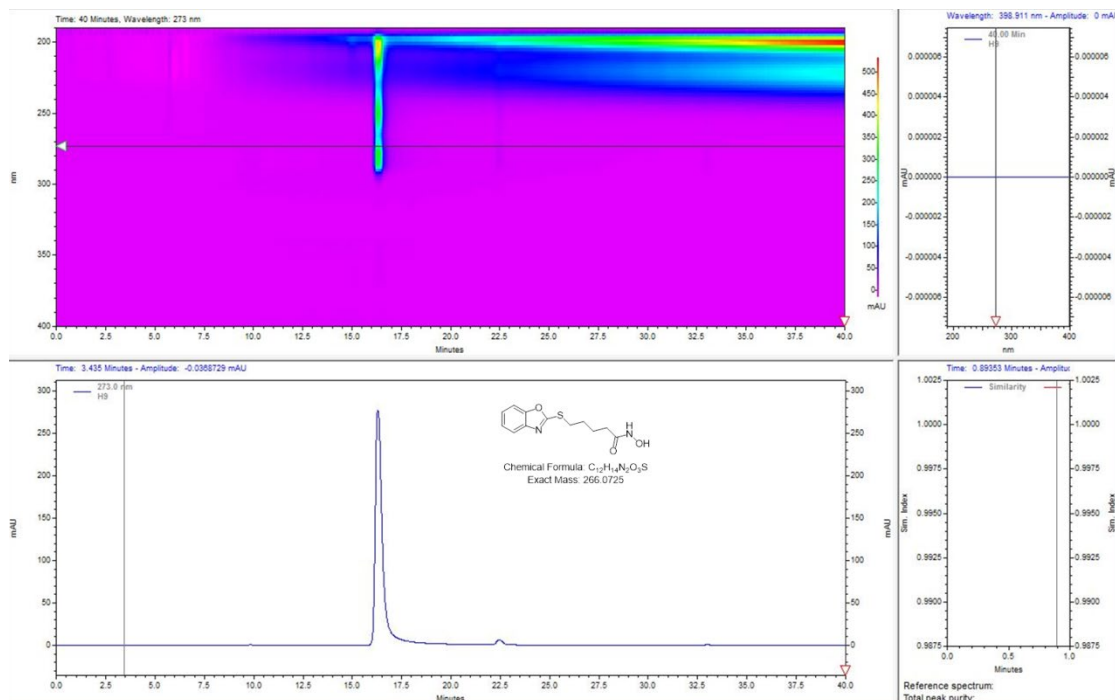

Figure S3.81 HPLC spectrum of compound 17

PerkinElmer Spectrum 10.5.2

July 8, 2021 5:28

Report Details

Report Location C:\Users\Administrator\Desktop\TTPTKQ  
2021080721B07D C13H16N2O3S  
Report Creator Administrator  
Report Date July 8, 2021 5:28

Sample Details

Filename C:\Users\Administrator\Desktop\TTPTKQ  
2021080721B07D C13H16N2O3S.sp  
Creation Date 7/8/2021 4:24:45 PM  
Analyst Administrator  
X-Axis Units cm-1  
X-Axis start value 4000  
X-Axis end value 400  
Data interval -1  
Number of points 3601  
Y-Axis Units %T  
Description Sample 255 By Administrator Date  
Thursday, July 08 2021

Spectrum

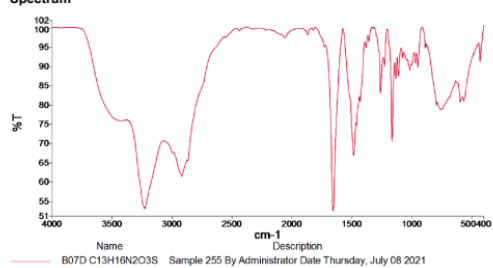

Figure S3.82 IR spectrum of compound 18



### ANALYSIS REPORT

**Injection details**

|                  |                        |                    |              |
|------------------|------------------------|--------------------|--------------|
| Sample name      | BO7D                   | Vial position      | 36           |
| Sample file name | SER_wifE - HUE         | Inject volume      | 5.00         |
| Acquisition date | 29/12/2020 03:47:29 PM | Acquisition method | ESI_POS_SCAN |
| Operator         | CB21261708             | Instrument name    | X500g QTOF   |

**Full mass spectrum**
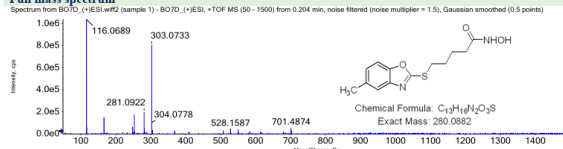
**Expanded spectrum**
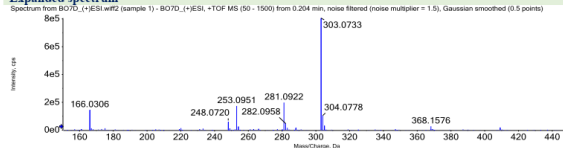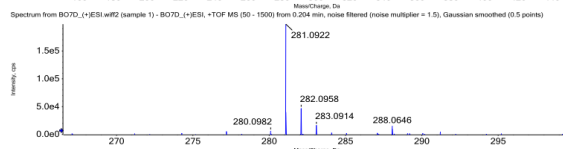
**Molecular formula prediction**

**Figure S3.83 MS spectrum of compound 18**

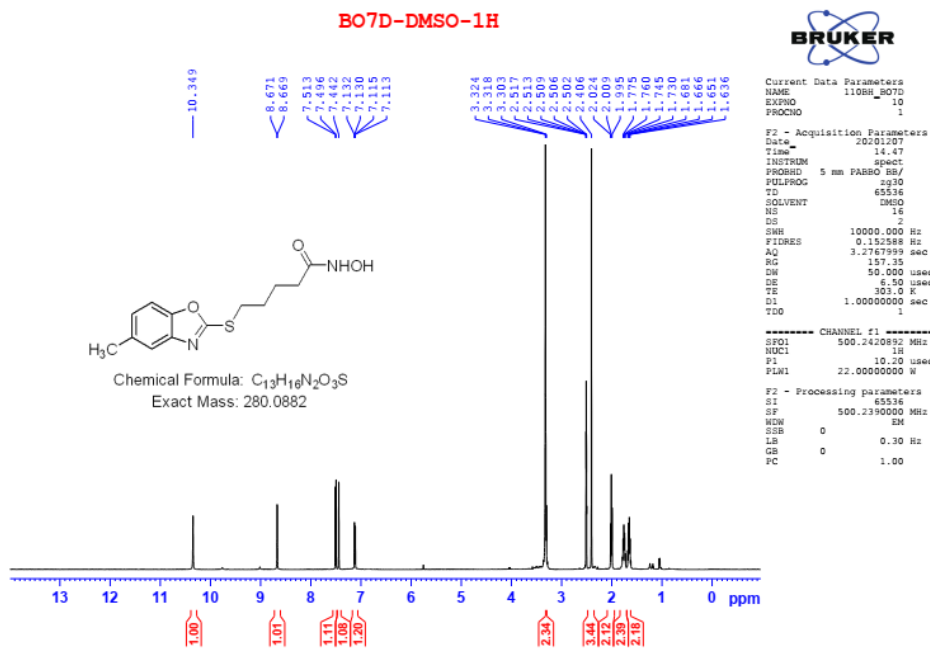

**Figure S3.84  $^1\text{H-NMR}$  spectrum of compound 18**

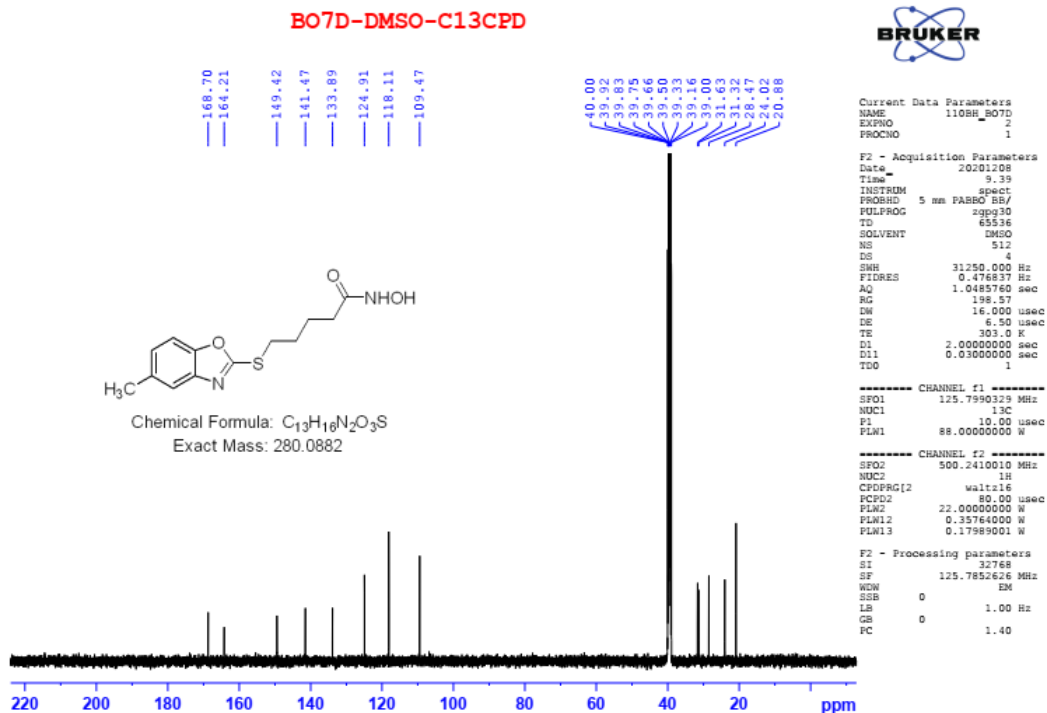

**Figure S3.85** <sup>13</sup>C-NMR spectrum of compound **18**

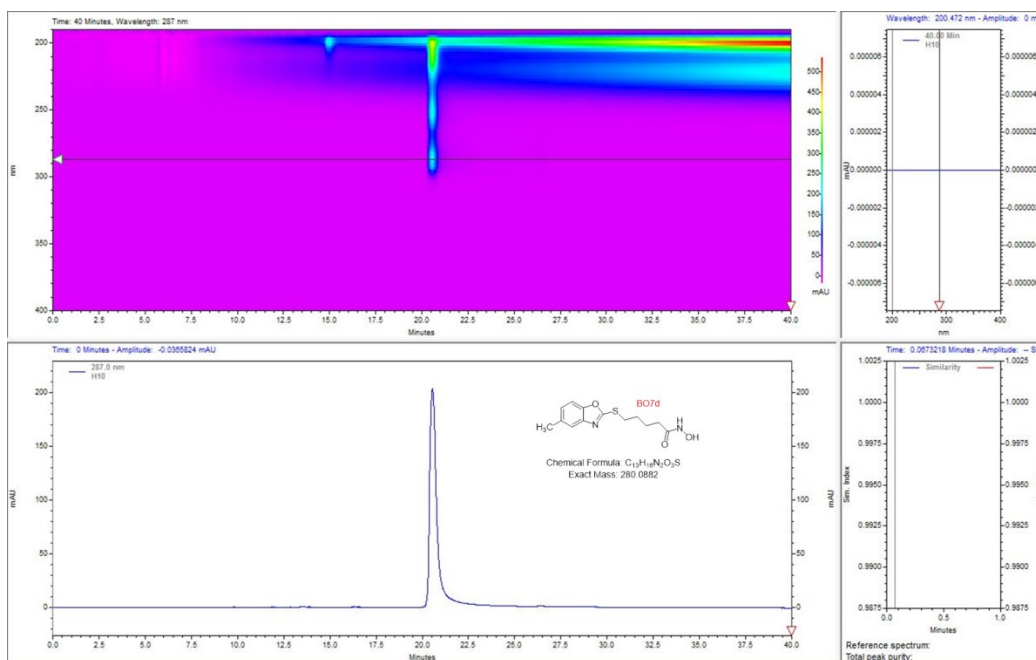

**Figure S3.86** HPLC spectrum of compound **18**

July 8, 2021 5:38

## Report Details

Report Location C:\Users\Administrator\Desktop\TTPT\KQ  
 2021\080721\B07B C13H16N2O4S  
 Report Creator Administrator  
 Report Date July 8, 2021 5:38

## Sample Details

Filename C:\Users\Administrator\Desktop\TTPT\KQ  
 2021\080721\B07B C13H16N2O4S.sp  
 Creation Date 7/8/2021 4:33:17 PM  
 Analyst Administrator  
 X-Axis Units cm-1  
 X-Axis start value 4000  
 X-Axis end value 400  
 Data interval -1  
 Number of points 3601  
 Y-Axis Units %T  
 Description Sample 255 By Administrator Date  
 Thursday, July 08 2021

## Spectrum

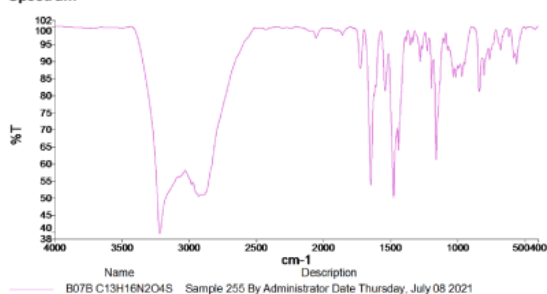

Figure S3.87 IR spectrum of compound 19

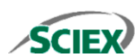

Created with SCIEX OS 1.2

CENTER FOR RESEARCH AND TECHNOLOGY TRANSFER  
 PHARMACEUTICAL CHEMISTRY LABORATORY  
 1B, Thanh Loc 29 St., Dist 12, Ho Chi Minh City, Vietnam. Phone: (84) 907 070 939

## ANALYSIS REPORT

## Injection details

|                  |                        |                    |              |
|------------------|------------------------|--------------------|--------------|
| Sample name      | BOSC                   | Vial position      | 34           |
| Sample file name | SER. wiff2 - HUE       | Inject volume      | 5.00         |
| Acquisition date | 09/06/2021 17:32:17 PM | Acquisition method | ESI_POS_SCAN |
| Operator         | CB21261708             | Instrument name    | X500R QTOF   |

## Full mass spectrum

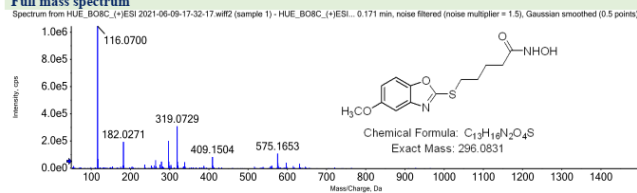

## Expanded spectrum

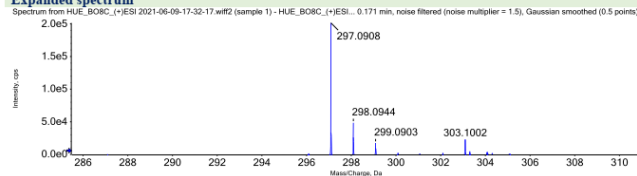

Figure S3.88 MS spectrum of compound 19

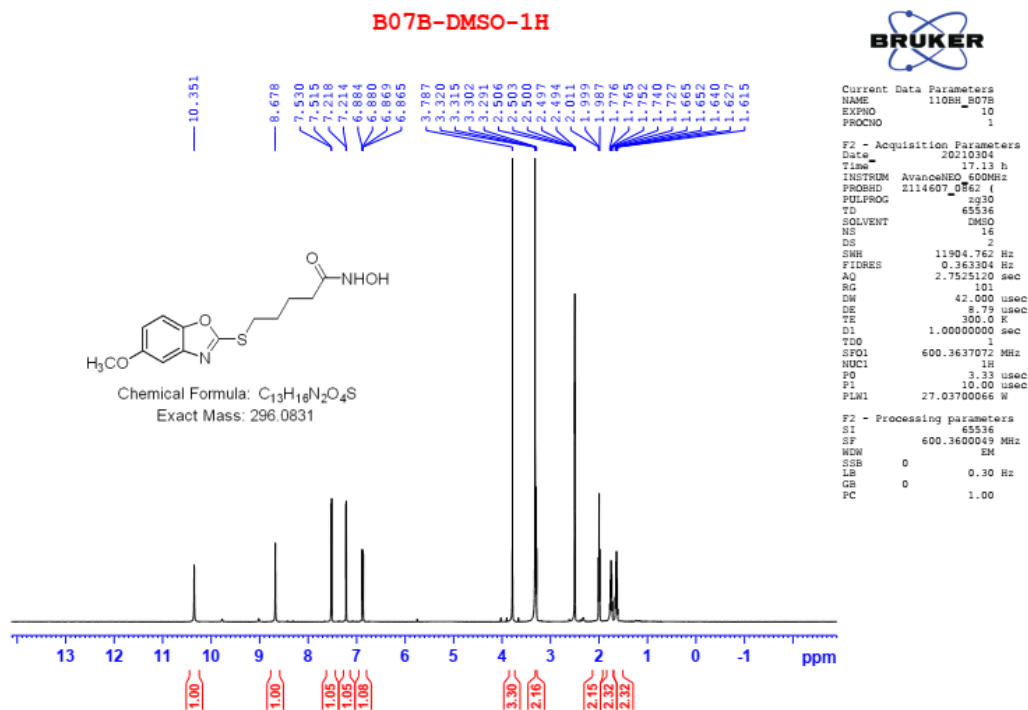

Figure S3.89  $^1H$ -NMR spectrum of compound 19

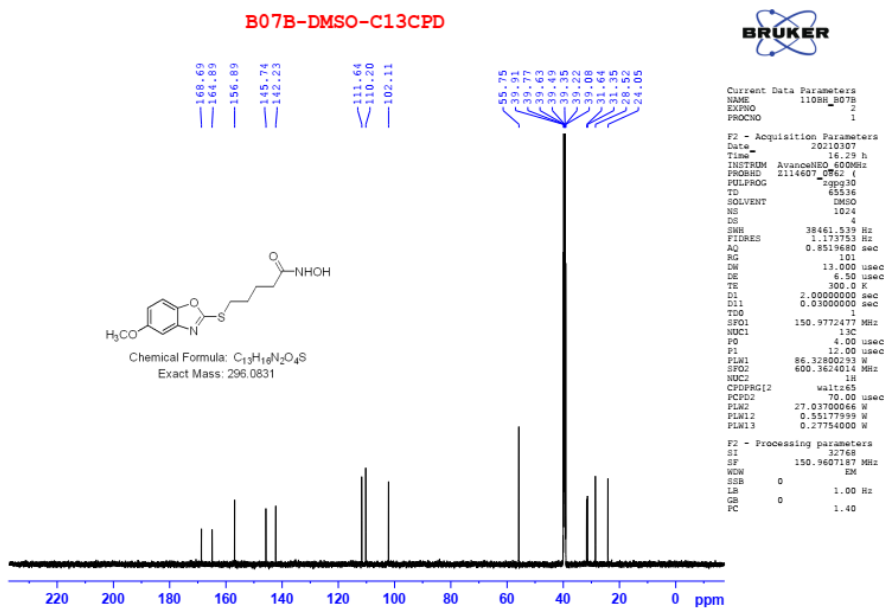

Figure S3.90  $^{13}C$ -NMR spectrum of compound 19

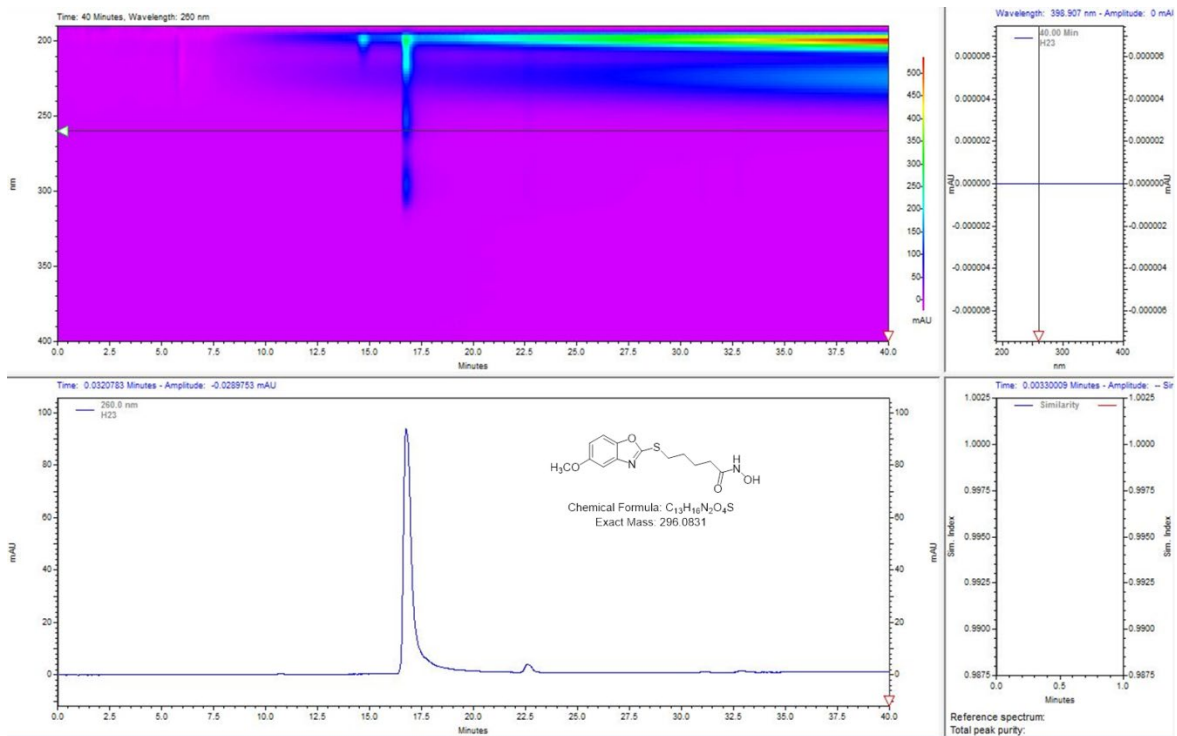

**Figure S3.91** HPLC spectrum of compound 19

## References

[1] Guta R, Putinã G, Ilie C, Cristescu C, Caproiu MT, Ganea E, et al. New Benzimidazoles Derivates (Small Hydroxamates) Possible Inhibitors of the Matrix Metalloproteinase. *Rev Chim.* 2009;60:1146-9.

[2] Kassab SE, Mowafy S, Alserw AM, Seliem JA, El-Naggar SM, Omar NN, et al. Structure-based design generated novel hydroxamic acid based preferential HDAC6 lead inhibitor with on-target cytotoxic activity against primary choroid plexus carcinoma. *Journal of enzyme inhibition and medicinal chemistry.* 2019;34:1062-77.
